# Supplementary material for: Representing connectivity: quantifying effective habitat availability based on area and connectivity for conservation status assessment and recovery
Source: PeerJ. 2014 Oct 9;2:e622. doi: 10.7717/peerj.622 (PMC4194459; doi:10.7717/peerj.622)
Supplement: Supplemental Information 2 [file peerj-02-622-s002.xlsx]

## Sheet: Data Key
DIST	Threshold distance (in meters) below which patches are considered to be in the same component
NL	Number of links between patches
NC	Number of components in the landscape
IICnum	Numerator of IIC
Sum_varIIC	Sum of IIC values across patches
Sum_varIICintra	Sum of the intra patch fraction of IIC across patches
Sum_varIICflux	Sum of theflux fraction of IIC across patches
Sum_varIICconnector	Sum of the conenctor fraction of IIC across patches
eciic	EC(IIC) for the landscape
thetaiicintra	varIICintra/sum_varIIC×100
thetaiicflux	varIICflux/sum_varIIC×100
thetaiicconnector	varIICconnector/sum_varIIC×100
dECIICch	Difference between EC(IIC) values in the full and critical habitat networks divided by the EC(IIC) in the full network
dECIICfs	Difference between EC(IIC) values in the full and Forest Service networks divided by the EC(IIC) in the full networ
da_ecch	Absolute difference in change in area and change in EC(IIC) between full network and critical habitat
da_ecfs	Absolute difference in change in area and change in EC(IIC) between full network and the Forest Service Reserve
propda_ecch	Proportional difference in change in area and change in EC(IIC) between full network and critical habitat
propda_ecfs	Proportional difference in change in area and change in EC(IIC) between full network and the Forest Service Reserve
propec_dach	Proportional difference in change in EC(IIC) and change in area between full network and critical habitat
propec_dafs	Proportional difference in change in EC(IIC) and change in area between full network and the Forest Service Reserve
diff__fs_thetaintra	Difference between thetaintra values in the full and Forest Service networks
diff__ch_thetaintra	Difference between thetaintra values in the full and critical habitat networks
diff__fs_thetaconnector	Difference between thetaconnector values in the full and Forest Service networks
diff__ch_thetaconnector	Difference between thetaconnector values in the full and critical habitat networks
diff__fs_thetaflux	Difference between thetaflux values in the full and Forest Service networks
diff__ch_thetaflux	Difference between thetaflux values in the full and critical habitat networks
AP	Acanthoscyphus parishii
EO	Eriogonum ovalifolium vineum
EP	Erigeron parishii
All	All habitat patches
CH	Habitat patches included in critical habitat
FS	Habitat patches included in Forest Service Reserve

## Sheet: AP_ALL
								42.684	0.00421155	9.82525e-05
DIST	NL	NC	IICnum	Sum_varIIC	Sum_varIICintra	Sum_varIICflux	Sum_varIICconnector	eciic	thetaiicintra	thetaiicflux	thetaiicconnector	dECIICch	dECIICfs	da_ecch	da_ecfs	propda_ecch	propda_ecfs	propec_dach	propec_dafs	diff__fs_thetaintra	diff__ch_thetaintra	diff__fs_thetaconnector	diff__ch_thetaconnector	diff__fs_thetaflux	diff__ch_thetaflux
100	23	76	1837.37	2298.98	1463.35	748.043	87.5913	42.8646	63.6521	32.538	3.81	0.00421155	0.212729	0.0324857	0.195528	8.71347	1.91914	0.114765	0.521067	5.11843	-0.0811986	0.933244	-0.0282936	-6.0516	0.109505
200	46	59	1930.98	2557.8	1463.35	935.259	159.193	43.9429	57.2113	36.565	6.22382	0.00616718	0.205074	0.0305301	0.203183	5.95041	1.99078	0.168056	0.502315	5.60576	-0.825801	1.66145	0.608626	-7.26715	0.217186
300	77	45	2074.32	2836.18	1463.35	1221.93	150.898	45.5447	51.5959	43.0838	5.32046	0.00523981	0.206242	0.0314574	0.202015	7.00355	1.97951	0.142785	0.505176	5.75589	-0.121901	-0.62095	-0.217005	-5.13488	0.338916
400	114	34	2481.39	3910.89	1463.35	2036.08	411.465	49.8135	37.4173	52.0617	10.521	0.0125847	0.228117	0.0241126	0.180139	2.91603	1.78968	0.342932	0.55876	0.450809	-2.29721	1.17573	3.11304	-1.6265	-0.81582
500	151	29	2824.87	4758.44	1463.35	2723.04	572.052	53.1495	30.7527	57.2255	12.0218	0.0126931	0.260282	0.0240041	0.147975	2.89111	1.56852	0.345888	0.637544	-4.21073	-1.07692	3.25943	0.882435	0.951329	0.194494
600	183	25	3343.05	6489.55	1463.35	3759.41	1266.79	57.8192	22.5493	57.9302	19.5204	0.0117595	0.223828	0.0249377	0.184429	3.12064	1.82398	0.320447	0.548252	1.39023	-0.483323	-2.12688	0.0378793	0.736668	0.445448
700	206	23	3444.37	6439.44	1463.35	3962.05	1014.04	58.6888	22.7248	61.5278	15.7474	0.0131527	0.222329	0.0235446	0.185928	2.7901	1.83628	0.35841	0.544581	1.21929	-0.621404	-1.14902	0.237269	-0.070256	0.384139
800	238	18	3506.25	6160.48	1463.35	4085.81	611.321	59.2136	23.7538	66.3229	9.92327	0.0141519	0.222829	0.0225453	0.185428	2.59309	1.83215	0.38564	0.545806	1.54508	-0.585496	-2.45619	-0.20461	0.911126	0.790109
900	271	14	4296.85	8912.97	1463.35	5667	1782.62	65.5503	16.4182	63.5815	20.0003	0.0133933	0.257663	0.023304	0.150594	2.73997	1.58446	0.364967	0.631129	-4.37556	-0.230601	14.1814	-0.761649	-9.80587	0.992248
1000	295	11	5251.71	12771.3	1463.35	7576.73	3731.26	72.4687	11.4581	59.3261	29.2159	0.0176341	0.319544	0.0190631	0.0887126	2.08104	1.27762	0.480529	0.782704	-8.65422	-0.385362	23.3072	0.026314	-14.653	0.35905
1100	324	9	5511.02	11426.4	1463.35	8095.33	1867.74	74.2362	12.8067	70.8475	16.3458	0.0206689	0.306454	0.0160283	0.101803	1.77548	1.3322	0.563229	0.750641	-4.66991	-0.436327	7.05168	-0.510722	-2.38176	0.947052
1200	350	9	5599.71	11587.5	1463.35	8272.73	1851.42	74.8312	12.6287	71.3936	15.9778	0.0201266	0.306575	0.0165707	0.101682	1.82332	1.33167	0.548449	0.750935	-5.44722	-0.961491	11.5554	3.00398	-6.10818	-2.04249
1300	387	8	5818.03	10778.3	1463.35	8709.36	605.626	76.276	13.5768	80.8043	5.61892	0.0233054	0.308163	0.0133918	0.100094	1.57462	1.32481	0.635072	0.754826	-4.28935	-0.671088	3.93279	0.259251	0.356566	0.411835
1400	419	7	6147.63	11195.1	1463.35	9368.57	363.226	78.4068	13.0713	83.6842	3.2445	0.0248736	0.320951	0.0118236	0.0873057	1.47535	1.27202	0.677806	0.78615	-4.52664	-0.733294	2.13664	0.55956	2.39	0.173738
1500	458	5	8119.56	20298.3	1463.35	13312.4	5522.51	90.1086	7.20923	65.584	27.2068	0.029595	0.405156	0.00710229	0.0031006	1.23998	1.00765	0.806463	0.992405	-10.1503	-0.435839	26.3119	0.0546544	-16.1616	0.381186
1600	498	5	8315.61	17103.5	1463.35	13704.5	1935.6	91.19	8.55587	80.1271	11.317	0.0302432	0.406599	0.00645401	0.00165805	1.2134	1.00408	0.824128	0.995939	-8.46215	-0.540273	10.6626	0.173126	-2.20047	0.367143
1700	532	5	8567.02	17808.9	1463.35	14207.3	2138.18	92.5582	8.21697	79.7768	12.0062	0.0292032	0.409951	0.00749405	-0.00169383	1.25662	0.995868	0.795787	1.00415	-8.52918	-0.519353	11.8978	0.399827	-3.36859	0.119526
1800	577	5	8853.34	18491.7	1463.35	14780	2248.36	94.0922	7.91356	79.9277	12.1588	0.0299837	0.416863	0.00671358	-0.00860602	1.22391	0.979355	0.817055	1.02108	-8.60822	-0.501272	11.7879	0.270765	-3.17965	0.230506
1900	624	5	9078.46	19003.9	1463.35	15230.2	2310.32	95.281	7.70026	80.1427	12.1571	0.0310238	0.420682	0.00567344	-0.0124252	1.18287	0.970464	0.845399	1.03043	-8.62466	-0.50539	11.9809	0.265422	-3.35629	0.239974
2000	649	5	9303.41	19570.6	1463.35	15680.1	2427.14	96.4542	7.47728	80.1208	12.402	0.0261439	0.423062	0.0105534	-0.0148054	1.40367	0.965004	0.712421	1.03626	-8.53972	-0.284854	12.209	-1.05169	-3.66927	1.33655
2100	693	5	9675.26	20561.3	1463.35	16423.8	2674.09	98.3629	7.11703	79.8775	13.0055	0.0302847	0.430869	0.00641255	-0.0226117	1.21174	0.947521	0.825258	1.05539	-8.7038	-0.50519	12.9648	0.875921	-4.26103	-0.370725
2200	727	5	9843.99	20800.3	1463.35	16761.3	2575.71	99.2169	7.03522	80.5818	12.383	0.032502	0.433611	0.00419527	-0.0253538	1.12908	0.941529	0.885679	1.0621	-8.63796	-0.486961	12.2881	0.305768	-3.6501	0.181205
2300	748	5	9901.76	20903.2	1463.35	16876.8	2562.98	99.5076	7.00062	80.7382	12.2612	0.0307421	0.434589	0.00595518	-0.0263324	1.19371	0.939409	0.837721	1.0645	-8.63403	-0.431269	12.1969	0.027356	-3.56282	0.403916
2400	777	5	10197.2	22083	1463.35	17467.7	3151.88	100.981	6.6266	79.1005	14.2729	0.041685	0.439114	-0.00498777	-0.0308574	0.880346	0.929728	1.13592	1.07558	-8.76805	-0.764314	14.2017	2.19102	-5.43367	-1.42671
2500	805	4	10821.2	23781.9	1463.35	18715.8	3602.78	104.025	6.15321	78.6975	15.1493	0.0319404	0.43608	0.0047569	-0.0278235	1.14893	0.936196	0.870375	1.06815	-7.49271	-0.329658	11.1591	-0.805021	-3.66636	1.13467
2600	826	4	10967	23959.8	1463.35	19007.3	3489.13	104.724	6.10752	79.3301	14.5624	0.0323991	0.43782	0.0042981	-0.0295629	1.13266	0.932477	0.882877	1.07241	-7.51405	-0.404277	11.1922	0.120892	-3.6782	0.283388
2700	852	3	11088.8	21118.7	1463.35	19250.9	404.463	105.303	6.92918	91.1556	1.91519	0.0321578	0.437994	0.00453946	-0.0297368	1.14116	0.932107	0.8763	1.07284	-6.95613	-0.451662	1.59341	0.103308	5.36272	0.348366
2800	881	3	11256.1	21386	1463.35	19585.4	337.179	106.095	6.84257	91.5808	1.57664	0.0332065	0.441094	0.00349071	-0.0328368	1.10512	0.925556	0.904878	1.08043	-7.01898	-0.446419	1.52861	-0.113527	5.49035	0.559933
2900	902	3	11378.7	21644.5	1463.35	19830.8	350.421	106.671	6.76083	91.6202	1.61898	0.0334763	0.443652	0.00322099	-0.0353955	1.09622	0.920218	0.912228	1.0867	-7.07454	-0.447797	1.57105	-0.0758968	5.50348	0.523695
3000	936	3	11468	21670.1	1463.35	20009.2	197.497	107.089	6.75286	92.3358	0.911381	0.0335739	0.445111	0.00312334	-0.036854	1.09303	0.917203	0.914889	1.09027	-7.04224	-0.456042	0.86359	0.0262599	6.17865	0.429779
3100	966	3	11620.9	22172.8	1463.35	20315	394.441	107.8	6.59974	91.6213	1.77894	0.0336623	0.447331	0.00303496	-0.0390745	1.09016	0.91265	0.917297	1.09571	-7.11984	-0.446344	1.77665	0.021662	5.34319	0.42469
3200	998	2	13621.8	29522.2	1463.35	24316.8	3742.05	116.712	4.95677	82.3679	12.6753	0.0350986	0.489072	0.00159868	-0.0808151	1.04555	0.834758	0.956436	1.19795	-8.73413	-0.361188	12.6693	0.228822	-3.93515	0.132359
3300	1020	2	13680.6	29605.4	1463.35	24434.5	3707.62	116.964	4.94284	82.5337	12.5235	0.0350423	0.489431	0.00165492	-0.0811744	1.04723	0.834145	0.954904	1.19883	-8.70317	-0.359772	12.5187	0.234938	-3.81557	0.124829
3400	1049	2	13969.8	28579.5	1463.35	25012.9	2103.23	118.194	5.12028	87.5205	7.35921	0.0350806	0.492683	0.00161662	-0.0844257	1.04608	0.828641	0.955947	1.2068	-8.40072	-0.366453	7.35921	0.143158	1.0415	0.223282
3500	1080	2	14197.4	29066.1	1463.35	25468.2	2134.56	119.153	5.03456	87.6216	7.34382	0.0349903	0.49627	0.00170694	-0.0880136	1.04878	0.82265	0.953486	1.21558	-8.45627	-0.358148	7.34381	0.129967	1.11245	0.228176
3600	1107	2	14461.9	29723.9	1463.35	25997.1	2263.41	120.258	4.92314	87.4621	7.61478	0.036707	0.500457	-9.76076e-06	-0.0922001	0.999734	0.815768	1.00027	1.22584	-8.54067	-0.388705	7.61478	0.460993	0.925887	-0.0722933
3700	1138	2	14634.1	30011.8	1463.35	26341.5	2206.96	120.972	4.87591	87.7705	7.35362	0.0367827	0.502945	-8.5477e-05	-0.0946886	0.997676	0.811732	1.00233	1.23193	-8.55922	-0.370715	7.34999	0.198766	1.20922	0.171945
3800	1171	2	14757.9	30235.4	1463.35	26589.1	2183.01	121.482	4.83985	87.9401	7.22003	0.0366006	0.50462	9.66193e-05	-0.0963634	1.00264	0.809038	0.997367	1.23604	-8.5703	-0.363207	7.22003	0.154073	1.35026	0.209129
3900	1205	2	14848.1	30436.8	1463.35	26769.5	2203.9	121.853	4.80784	87.9513	7.2409	0.0380265	0.505862	-0.00132921	-0.0976047	0.965045	0.807053	1.03622	1.23908	-8.58293	-0.385056	7.21832	0.300693	1.36461	0.0843686
4000	1233	2	15086.7	31029.2	1463.35	27246.7	2319.18	122.828	4.71604	87.8098	7.4742	0.0360799	0.509459	0.000617337	-0.101202	1.01711	0.801354	0.983178	1.24789	-8.65303	-0.336045	7.43987	-0.0600093	1.21315	0.396049
4100	1269	2	15262.3	31280.2	1463.35	27597.8	2218.97	123.541	4.6782	88.2279	7.09386	0.0361188	0.511873	0.000578442	-0.103616	1.01601	0.797575	0.984237	1.2538	-8.66961	-0.341713	7.09385	0.0907093	1.57576	0.251
4200	1297	2	15369.3	31520.8	1463.35	27811.8	2245.67	123.973	4.64248	88.2331	7.12441	0.036048	0.513353	0.000649249	-0.105096	1.01801	0.795276	0.982308	1.25743	-8.69153	-0.338208	7.1244	0.0906958	1.56713	0.247509
4300	1330	2	15431.4	31595.3	1463.35	27936.1	2195.89	124.223	4.63154	88.4184	6.95004	0.0363959	0.514154	0.000301352	-0.105897	1.00828	0.794036	0.991788	1.25939	-8.69134	-0.342954	6.95004	0.125244	1.74131	0.217713
4400	1366	2	15531.6	31771.2	1463.35	28136.4	2171.38	124.626	4.60591	88.5597	6.83443	0.0371392	0.515261	-0.000441978	-0.107004	0.988099	0.79233	1.01204	1.2621	-8.68819	-0.351849	6.83443	0.17928	1.85377	0.172567
4500	1394	2	15840	32724.2	1463.35	28753.3	2507.64	125.857	4.47176	87.8653	7.66294	0.0371528	0.520003	-0.000455573	-0.111746	0.987738	0.785104	1.01241	1.27372	-8.82234	-0.338447	7.66293	0.120907	1.1594	0.217543
4600	1421	2	16061.8	31094.9	1463.35	29196.8	434.745	126.735	4.70608	93.8958	1.39812	0.0367175	0.489613	-2.02886e-05	-0.0813566	0.999447	0.833835	1.00055	1.19928	-5.70754	-0.34224	-7.27114	-0.0442923	12.9787	0.386536
4700	1454	2	16201.1	31315.7	1463.35	29475.6	376.781	127.284	4.67289	94.1239	1.20317	0.0367461	0.490919	-4.88494e-05	-0.0826619	0.998671	0.831618	1.00133	1.20248	-6.25589	-0.339399	-2.57145	-0.0559917	8.82734	0.395382
4800	1481	2	16331.1	31513.2	1463.35	29735.4	314.491	127.793	4.6436	94.3584	0.997964	0.0366151	0.492342	8.2193e-05	-0.084085	1.00224	0.829214	0.99776	1.20596	-6.25108	-0.332842	-2.8216	-0.113136	9.07267	0.445973
4900	1518	2	16432.6	31651.4	1463.35	29938.5	249.552	128.19	4.62333	94.5882	0.788438	0.0371369	0.493058	-0.000439648	-0.0848008	0.988161	0.82801	1.01198	1.20771	-6.23202	-0.343852	-3.01734	0.0250165	9.24935	0.318823
5000	1553	2	16814.1	32414.2	1463.35	30701.4	249.418	129.669	4.51453	94.716	0.769471	0.0363026	0.492966	0.000394633	-0.0847089	1.01087	0.828165	0.989246	1.20749	-6.47881	-0.323573	0.743342	-0.0365846	5.73547	0.360151
5100	1584	2	16844.1	32420.9	1463.35	30761.6	195.976	129.785	4.5136	94.8819	0.604475	0.0347666	0.49294	0.00193062	-0.0846829	1.05553	0.828208	0.947391	1.20743	-6.45923	-0.306995	0.601206	-0.0439342	5.85804	0.350924
5200	1620	2	16978.7	32662	1463.35	31030.7	167.953	130.302	4.48029	95.0055	0.514215	0.0357372	0.494311	0.000960073	-0.086054	1.02686	0.825911	0.973838	1.21078	-6.46166	-0.31604	0.510954	-0.0164498	5.9507	0.332479
5300	1652	2	17059.7	32825.9	1463.35	31192.8	169.745	130.613	4.45792	95.025	0.517109	0.0359273	0.495346	0.000769953	-0.0870889	1.02143	0.824186	0.979019	1.21332	-6.47631	-0.315949	0.517106	-0.0250665	5.95919	0.341003
5400	1684	2	17290.5	33267.2	1463.35	31654.3	149.535	131.493	4.39877	95.1517	0.449497	0.0360151	0.496673	0.000682196	-0.088416	1.01894	0.821983	0.98141	1.21657	-6.43235	-0.315096	0.408074	0.0307004	6.02427	0.284392
5500	1706	2	17330.6	33362.6	1463.35	31734.5	164.776	131.646	4.38619	95.1199	0.493895	0.0359329	0.496921	0.000764315	-0.0886641	1.02127	0.821573	0.979172	1.21718	-6.42682	-0.312736	0.432568	0.0182788	5.99425	0.29445
5600	1735	2	17418.9	33542.4	1463.35	31911.1	167.935	131.981	4.36269	95.1367	0.500664	0.0358334	0.49799	0.000863879	-0.0897334	1.02411	0.819809	0.976459	1.2198	-6.43947	-0.308971	0.430455	-0.00311548	6.00902	0.312088
5700	1767	2	17678.8	34033.8	1463.35	32430.9	139.512	132.962	4.2997	95.2904	0.409922	0.0356874	0.499352	0.0010098	-0.0910951	1.0283	0.817573	0.972483	1.22313	-6.39655	-0.303173	0.393118	0.00405449	6.00343	0.299125
5800	1792	2	17757.3	34128.7	1463.35	32588	77.3778	133.257	4.28774	95.4855	0.226723	0.035554	0.500158	0.00114323	-0.0919013	1.03215	0.816255	0.968847	1.22511	-6.39257	-0.302495	0.194545	0.0378727	6.19803	0.264631
5900	1818	2	17865.7	34340	1463.35	32804.7	71.953	133.663	4.26136	95.5291	0.209531	0.03586	0.501114	0.000837249	-0.0928566	1.02335	0.814699	0.977185	1.22745	-6.39573	-0.303307	0.209529	0.0319283	6.1862	0.271376
6000	1846	2	17942.2	34526.3	1463.35	32957.7	105.258	133.948	4.23836	95.4568	0.304864	0.0358224	0.502145	0.00087481	-0.0938882	1.02442	0.813026	0.976161	1.22997	-6.41716	-0.30093	0.304862	0.0250314	6.1123	0.275902
6100	1880	2	18014.3	34612.5	1463.35	33101.8	47.2926	134.217	4.22781	95.6356	0.136635	0.036266	0.503115	0.000431236	-0.0948585	1.01189	0.811458	0.988249	1.23235	-6.42645	-0.304524	0.136632	0.0259582	6.28983	0.278573
6200	1910	2	18088.6	34749	1463.35	33250.4	35.1824	134.494	4.21121	95.6876	0.101248	0.0366465	0.404962	5.07014e-05	0.00329518	1.00138	1.00814	0.998618	0.991929	-1.24785	-0.308134	-23.713	0.051053	24.9609	0.257091
6300	1948	2	18174.1	34928.6	1463.35	33421.6	43.697	134.811	4.18954	95.6854	0.125104	0.0373087	0.405225	-0.000611498	0.00303233	0.98361	1.00748	1.01666	0.992572	-1.98722	-0.309113	-13.3178	-0.0341539	15.305	0.343265
6400	1975	2	18221.7	35032.9	1463.35	33516.7	52.8096	134.988	4.17708	95.6722	0.150743	0.0375357	0.405938	-0.000838406	0.00231883	0.977664	1.00571	1.02285	0.99432	-1.99847	-0.312608	-13.2895	0.0157015	15.2879	0.296904
6500	2011	2	18287	35140	1463.35	33647.4	29.3342	135.23	4.16434	95.7522	0.0834779	0.037393	0.406996	-0.000695742	0.00126081	0.981394	1.0031	1.01896	0.996912	-2.01113	-0.310541	-13.3566	0.0229238	15.3677	0.287613
6600	2046	2	18402.4	35411.6	1463.35	33878.1	70.1544	135.655	4.13241	95.6695	0.198111	0.0368861	0.407776	-0.000188844	0.000480456	0.99488	1.00118	1.00515	0.998823	-2.96412	-0.298046	0.0584014	-0.0929202	2.90573	0.390976
6700	2075	2	18442.3	35471.3	1463.35	33957.8	50.1139	135.802	4.12545	95.7333	0.14128	0.036898	0.407862	-0.000200749	0.000395098	0.994559	1.00097	1.00547	0.999032	-2.95802	-0.299208	0.0183191	-0.0573821	2.93971	0.356594
6800	2101	2	18471.9	35529	1463.35	34017	48.627	135.911	4.11875	95.7444	0.136866	0.0367935	0.404204	-9.62608e-05	0.00405282	0.997384	1.01003	1.00262	0.990073	-2.81309	-0.299982	-0.656874	-0.00582685	3.46997	0.305801
6900	2129	2	18553.3	35724.3	1463.35	34179.8	81.1437	136.21	4.09623	95.6766	0.227139	0.0385083	0.405487	-0.00181108	0.00277019	0.952969	1.00683	1.04935	0.993215	-2.83497	-0.319671	-0.566527	0.107372	3.4015	0.212292
7000	2163	2	18603.8	35809.8	1463.35	34280.9	65.5207	136.396	4.08645	95.7306	0.182969	0.0375461	0.406021	-0.000848888	0.00223631	0.977391	1.00551	1.02313	0.994522	-2.83675	-0.300812	-0.627058	-0.0941227	3.46383	0.394935
7100	2190	2	18646	35878.6	1463.35	34365.3	49.9751	136.55	4.07861	95.7821	0.139289	0.0376406	0.405261	-0.000943392	0.00299619	0.974937	1.00739	1.02571	0.992661	-2.79049	-0.304445	-0.936897	-0.0180147	3.7274	0.32246
7200	2218	2	18735.7	36064.6	1463.35	34544.8	56.4473	136.879	4.05758	95.7859	0.156517	0.0375732	0.403651	-0.000875922	0.00460629	0.976688	1.01141	1.02387	0.988717	-2.74744	-0.303773	-0.767165	0.0186242	3.51461	0.28515
7300	2237	2	18771.1	36121.3	1463.35	34615.5	42.4384	137.008	4.05121	95.8313	0.117488	0.037775	0.404068	-0.00107774	0.00418856	0.97147	1.01037	1.02937	0.98974	-2.75299	-0.304878	-0.766797	0.0117565	3.51979	0.293118
7400	2265	2	18842.5	36272.5	1463.35	34758.3	50.7789	137.268	4.03433	95.8257	0.139993	0.0377344	0.405148	-0.00103719	0.00310891	0.972513	1.00767	1.02826	0.992385	-2.7959	-0.303978	-0.34709	0.0302125	3.14299	0.273763
7500	2285	2	18892.9	36380.8	1463.35	34859.1	58.4027	137.451	4.02231	95.8172	0.160532	0.0378751	0.401903	-0.0011779	0.00635345	0.9689	1.01581	1.0321	0.984438	-2.68938	-0.304271	-0.628181	0.028218	3.31756	0.276056
7600	2313	2	18952.7	36481.4	1463.35	34978.7	39.3359	137.669	4.01123	95.8809	0.107825	0.0379104	0.402331	-0.0012131	0.00592572	0.968001	1.01473	1.03306	0.985485	-2.72885	-0.303752	-0.0771266	0.0289422	2.80597	0.274811
7700	2330	2	18971.9	36508.3	1463.35	35017.1	27.855	137.738	4.00827	95.9154	0.0762978	0.0379343	0.402462	-0.00123708	0.00579493	0.967389	1.0144	1.03371	0.985806	-2.73358	-0.303682	-0.0211557	0.0276284	2.75474	0.276052
7800	2355	2	19043.7	36628.2	1463.35	35160.7	4.10895	137.999	3.99515	95.9936	0.011218	0.0379166	0.403374	-0.00121932	0.00488251	0.967842	1.0121	1.03323	0.988041	-2.74099	-0.30141	-0.0937743	0.00290188	2.83477	0.298498
7900	2375	2	19124.5	36807.8	1463.35	35322.4	22.0316	138.292	3.97566	95.9645	0.0598559	0.037736	0.404227	-0.00103877	0.0040299	0.972473	1.00997	1.02831	0.990129	-2.75384	-0.29782	0.00294436	-0.00627123	2.75091	0.304091
8000	2395	2	19151.1	36845.1	1463.35	35375.5	6.22935	138.388	3.97163	96.0115	0.0169069	0.0377089	0.404272	-0.00101167	0.00398522	0.973172	1.00986	1.02757	0.990238	-2.74555	-0.297527	-0.091097	0.000231752	2.83664	0.297297
8100	2419	2	19234.8	37012.8	1463.35	35543	6.44785	138.69	3.95364	96.029	0.0174206	0.0380234	0.404483	-0.00132615	0.00377388	0.965123	1.00933	1.03614	0.990756	-2.7376	-0.299052	-0.0877736	0.000947362	2.82538	0.298115
8200	2436	2	19277.8	37114	1463.35	35628.9	21.7629	138.845	3.94285	95.9985	0.0586378	0.0379733	0.401913	-0.00127603	0.00634409	0.966397	1.01578	1.03477	0.984461	-2.64011	-0.297805	-0.519568	0.00231181	3.15968	0.295499
8300	2454	2	19341.3	37244.7	1463.35	35755.9	25.4935	139.073	3.92901	96.0025	0.0684485	0.0379499	0.40249	-0.0012527	0.00576694	0.966991	1.01433	1.03414	0.985874	-2.68255	-0.296144	0.066808	-0.00622695	2.61576	0.302375
8400	2476	2	19433.1	37410.8	1463.35	35939.5	7.95155	139.403	3.91157	96.0672	0.0212547	0.0378449	0.400111	-0.00114769	0.00814587	0.969674	1.02036	1.03127	0.980047	-2.59581	-0.294122	-0.216873	0.0010835	2.81269	0.293042
8500	2503	2	19513.2	37565.1	1463.35	36099.7	2.02081	139.69	3.8955	96.0991	0.00537949	0.037876	0.4011	-0.00117875	0.00715709	0.968879	1.01784	1.03212	0.982469	-2.60602	-0.293019	-0.236025	-0.00191845	2.84205	0.294945
8600	2529	2	19629.1	37805.9	1463.35	36331.5	11.0877	140.104	3.87069	96.1	0.029328	0.0380789	0.401356	-0.00138162	0.0069004	0.963717	1.01719	1.03765	0.983098	-2.59602	-0.293267	-0.209781	0.00667253	2.8058	0.286593
8700	2547	2	19699.8	37943.3	1463.35	36472.9	7.01988	140.356	3.85668	96.1248	0.018501	0.0377555	0.402014	-0.00105821	0.00624257	0.971972	1.01553	1.02884	0.984709	-2.59961	-0.288917	-0.233131	-0.00153558	2.83273	0.290451
8800	2567	2	19777	38137.9	1463.35	36627.3	47.3137	140.631	3.83699	96.0389	0.124059	0.0376299	0.398365	-0.000932627	0.00989169	0.975216	1.02483	1.02541	0.975771	-2.47978	-0.285916	-0.598833	-0.0102474	3.07861	0.296157
8900	2578	2	19812.7	38180.2	1463.35	36698.8	18.104	140.758	3.83274	96.1198	0.0474173	0.0376063	0.398234	-0.000909015	0.010023	0.975828	1.02517	1.02477	0.975449	-2.5008	-0.285719	-0.174286	-0.00172929	2.67509	0.287445
9000	2595	2	19830.6	38215	1463.35	36734.6	17.0346	140.821	3.82926	96.1262	0.0445757	0.0376022	0.398193	-0.000904992	0.0100637	0.975932	1.02527	1.02466	0.97535	-2.49915	-0.285332	-0.147806	-0.00368189	2.64695	0.289012
9100	2618	2	19914.5	38375.4	1463.35	36902.3	9.70415	141.119	3.81325	96.1615	0.0252874	0.0375903	0.399192	-0.000893057	0.00906445	0.976242	1.02271	1.02434	0.977797	-2.50891	-0.28405	-0.170509	-0.00208809	2.67942	0.286138
9200	2640	2	20021	38592.4	1463.35	37115.2	13.8034	141.495	3.79181	96.1724	0.0357673	0.0373575	0.397274	-0.000660253	0.010983	0.982326	1.02765	1.01799	0.973098	-2.43455	-0.280306	-0.441454	-0.00293307	2.87601	0.283237
9300	2659	2	20051.7	38645.9	1463.35	37176.7	5.79217	141.604	3.78656	96.1985	0.0149878	0.0373952	0.396357	-0.000697962	0.0118999	0.981336	1.03002	1.01902	0.970852	-2.41096	-0.280314	-0.440608	-0.000926092	2.85157	0.281236
9400	2680	2	20069.5	38683.4	1463.35	37212.4	7.70979	141.667	3.78288	96.1972	0.0199305	0.0373669	0.396426	-0.000669639	0.0118306	0.982079	1.02984	1.01825	0.971022	-2.41078	-0.279825	-0.427989	0.000113695	2.83877	0.279707
9500	2701	1	20830.9	40219	1463.35	38735.2	20.4408	144.329	3.63846	96.3107	0.0508237	0.0366006	0.407103	9.66554e-05	0.0011536	1.00264	1.00283	0.997366	0.997174	-2.54349	-0.262383	-0.422728	0.00260327	2.96621	0.259776
9600	2728	1	20900	40358.8	1463.35	38873.3	22.1079	144.568	3.62585	96.3194	0.0547784	0.0364919	0.408005	0.000205351	0.000251818	1.00563	1.00062	0.994404	0.999383	-2.55742	-0.260746	-0.369187	0.00816331	2.92662	0.252589
9700	2753	1	21071	40731.8	1463.35	39215.3	53.1555	145.159	3.59264	96.2769	0.130501	0.0362002	0.408597	0.000497009	-0.000340601	1.01373	0.999166	0.986456	1.00083	-2.56542	-0.255144	-0.0501781	-0.0103198	2.61559	0.265463
9800	2771	1	21090	40774.1	1463.35	39253.4	57.3182	145.224	3.58892	96.2705	0.140575	0.0362526	0.40872	0.000444629	-0.000463311	1.01226	0.998866	0.987884	1.00113	-2.56788	-0.255338	-0.00884683	-0.00945964	2.57672	0.264798
9900	2790	1	21154.7	40880.1	1463.35	39382.7	34.073	145.446	3.57961	96.337	0.0833485	0.0361737	0.40945	0.000523515	-0.00119328	1.01447	0.997086	0.985734	1.00292	-2.57334	-0.254258	-0.06598	-0.00258692	2.63931	0.256843
10000	2810	1	21248.7	41099.6	1463.35	39570.7	65.6175	145.769	3.56049	96.2798	0.159655	0.0361245	0.410364	0.000572792	-0.00210732	1.01586	0.994865	0.984391	1.00516	-2.58376	-0.252396	0.0105374	-0.00405361	2.57321	0.256441
10100	2830	1	21334.4	41249.5	1463.35	39742.1	44.0541	146.063	3.54756	96.3456	0.106799	0.0360493	0.409826	0.000647959	-0.00156901	1.01797	0.996172	0.982343	1.00384	-2.54712	-0.250991	-0.230904	0.00030624	2.77802	0.250685
10200	2847	1	21351.5	41281	1463.35	39776.3	41.3314	146.122	3.54485	96.355	0.100122	0.0361135	0.409865	0.000583787	-0.0016084	1.01617	0.996076	0.984092	1.00394	-2.55022	-0.251018	-0.160481	-0.00754476	2.71071	0.258573
10300	2861	1	21371.2	41305.6	1463.35	39815.7	26.542	146.189	3.54274	96.393	0.0642576	0.0361572	0.409058	0.000540079	-0.000801537	1.01494	0.998041	0.985283	1.00196	-2.52208	-0.251324	-0.305866	-0.00472786	2.82795	0.256059
10400	2879	1	21530.1	41631	1463.35	40133.6	34.0286	146.732	3.51505	96.4032	0.0817385	0.0361084	0.410207	0.000588882	-0.00195029	1.01631	0.995246	0.983953	1.00478	-2.53401	-0.249433	-0.175757	0.00956996	2.70977	0.239859
10500	2901	1	21600.5	41754.9	1463.35	40274.4	17.1482	146.971	3.50462	96.4543	0.0410688	0.0362705	0.409761	0.000426786	-0.00150378	1.01177	0.99633	0.98837	1.00368	-2.51762	-0.249913	-0.154215	0.00799394	2.67184	0.241924
10600	2919	1	21647.9	41835.8	1463.35	40369.2	3.25458	147.132	3.49784	96.4944	0.00777941	0.0363221	0.409592	0.000375171	-0.00133523	1.01033	0.99674	0.989777	1.00327	-2.51853	-0.249617	0.00777941	0.00242083	2.51075	0.247201
10700	2937	1	21686.1	41909.2	1463.35	40445.5	0.331239	147.262	3.49171	96.5075	0.000790373	0.0364023	0.409918	0.000294929	-0.00166062	1.0081	0.995949	0.991963	1.00407	-2.52045	-0.249511	0.000790373	-0.0055512	2.51966	0.255064
10800	2957	1	21722.2	41984	1463.35	40517.7	2.93727	147.385	3.48549	96.5075	0.00699617	0.0365122	0.408008	0.000185082	0.000248474	1.00507	1.00061	0.994957	0.999391	-2.45991	-0.250262	-0.248356	0.00321385	2.70828	0.247052
10900	2978	1	21780.1	42111.3	1463.35	40633.5	14.4885	147.581	3.47496	96.4906	0.0344053	0.0368867	0.407764	-0.000189474	0.000493046	0.994863	1.00121	1.00516	0.998792	-2.46369	-0.25363	0.0344053	0.0338784	2.42929	0.219752
11000	3004	1	21837	42231.4	1463.35	40747.4	20.647	147.774	3.46508	96.486	0.0488902	0.0365025	0.407892	0.000194749	0.000365034	1.00534	1.00089	0.994693	0.999106	-2.45988	-0.248406	0.0488902	-0.00389914	2.41099	0.2523
11100	3021	1	21848.5	42233.7	1463.35	40770.2	0.156152	147.812	3.46489	96.5347	0.000369734	0.0365616	0.407843	0.00013564	0.000413567	1.00371	1.00101	0.996304	0.998987	-2.45576	-0.249019	0.000369734	0.000369734	2.4554	0.248644
11200	3047	1	21946.4	42431.1	1463.35	40966.2	1.53675	148.143	3.44877	96.5476	0.00362175	0.0365524	0.406551	0.000144861	0.00170624	1.00396	1.0042	0.996053	0.995821	-2.41555	-0.247747	-0.0166322	0.000397575	2.43218	0.247339
11300	3068	1	22050.1	42728	1463.35	41173.4	91.209	148.493	3.4248	96.3617	0.213464	0.0364633	0.4078	0.00023397	0.00045699	1.00642	1.00112	0.993624	0.998881	-2.43763	-0.244693	0.213464	-0.0155155	2.22418	0.260216
11400	3099	1	22085.6	42709.7	1463.35	41244.6	1.78826	148.612	3.42627	96.5695	0.004187	0.0366585	0.407659	3.86981e-05	0.000597963	1.00106	1.00147	0.998945	0.998535	-2.42322	-0.246887	0.004187	-0.000289481	2.41903	0.24718
11500	3124	1	22104.6	42748.2	1463.35	41282.4	2.48195	148.676	3.42318	96.571	0.00580597	0.0367809	0.407688	-8.37022e-05	0.000568792	0.997724	1.0014	1.00228	0.998607	-2.42162	-0.247781	0.00580597	0.0039931	2.41582	0.243793
11600	3144	1	22114.6	42766.7	1463.35	41302.5	0.91717	148.71	3.4217	96.5762	0.00214459	0.0367484	0.407706	-5.11104e-05	0.000550952	0.998609	1.00135	1.00139	0.99865	-2.42066	-0.247143	0.00214459	-0.0033592	2.41853	0.250506
11700	3174	1	22145.9	42844.2	1463.35	41365	15.8634	148.815	3.41551	96.5475	0.0370257	0.0367925	0.407508	-9.52512e-05	0.000748584	0.997411	1.00184	1.0026	0.998166	-2.414	-0.24712	0.0370257	-0.000911053	2.37698	0.248026
11800	3190	1	22196.9	42940.8	1463.35	41467.2	10.2244	148.986	3.40783	96.5683	0.0238104	0.0367137	0.406425	-1.64224e-05	0.00183194	0.999553	1.00451	1.00045	0.995513	-2.38505	-0.245937	0.0238104	-0.000578549	2.36123	0.246506
11900	3206	1	22212.6	42976.9	1463.35	41498.6	14.9371	149.039	3.40497	96.5603	0.034756	0.0368081	0.406538	-0.000110861	0.00171869	0.996988	1.00423	1.00302	0.99579	-2.38592	-0.246455	0.034756	-0.000872287	2.35116	0.247325
12000	3217	1	22225.7	42993.8	1463.35	41524.6	5.81494	149.083	3.40363	96.5828	0.0135251	0.0368053	0.406515	-0.000108036	0.00174211	0.997065	1.00429	1.00294	0.995733	-2.38318	-0.246344	0.0135251	-0.000495489	2.36966	0.246844
12100	3228	1	22264.6	43069.3	1463.35	41602.4	3.52592	149.213	3.39766	96.5941	0.00818661	0.0368946	0.406026	-0.000197307	0.00223081	0.994652	1.00549	1.00538	0.994536	-2.36841	-0.246749	0.00818661	0.00368298	2.36021	0.243064
12200	3239	1	22280.4	43105.3	1463.35	41634.1	7.84979	149.266	3.39483	96.587	0.0182107	0.0369604	0.406058	-0.000263109	0.00219922	0.992881	1.00542	1.00717	0.994613	-2.36756	-0.24705	0.0182107	0.0036289	2.34934	0.243414
12300	3254	1	22314.1	43167.6	1463.35	41701.4	2.88001	149.379	3.38992	96.6034	0.00667169	0.0369383	0.405886	-0.00024109	0.00237039	0.993473	1.00584	1.00657	0.994194	-2.35977	-0.246528	0.00667169	0.00418049	2.35309	0.242338
12400	3269	1	22323	43186	1463.35	41719.4	3.23782	149.409	3.38849	96.604	0.00749739	0.0369719	0.405652	-0.000274658	0.0026044	0.992571	1.00642	1.00748	0.993621	-2.35397	-0.246688	0.00749739	0.00434159	2.34647	0.242347
12500	3283	1	22364.3	43268.1	1463.35	41801.9	2.83085	149.547	3.38205	96.6114	0.00654258	0.0369634	0.405899	-0.000266118	0.00235814	0.9928	1.00581	1.00725	0.994224	-2.35422	-0.246111	0.00654258	0.00365423	2.34769	0.242464
12600	3304	1	22388.5	43316.8	1463.35	41850.2	3.18147	149.628	3.37825	96.6144	0.00734467	0.0370388	0.405926	-0.000341544	0.00233089	0.990779	1.00574	1.00931	0.994291	-2.35204	-0.246504	0.00734467	0.00615551	2.34469	0.24035
12700	3320	1	22458.7	43464	1463.35	41990.7	9.95799	149.862	3.36681	96.6103	0.0229109	0.0369556	0.405405	-0.000258312	0.00285166	0.99301	1.00703	1.00704	0.993015	-2.33397	-0.24481	0.0229109	0.00105214	2.31106	0.243764
12800	3334	1	22490.9	43535.8	1463.35	42055.2	17.3194	149.97	3.36125	96.599	0.0397819	0.0369982	0.405519	-0.000300994	0.00273811	0.991865	1.00675	1.0082	0.993293	-2.33319	-0.244617	0.0397819	-0.00193853	2.2934	0.246559
12900	3352	1	22533.4	43623.9	1463.35	42140.1	20.4561	150.111	3.35446	96.5986	0.046892	0.0369913	0.405924	-0.000294075	0.00233277	0.99205	1.00575	1.00801	0.994286	-2.33683	-0.244032	0.046892	-0.00251471	2.28993	0.246545
13000	3377	1	22574.8	43696.4	1463.35	42222.9	10.1898	150.249	3.3489	96.6278	0.0233195	0.0369011	0.40589	-0.000203807	0.00236732	0.994477	1.00583	1.00555	0.994201	-2.33067	-0.242957	0.0233195	-0.00129738	2.30735	0.244257
13100	3395	1	22608.4	43756.9	1463.35	42290.1	3.46047	150.361	3.34427	96.6478	0.00790841	0.0369225	0.405984	-0.000225221	0.00227303	0.9939	1.0056	1.00614	0.994432	-2.32828	-0.243	0.00790841	0.00501619	2.32038	0.237988
13200	3414	1	22686.5	43910.5	1463.35	42446.2	0.886332	150.62	3.33258	96.6654	0.0020185	0.0367528	0.406093	-5.55374e-05	0.00216356	0.998489	1.00533	1.00151	0.9947	-2.32155	-0.240631	0.0020185	-0.000162033	2.31955	0.240798
13300	3430	1	22714.3	43968.8	1463.35	42501.9	3.50049	150.713	3.32816	96.6639	0.00796131	0.036713	0.406399	-1.57857e-05	0.00185838	0.99957	1.00457	1.00043	0.995448	-2.32479	-0.239979	0.00796131	-0.000638286	2.31683	0.240613
13400	3447	1	22758.6	44057	1463.35	42590.6	3.04434	150.86	3.32149	96.6716	0.00691001	0.0366574	0.406146	3.98525e-05	0.00211113	1.00109	1.0052	0.998914	0.994829	-2.31475	-0.239059	0.00691001	-0.000553078	2.30785	0.239612
13500	3457	1	22798.7	44142	1463.35	42670.6	8.02996	150.992	3.3151	96.6667	0.0181912	0.0366065	0.405582	9.077e-05	0.00267477	1.00248	1.00659	0.997527	0.993448	-2.29943	-0.238222	0.0181912	0.000207211	2.28125	0.238015
13600	3475	1	22822.4	44194.3	1463.35	42718.1	12.8199	151.071	3.31117	96.6598	0.029008	0.0365859	0.40526	0.000111344	0.00299727	1.00304	1.0074	0.996966	0.992658	-2.28585	-0.2378	-0.0586564	0.00091061	2.34451	0.236884
13700	3489	1	22844.4	44240.6	1463.35	42762.1	15.0566	151.144	3.30771	96.6583	0.0340336	0.036585	0.405069	0.000112245	0.00318757	1.00307	1.00787	0.996941	0.992192	-2.28219	-0.237556	-0.0117326	0.00146935	2.29392	0.236079
13800	3504	1	22912.6	44369.7	1463.35	42898.4	7.86693	151.369	3.29809	96.6842	0.0177304	0.0364542	0.40438	0.000243014	0.00387712	1.00667	1.00959	0.993378	0.990503	-2.26319	-0.2358	0.0177304	0.000151464	2.24545	0.235641
13900	3515	1	22941.1	44427.9	1463.35	42955.5	9.03613	151.463	3.29377	96.6859	0.0203389	0.0364081	0.404361	0.000289198	0.00389617	1.00794	1.00964	0.992119	0.990457	-2.25984	-0.235068	0.0203389	-0.00161551	2.23949	0.236682
14000	3530	1	23002.4	44570.8	1463.35	43078.2	29.3364	151.666	3.2832	96.651	0.0658197	0.036384	0.404602	0.000313267	0.00365454	1.00861	1.00903	0.991463	0.991048	-2.25952	-0.234112	0.0658197	-0.00155117	2.19369	0.235659
14100	3544	1	23042.4	44624.7	1463.35	43158.1	3.3131	151.797	3.27924	96.7133	0.00742436	0.0364302	0.404521	0.000267074	0.00373568	1.00733	1.00923	0.992722	0.99085	-2.25175	-0.23431	0.00742436	0.00262387	2.24433	0.231686
14200	3555	1	23076.6	44693.6	1463.35	43226.4	3.82783	151.91	3.27418	96.7172	0.00856461	0.0362853	0.404494	0.000411928	0.00376316	1.01135	1.0093	0.988775	0.990782	-2.24762	-0.232725	0.00856461	-0.000809113	2.23906	0.233525
14300	3563	1	23080.9	44702.8	1463.35	43235.1	4.39684	151.924	3.27351	96.7167	0.00983571	0.0362781	0.404449	0.000419101	0.00380784	1.01155	1.00941	0.98858	0.990673	-2.24633	-0.232626	0.00983571	-0.000679149	2.2365	0.2333
14400	3572	1	23125.4	44787.5	1463.35	43324.1	0.0507867	152.07	3.26732	96.7326	0.000113395	0.0362075	0.403707	0.000489729	0.00455018	1.01353	1.01127	0.986655	0.988855	-2.22685	-0.231663	0.000113395	-8.95385e-06	2.22674	0.231671
14500	3580	1	23174.7	44888.8	1463.35	43422.7	2.81946	152.232	3.25994	96.7338	0.00628098	0.036132	0.404341	0.000565241	0.00391593	1.01564	1.00968	0.984597	0.990408	-2.23422	-0.23054	0.00628098	-0.000494792	2.22794	0.231032
14600	3592	1	23179	44894.8	1463.35	43431.3	0.0783775	152.247	3.25951	96.7403	0.00017458	0.0361291	0.40437	0.000568144	0.00388685	1.01573	1.00961	0.984518	0.990479	-2.23414	-0.230503	0.00017458	-1.37525e-05	2.23396	0.230515
14700	3606	1	23214.5	44965.6	1463.35	43502.2	0	152.363	3.25438	96.7456	0	0.0360729	0.403946	0.000624328	0.00431069	1.01731	1.01067	0.982987	0.989441	-2.2222	-0.229708	0	0	2.2222	0.229705
14800	3612	1	23240.7	45018.1	1463.35	43554.7	0	152.449	3.25058	96.7494	0	0.0360004	0.404283	0.000696832	0.00397382	1.01936	1.00983	0.981011	0.990266	-2.22599	-0.228869	0	-0.00059663	2.226	0.229468
14900	3623	1	23248.9	45034.9	1463.35	43571.2	0.322981	152.476	3.24937	96.7499	0.000717179	0.0360254	0.404306	0.000671843	0.00395077	1.01865	1.00977	0.981692	0.990323	-2.22561	-0.228987	0.000717179	-1.30465e-05	2.2249	0.229003
15000	3635	1	23257.8	45052.3	1463.35	43589	0	152.505	3.24811	96.7519	0	0.0360141	0.404267	0.000683099	0.00398967	1.01897	1.00987	0.981386	0.990228	-2.22391	-0.228812	0	0	2.22392	0.228819
15100	3646	1	23305.1	45147.2	1463.35	43683.5	0.342533	152.66	3.24129	96.758	0.000758702	0.0359659	0.404826	0.000731392	0.00343101	1.02034	1.00848	0.98007	0.991596	-2.22985	-0.227953	0.000758702	-5.94688e-05	2.22909	0.228015
15200	3654	1	23311.1	45159.2	1463.35	43695.5	0.342533	152.68	3.24042	96.7588	0.0007585	0.0359572	0.404902	0.000740025	0.00335486	1.02058	1.00829	0.979834	0.991782	-2.2307	-0.227826	0.0007585	-5.94373e-05	2.22995	0.227888
15300	3658	1	23312.1	45161.1	1463.35	43697.5	0.342533	152.683	3.24029	96.759	0.000758467	0.0359557	0.404816	0.000741536	0.00344042	1.02062	1.0085	0.979793	0.991573	-2.22894	-0.227805	0.000758467	-5.94321e-05	2.22819	0.227866
15400	3663	1	23317.6	45172.2	1463.35	43708.5	0.342533	152.701	3.2395	96.7597	0.000758282	0.0359832	0.404887	0.000714067	0.00337016	1.01984	1.00832	0.980542	0.991745	-2.22973	-0.227952	0.000758282	-5.94654e-05	2.22898	0.228016
15500	3670	1	23323.1	45184.9	1463.35	43719.6	2.04006	152.719	3.23858	96.7569	0.0045149	0.036024	0.404941	0.000673267	0.00331597	1.01869	1.00819	0.981653	0.991878	-2.23032	-0.228179	0.0045149	-0.000354473	2.22582	0.228538
15600	3681	1	23338.1	45215.2	1463.35	43749.5	2.32732	152.768	3.23641	96.7584	0.00514721	0.0360322	0.405086	0.000665046	0.0031706	1.01846	1.00783	0.981877	0.992234	-2.23161	-0.2281	0.00514721	0.000159548	2.22647	0.227947
15700	3692	1	23346.7	45233.8	1463.35	43766.7	3.78358	152.796	3.23508	96.7566	0.0083645	0.0360196	0.405032	0.000677627	0.00322486	1.01881	1.00796	0.981535	0.992101	-2.22976	-0.227902	0.0083645	-7.62164e-05	2.22141	0.227983
15800	3710	1	23367	45271.8	1463.35	43807.3	1.14946	152.863	3.23236	96.7651	0.00253903	0.0360035	0.40513	0.000693749	0.00312687	1.01927	1.00772	0.981095	0.992341	-2.22937	-0.22758	0.00253903	-0.000199216	2.22684	0.227783
15900	3721	1	23369.6	45276.5	1463.35	43812.6	0.609246	152.871	3.23203	96.7666	0.00134561	0.0360431	0.405157	0.000654141	0.00309975	1.01815	1.00765	0.982175	0.992407	-2.22958	-0.227852	0.00134561	-0.000105703	2.22824	0.227963
16000	3727	1	23379.3	45298.3	1463.35	43832	2.98299	152.903	3.23047	96.7629	0.0065852	0.0360279	0.405274	0.000669379	0.00298333	1.01858	1.00736	0.981759	0.992693	-2.231	-0.227612	0.0065852	-0.000517025	2.22442	0.228136
16100	3733	1	23386.2	45314.2	1463.35	43845.7	5.17928	152.925	3.22934	96.7592	0.0114297	0.0360171	0.405205	0.000680111	0.00305164	1.01888	1.00753	0.981467	0.992525	-2.22912	-0.227437	0.0114297	-0.000897043	2.2177	0.22834
16200	3740	1	23396.7	45333.2	1463.35	43866.8	3.09515	152.96	3.22799	96.7652	0.00682756	0.0360006	0.404998	0.000696656	0.00325862	1.01935	1.00805	0.981016	0.992018	-2.22388	-0.227228	0.00682756	-0.000535608	2.21706	0.227768
16300	3746	1	23434.8	45418.7	1463.35	43942.8	12.5275	153.084	3.22191	96.7505	0.0275822	0.0359411	0.40462	0.000756107	0.00363697	1.02104	1.00899	0.979396	0.991091	-2.21334	-0.226292	0.0275822	-0.00215938	2.18576	0.228455
16400	3752	1	23450.1	45447	1463.35	43973.5	10.1421	153.134	3.2199	96.7578	0.0223163	0.0359171	0.404451	0.000780104	0.00380635	1.02172	1.00941	0.978742	0.990677	-2.20833	-0.225982	0.0223163	-0.00174594	2.18603	0.227732
16500	3759	1	23468.1	45482	1463.35	44009.5	9.10797	153.193	3.21743	96.7625	0.0200254	0.0358891	0.404241	0.000808154	0.00401588	1.02252	1.00993	0.977978	0.990163	-2.2024	-0.225602	0.0200254	-0.00156542	2.18238	0.227171
16600	3773	1	23513.9	45566.8	1463.35	44101.2	2.23825	153.343	3.21144	96.7836	0.00491203	0.0358767	0.403621	0.000820555	0.00463542	1.02287	1.01148	0.97764	0.988646	-2.18541	-0.225116	0.00491203	-0.000383878	2.18051	0.225504
16700	3777	1	23520.6	45580.1	1463.35	44114.5	2.23825	153.364	3.2105	96.7846	0.00491059	0.0358664	0.403472	0.000830896	0.00478458	1.02317	1.01186	0.977358	0.98828	-2.1819	-0.224972	0.00491059	-0.000383645	2.17699	0.225359
16800	3783	1	23556.1	45650.7	1463.35	44185.5	1.82273	153.48	3.20554	96.7905	0.00399277	0.0358149	0.402795	0.000882384	0.00546152	1.02464	1.01356	0.975955	0.986622	-2.16545	-0.224249	0.00399277	7.16726e-05	2.16145	0.224184
16900	3792	1	23568.2	45674.5	1463.35	44209.7	1.38273	153.519	3.20387	96.7931	0.00302737	0.035798	0.402949	0.00089925	0.00530814	1.02512	1.01317	0.975495	0.986998	-2.16711	-0.224014	0.00302737	0.000347398	2.16409	0.223677
17000	3803	1	23624.1	45786.4	1463.35	44321.5	1.47985	153.701	3.19604	96.8007	0.00323207	0.0357363	0.401967	0.000960973	0.00629011	1.02689	1.01565	0.973813	0.984593	-2.14303	-0.223003	0.00323207	0.000559017	2.13981	0.222454
17100	3816	1	23637.7	45812.8	1463.35	44348.6	0.776463	153.745	3.1942	96.8041	0.00169486	0.0357335	0.401921	0.000963725	0.00633559	1.02697	1.01576	0.973738	0.984481	-2.1408	-0.222839	0.00169486	0.000236791	2.1391	0.222609
17200	3827	1	23653.5	45844	1463.35	44380.3	0.388151	153.797	3.19202	96.8071	0.000846677	0.0357239	0.401833	0.000973369	0.00642436	1.02725	1.01599	0.973476	0.984264	-2.13755	-0.222613	0.000846677	0.000302552	2.1367	0.222316
17300	3837	1	23663.1	45862.9	1463.35	44399.5	0.064756	153.828	3.19071	96.8092	0.000141195	0.0356945	0.401695	0.00100279	0.00656143	1.02809	1.01633	0.972674	0.983928	-2.13402	-0.222297	0.000141195	0.000115581	2.13387	0.222186
17400	3849	1	23681.3	45899.8	1463.35	44435.8	0.560405	153.887	3.18814	96.8106	0.00122093	0.0356843	0.401548	0.00101294	0.00670933	1.02839	1.01671	0.972397	0.983566	-2.1295	-0.222076	0.00122093	0.00122093	2.12828	0.220857
17500	3862	1	23695.9	45928.5	1463.35	44465.1	0	153.935	3.18615	96.8139	0	0.0356632	0.401547	0.00103407	0.00670955	1.029	1.01671	0.971822	0.983565	-2.12803	-0.221736	0	0	2.12803	0.22174
17600	3875	1	23705.9	45949	1463.35	44485.1	0.529879	153.967	3.18473	96.8141	0.00115319	0.0356595	0.401527	0.00103775	0.00672989	1.0291	1.01676	0.971721	0.983516	-2.12672	-0.221647	0.00115319	0.00115319	2.12556	0.220498
17700	3888	1	23725.3	45990	1463.35	44523.9	2.70418	154.03	3.18189	96.8122	0.00587993	0.0356308	0.401425	0.00106644	0.0068321	1.02993	1.01702	0.97094	0.983265	-2.12307	-0.221179	0.00587993	-0.000456046	2.11719	0.221642
17800	3902	1	23747.6	46032	1463.35	44568.5	0.0759067	154.103	3.17899	96.8209	0.0001649	0.0356001	0.401396	0.0010971	0.00686129	1.03082	1.01709	0.970104	0.983194	-2.12018	-0.220761	0.0001649	-1.27784e-05	2.12001	0.220781
17900	3917	1	23763.7	46064.6	1463.35	44600.7	0.529035	154.155	3.17674	96.8221	0.00114846	0.0355769	0.401319	0.00112033	0.00693764	1.03149	1.01729	0.969471	0.983007	-2.11723	-0.220428	0.00114846	-8.89319e-05	2.11608	0.220519
18000	3929	1	23775.2	46087.3	1463.35	44623.6	0.384275	154.192	3.17517	96.824	0.000833797	0.0355632	0.401188	0.00113408	0.00706893	1.03189	1.01762	0.969096	0.982685	-2.11368	-0.220216	0.000833797	-6.45383e-05	2.11284	0.220283
18100	3941	1	23778.2	46093	1463.35	44629.7	0.0146267	154.202	3.17478	96.8252	3.1733e-05	0.0355606	0.401213	0.00113668	0.0070443	1.03196	1.01756	0.969026	0.982745	-2.11382	-0.220164	3.1733e-05	-0.000218961	2.11378	0.220385
18200	3951	1	23782.5	46101.6	1463.35	44638.2	0.0107867	154.216	3.17419	96.8258	2.33977e-05	0.0355546	0.401262	0.00114262	0.00699439	1.03214	1.01743	0.968864	0.982868	-2.11433	-0.220086	2.33977e-05	-1.81058e-06	2.1143	0.22009
18300	3957	1	23810.2	46157	1463.35	44693.7	0	154.306	3.17037	96.8296	0	0.0355125	0.401605	0.00118479	0.00665235	1.03336	1.01656	0.967714	0.983705	-2.11802	-0.219506	0	0	2.11801	0.21951
18400	3966	1	23811.8	46160.2	1463.35	44696.8	0	154.311	3.17016	96.8298	0	0.0355138	0.401026	0.00118342	0.00723078	1.03332	1.01803	0.967752	0.982289	-2.10712	-0.219501	0	0	2.10712	0.219506
18500	3979	1	23825.1	46186.8	1463.35	44723.4	0	154.354	3.16833	96.8317	0	0.0354959	0.400929	0.00120138	0.00732761	1.03385	1.01828	0.967262	0.982051	-2.10405	-0.21924	0	0	2.10404	0.219245
18600	3990	1	23884.7	46306	1463.35	44842.6	0	154.547	3.16017	96.8398	0	0.0354276	0.40009	0.00126964	0.008167	1.03584	1.02041	0.965402	0.979995	-2.08288	-0.218163	0	0	2.08288	0.218168
18700	4001	1	23908	46352.9	1463.35	44889.2	0.28025	154.622	3.15698	96.8424	0.000604601	0.0354762	0.399987	0.00122108	0.00826955	1.03442	1.02067	0.966725	0.979744	-2.07882	-0.218307	0.000604601	0.000604601	2.07821	0.217707
18800	4007	1	23912.2	46361.3	1463.35	44897.7	0.288117	154.636	3.1564	96.843	0.000621459	0.0354746	0.40002	0.00122269	0.0082367	1.03447	1.02059	0.966682	0.979825	-2.07902	-0.218255	0.000621459	0.000621459	2.0784	0.21764
18900	4015	1	23974.7	46486.3	1463.35	45022.7	0.288117	154.838	3.14792	96.8515	0.000619788	0.0353808	0.39882	0.00131643	0.0094372	1.03721	1.02366	0.964127	0.976884	-2.05124	-0.216972	0.000619788	0.000619788	2.0506	0.216359
19000	4022	1	23982.6	46502.1	1463.35	45038.4	0.288117	154.863	3.14685	96.8525	0.000619578	0.0353845	0.398918	0.00131272	0.00933845	1.0371	1.02341	0.964228	0.977126	-2.0523	-0.216923	0.000619578	0.000619578	2.05167	0.21631
19100	4029	1	23988	46512.9	1463.35	45049.3	0.288117	154.881	3.14612	96.8533	0.000619434	0.0353764	0.398967	0.00132086	0.00929009	1.03734	1.02329	0.964007	0.977244	-2.05268	-0.216812	0.000619434	0.000619434	2.05205	0.216199
19200	4044	1	24037.9	46612.4	1463.35	45149.1	0.0049867	155.042	3.1394	96.8606	1.06982e-05	0.0354518	0.39826	0.00124549	0.00999701	1.03513	1.0251	0.96606	0.975513	-2.03523	-0.216856	1.06982e-05	1.06982e-05	2.03521	0.216848
19300	4053	1	24051.8	46640.2	1463.35	45176.8	0.0049867	155.086	3.13753	96.8625	1.06919e-05	0.0354348	0.398241	0.00126248	0.0100156	1.03563	1.02515	0.965597	0.975467	-2.03362	-0.216601	1.06919e-05	1.06919e-05	2.0336	0.216592
19400	4065	1	24060.1	46656.9	1463.35	45193.5	0	155.113	3.13641	96.8636	0	0.035432	0.39827	0.00126526	0.00998662	1.03571	1.02507	0.965522	0.975538	-2.03338	-0.2165	0	0	2.03338	0.216502
19500	4088	1	24069.2	46675	1463.35	45211.6	0	155.142	3.13519	96.8648	0	0.0354254	0.398237	0.00127186	0.0100197	1.0359	1.02516	0.965342	0.975457	-2.03196	-0.216366	0	0	2.03195	0.216368
19600	4097	1	24084	46704.7	1463.35	45241.3	0	155.19	3.1332	96.8668	0	0.0354683	0.39828	0.00122897	0.00997678	1.03465	1.02505	0.96651	0.975562	-2.03138	-0.216532	0	0	2.03137	0.216532
19700	4108	1	24086.2	46709	1463.35	45245.6	0	155.197	3.13291	96.8671	0	0.0354723	0.398273	0.00122492	0.0099842	1.03453	1.02507	0.966621	0.975544	-2.03105	-0.216541	0	0	2.03104	0.21654
19800	4123	1	24092.4	46721.4	1463.35	45258.1	0	155.217	3.13208	96.8679	0	0.0354818	0.398348	0.00121543	0.00990865	1.03425	1.02487	0.96688	0.975729	-2.03184	-0.216549	0	0	2.03183	0.216551
19900	4133	1	24098.7	46734	1463.35	45270.6	0	155.237	3.13123	96.8688	0	0.0354831	0.398238	0.00121416	0.0100186	1.03422	1.02516	0.966914	0.97546	-2.02928	-0.216498	0	0	2.02927	0.2165
20000	4144	1	24102.2	46741	1463.35	45277.6	0	155.249	3.13077	96.8692	0	0.035503	0.398236	0.0011942	0.0100205	1.03364	1.02516	0.967458	0.975455	-2.02893	-0.216608	0	0	2.02892	0.216607
20100	4149	1	24103.1	46742.8	1463.35	45279.5	0	155.252	3.13064	96.8694	0	0.0355089	0.398248	0.00118832	0.010009	1.03347	1.02513	0.967618	0.975484	-2.02906	-0.216641	0	0	2.02904	0.216641
20200	4158	1	24105.6	46747.8	1463.35	45284.5	0	155.26	3.13031	96.8697	0	0.0355243	0.398264	0.00117294	0.00999285	1.03302	1.02509	0.968037	0.975523	-2.02912	-0.216728	0	0	2.0291	0.216727
20300	4163	1	24107	46750.7	1463.35	45287.3	0	155.264	3.13012	96.8699	0	0.035524	0.398282	0.00117328	0.00997508	1.03303	1.02505	0.968028	0.975567	-2.02931	-0.216712	0	0	2.0293	0.216711
20400	4172	1	24108.2	46753.1	1463.35	45289.8	0	155.268	3.12995	96.87	0	0.0355359	0.398294	0.00116136	0.00996329	1.03268	1.02501	0.968353	0.975596	-2.02941	-0.216785	0	0	2.0294	0.216785
20500	4181	1	24114.4	46765.4	1463.35	45302.1	0	155.288	3.12913	96.8709	0	0.035538	0.39837	0.00115923	0.00988654	1.03262	1.02482	0.968411	0.975784	-2.03023	-0.216742	0	0	2.03022	0.216742
20600	4191	1	24118.1	46772.8	1463.35	45309.4	0	155.3	3.12864	96.8714	0	0.0355527	0.398416	0.00114451	0.00984075	1.03219	1.0247	0.968812	0.975896	-2.03072	-0.216812	0	0	2.03071	0.216813
20700	4199	1	24124.3	46785.3	1463.35	45321.9	0	155.32	3.1278	96.8722	0	0.0356265	0.398494	0.00107074	0.00976283	1.03005	1.0245	0.970822	0.976087	-2.03156	-0.217281	0	0	2.03155	0.217285
20800	4207	1	24127.5	46791.6	1463.35	45328.3	0	155.33	3.12738	96.8726	0	0.0356295	0.398534	0.00106774	0.00972334	1.02997	1.0244	0.970904	0.976183	-2.03198	-0.217272	0	0	2.03197	0.217276
20900	4216	1	24140.4	46817.5	1463.35	45354.2	0	155.372	3.12565	96.8744	0	0.0356325	0.398695	0.00106471	0.00956197	1.02988	1.02398	0.970987	0.976579	-2.03371	-0.21717	0	0	2.0337	0.217169
21000	4224	1	24149.3	46835.2	1463.35	45371.9	0	155.4	3.12447	96.8755	0	0.0356953	0.398805	0.00100191	0.00945188	1.02807	1.0237	0.972698	0.976848	-2.03489	-0.217535	0	0	2.03488	0.217533

## Sheet: AP_CH
DIST	NL	NC	IICnum	Sum_varIIC	Sum_varIICintra	Sum_varIICflux	Sum_varIICconnector	eciic	thetaiicintra	thetaiicflux	thetaiicconnector
100	22	68	1821.93	2278.9	1452.42	739.015	87.4711	42.684	63.7333	32.4285	3.8383
200	43	54	1907.24	2502.57	1452.42	909.63	140.524	43.6719	58.0371	36.3478	5.6152
300	71	40	2052.63	2808.36	1452.42	1200.43	155.512	45.306	51.7178	42.7448	5.53746
400	101	32	2419.33	3657.15	1452.42	1933.81	270.921	49.1867	39.7145	52.8776	7.40797
500	131	27	2753.61	4563.11	1452.42	2602.39	508.303	52.4749	31.8296	57.031	11.1394
600	158	23	3264.89	6305.91	1452.42	3624.94	1228.55	57.1392	23.0327	57.4848	19.4826
700	176	22	3354.36	6221.23	1452.42	3803.89	964.92	57.9169	23.3462	61.1437	15.5101
800	201	16	3407.72	5967.38	1452.42	3910.59	604.369	58.3756	24.3393	65.5328	10.1279
900	234	11	4182.52	8723.87	1452.42	5460.2	1811.25	64.6724	16.6488	62.5892	20.762
1000	252	8	5068.13	12263.5	1452.42	7231.42	3579.66	71.1908	11.8434	58.967	29.1896
1100	273	8	5285.56	10967.4	1452.42	7666.27	1848.72	72.7018	13.2431	69.9005	16.8565
1200	294	8	5376.58	10687.3	1452.42	7848.31	1386.54	73.3251	13.5902	73.436	12.9738
1300	323	8	5550.01	10194	1452.42	8195.17	546.362	74.4984	14.2479	80.3925	5.35967
1400	350	7	5845.61	10521.3	1452.42	8786.38	282.49	76.4566	13.8046	83.5105	2.68494
1500	381	5	7646.08	18998.1	1452.42	12387.3	5158.4	87.4419	7.64507	65.2028	27.1521
1600	413	5	7820.23	15967.4	1452.42	12735.6	1779.39	88.4321	9.09614	79.76	11.1439
1700	443	5	8073.96	16625.1	1452.42	13243.1	1929.57	89.8552	8.73632	79.6573	11.6064
1800	475	5	8330.38	17260.2	1452.42	13755.9	2051.9	91.2709	8.41483	79.6972	11.888
1900	515	5	8523.9	17700.2	1452.42	14143	2104.85	92.325	8.20565	79.9027	11.8917
2000	535	5	8823.32	18711.6	1452.42	14741.8	2517.4	93.9325	7.76213	78.7842	13.4537
2100	571	5	9098.11	19055.1	1452.42	15291.4	2311.3	95.384	7.62222	80.2482	12.1296
2200	600	5	9214.49	19308.5	1452.42	15524.1	2331.94	95.9921	7.52218	80.4006	12.0773
2300	623	5	9302.32	19543.1	1452.42	15699.8	2390.88	96.4485	7.43188	80.3343	12.2339
2400	644	5	9364.79	19651.4	1452.42	15824.7	2374.26	96.7719	7.39092	80.5272	12.0819
2500	671	4	10141	22404	1452.42	17377.2	3574.4	100.703	6.48286	77.5629	15.9543
2600	686	4	10267.9	22304.5	1452.42	17630.9	3221.11	101.331	6.5118	79.0467	14.4415
2700	711	3	10387.1	19678.3	1452.42	17869.3	356.548	101.917	7.38084	90.8073	1.81189
2800	735	3	10520.9	19926.2	1452.42	18137	336.786	102.572	7.28899	91.0209	1.69016
2900	756	3	10629.6	20148.4	1452.42	18354.4	341.49	103.1	7.20863	91.0965	1.69488
3000	786	3	10710.8	20147.6	1452.42	18516.8	178.331	103.493	7.2089	91.906	0.885121
3100	814	3	10851.7	20613.1	1452.42	18798.5	362.23	104.171	7.04609	91.1966	1.75727
3200	845	2	12682.3	27311.6	1452.42	22459.8	3399.35	112.616	5.31796	82.2355	12.4465
3300	867	2	12738.6	27390.6	1452.42	22572.3	3365.9	112.865	5.30262	82.4089	12.2885
3400	892	2	13006.9	26471.5	1452.42	23108.9	1910.2	114.048	5.48673	87.2972	7.21605
3500	921	2	13221.3	26933	1452.42	23537.7	1942.91	114.984	5.39271	87.3934	7.21385
3600	944	2	13419.7	27343	1452.42	23934.6	1956.06	115.843	5.31185	87.5344	7.15379
3700	970	2	13577.4	27683	1452.42	24249.9	1980.67	116.522	5.24662	87.5985	7.15485
3800	1000	2	13697.4	27914.8	1452.42	24489.9	1972.45	117.036	5.20306	87.731	7.06596
3900	1028	2	13740.3	27969.4	1452.42	24575.8	1941.13	117.219	5.19289	87.8669	6.94021
4000	1057	2	14017.7	28748.9	1452.42	25130.5	2166	118.396	5.05209	87.4137	7.53421
4100	1083	2	14179.7	28933.2	1452.42	25454.5	2026.23	119.078	5.01992	87.9769	7.00315
4200	1104	2	14281.2	29161	1452.42	25657.5	2051.1	119.504	4.98069	87.9856	7.03371
4300	1128	2	14328.6	29197.4	1452.42	25752.3	1992.66	119.702	4.97449	88.2007	6.8248
4400	1149	2	14399.3	29295.9	1452.42	25893.8	1949.69	119.997	4.95775	88.3871	6.65515
4500	1170	2	14684.8	30194.5	1452.42	26464.8	2277.28	121.181	4.81021	87.6478	7.54203
4600	1192	2	14903.9	28770.4	1452.42	26903	414.989	122.082	5.04832	93.5093	1.44242
4700	1213	2	15032.4	28977.2	1452.42	27159.9	364.869	122.607	5.01229	93.7286	1.25916
4800	1230	2	15157	29185.9	1452.42	27409.2	324.285	123.114	4.97644	93.9125	1.1111
4900	1261	2	15234.8	29240.3	1452.42	27564.7	223.227	123.429	4.96718	94.2694	0.763421
5000	1289	2	15615.4	30020.4	1452.42	28326	241.981	124.962	4.83811	94.3558	0.806056
5100	1317	2	15693.3	30129.5	1452.42	28481.7	195.362	125.273	4.8206	94.531	0.648409
5200	1352	2	15786.8	30281.9	1452.42	28668.8	160.695	125.646	4.79633	94.673	0.530665
5300	1380	2	15855.9	30424.4	1452.42	28807	164.954	125.92	4.77386	94.684	0.542175
5400	1407	2	16067.5	30811.6	1452.42	29230.2	129.038	126.758	4.71387	94.8673	0.418797
5500	1425	2	16107.5	30909.6	1452.42	29310.2	147.011	126.915	4.69893	94.8255	0.475616
5600	1445	2	16192.9	31090	1452.42	29481	156.625	127.251	4.67166	94.8246	0.50378
5700	1470	2	16439.5	31554.7	1452.42	29974.2	128.07	128.217	4.60287	94.9913	0.405867
5800	1491	2	16517.1	31641.5	1452.42	30129.4	59.7552	128.519	4.59023	95.2209	0.188851
5900	1511	2	16607.3	31818.8	1452.42	30309.9	56.5111	128.869	4.56466	95.2577	0.177603
6000	1532	2	16679.7	31996.6	1452.42	30454.7	89.537	129.15	4.53929	95.1809	0.279833
6100	1556	2	16731.3	32045.7	1452.42	30557.8	35.4671	129.35	4.53234	95.357	0.110676
6200	1580	2	16787.1	32137.9	1452.42	30669.3	16.1314	129.565	4.51934	95.4305	0.0501945
6300	1608	2	16843.3	32285.6	1452.42	30781.8	51.4173	129.782	4.49866	95.3421	0.159257
6400	1630	2	16879.4	32350.2	1452.42	30854.1	43.6862	129.921	4.48969	95.3753	0.135042
6500	1659	2	16945	32457.2	1452.42	30985.1	19.6542	130.173	4.47488	95.4646	0.0605541
6600	1690	2	17069.8	32782.7	1452.42	31234.8	95.4079	130.652	4.43045	95.2785	0.291032
6700	1715	2	17106.4	32825.6	1452.42	31308	65.2121	130.791	4.42466	95.3767	0.198662
6800	1739	2	17137.6	32869.6	1452.42	31370.3	46.9025	130.911	4.41873	95.4386	0.142692
6900	1756	2	17151.9	32890.7	1452.42	31398.9	39.392	130.965	4.4159	95.4643	0.119766
7000	1780	2	17233	33105.4	1452.42	31561.2	91.7321	131.275	4.38727	95.3356	0.277091
7100	1799	2	17268.7	33137.1	1452.42	31632.6	52.1261	131.41	4.38306	95.4596	0.157304
7200	1822	2	17354.3	33302	1452.42	31803.7	45.9212	131.736	4.36135	95.5008	0.137893
7300	1837	2	17379.8	33342.3	1452.42	31854.7	35.2535	131.832	4.35608	95.5382	0.105732
7400	1864	2	17447.3	33479	1452.42	31989.8	36.7534	132.088	4.33831	95.5519	0.109781
7500	1885	2	17488.9	33569.7	1452.42	32072.9	44.4173	132.245	4.32658	95.5411	0.132314
7600	1906	2	17542.9	33660	1452.42	32181	26.5518	132.45	4.31498	95.6061	0.0788824
7700	1922	2	17559.8	33683.6	1452.42	32214.8	16.3936	132.513	4.31195	95.6394	0.0486693
7800	1943	2	17627	33804.3	1452.42	32349.1	2.8112	132.767	4.29656	95.6951	0.00831611
7900	1960	2	17708.4	33986.9	1452.42	32512	22.4745	133.073	4.27347	95.6604	0.0661271
8000	1977	2	17734	34021.3	1452.42	32563.2	5.67309	133.169	4.26915	95.7142	0.0166751
8100	1995	2	17799.9	34153	1452.42	32695	5.62611	133.416	4.25269	95.7308	0.0164733
8200	2012	2	17841.5	34249.9	1452.42	32778.2	19.2916	133.572	4.24065	95.703	0.056326
8300	2030	2	17901.1	34375.5	1452.42	32897.5	25.6701	133.795	4.22516	95.7002	0.0746754
8400	2050	2	17990	34534.6	1452.42	33075.2	6.96605	134.127	4.2057	95.7741	0.0201712
8500	2073	2	18063.1	34676.2	1452.42	33221.3	2.53065	134.399	4.18852	95.8042	0.00729794
8600	2093	2	18162.6	34880.7	1452.42	33420.4	7.90238	134.769	4.16396	95.8134	0.0226554
8700	2115	2	18240.3	35035.3	1452.42	33575.8	7.01986	135.057	4.14559	95.8344	0.0200366
8800	2131	2	18316.6	35228.1	1452.42	33728.3	47.3137	135.339	4.12291	95.7428	0.134307
8900	2141	2	18350.6	35266.1	1452.42	33796.3	17.3321	135.464	4.11846	95.8324	0.0491465
9000	2154	2	18367.3	35299.3	1452.42	33829.8	17.0346	135.526	4.11459	95.8371	0.0482576
9100	2177	2	18445.5	35448.2	1452.42	33986.1	9.70414	135.814	4.0973	95.8753	0.0273755
9200	2201	2	18553	35667.4	1452.42	34201.2	13.8034	136.21	4.07212	95.8892	0.0387003
9300	2214	2	18580.1	35713.4	1452.42	34255.3	5.6834	136.309	4.06688	95.9172	0.0159139
9400	2235	2	18597.7	35750	1452.42	34290.5	7.08451	136.373	4.06271	95.9175	0.0198168
9500	2253	1	19334	37233.5	1452.42	35763.2	17.9542	139.047	3.90084	96.0509	0.0482204
9600	2278	1	19402.5	37370	1452.42	35900.1	17.42	139.293	3.8866	96.0668	0.0466151
9700	2302	1	19573.1	37746.9	1452.42	36241.3	53.1555	139.904	3.84779	96.0114	0.140821
9800	2317	1	19588.6	37781.5	1452.42	36272.4	56.6854	139.959	3.84426	96.0057	0.150035
9900	2334	1	19651.9	37883.9	1452.42	36398.9	32.5557	140.185	3.83387	96.0802	0.0859355
10000	2351	1	19741.2	38092.4	1452.42	36577.6	62.3604	140.503	3.81289	96.0234	0.163708
10100	2366	1	19823.9	38236.2	1452.42	36743	40.7188	140.798	3.79855	96.095	0.106493
10200	2380	1	19837.2	38263.2	1452.42	36769.5	41.1968	140.845	3.79587	96.0965	0.107667
10300	2393	1	19853.7	38281.4	1452.42	36802.5	26.4086	140.903	3.79407	96.1369	0.0689855
10400	2408	1	20003.4	38582.2	1452.42	37101.9	27.8442	141.433	3.76448	96.1634	0.0721686
10500	2426	1	20062	38684.4	1452.42	37219.2	12.7948	141.64	3.75454	96.2124	0.0330749
10600	2442	1	20103.9	38757.5	1452.42	37303	2.07685	141.788	3.74746	96.2472	0.00535858
10700	2457	1	20136	38822.1	1452.42	37367.2	2.46193	141.901	3.74122	96.2524	0.00634157
10800	2472	1	20164.9	38878.9	1452.42	37425	1.47052	142.003	3.73576	96.2605	0.00378232
10900	2486	1	20202.9	38953.6	1452.42	37501	0.205229	142.137	3.72859	96.2709	0.000526854
11000	2510	1	20271.9	39112.1	1452.42	37639	20.647	142.379	3.71348	96.2337	0.0527893
11100	2523	1	20280	39107.6	1452.42	37655.2	0	142.408	3.7139	96.2861	0
11200	2546	1	20371.4	39291.6	1452.42	37837.9	1.26683	142.728	3.69652	96.3003	0.00322418
11300	2567	1	20471.3	39580.9	1452.42	38037.8	90.6323	143.078	3.6695	96.1015	0.22898
11400	2592	1	20496.1	39541.5	1452.42	38087.3	1.77007	143.164	3.67316	96.3224	0.00447648
11500	2610	1	20508.4	39565.1	1452.42	38112	0.717267	143.208	3.67096	96.3272	0.00181288
11600	2628	1	20519.1	39587.9	1452.42	38133.3	2.17884	143.245	3.66884	96.3257	0.00550379
11700	2653	1	20546.2	39655.1	1452.42	38187.6	15.0439	143.34	3.66263	96.2994	0.0379367
11800	2668	1	20597	39751.3	1452.42	38289.2	9.69491	143.517	3.65377	96.3218	0.0243889
11900	2681	1	20607.5	39776.8	1452.42	38310.2	14.1718	143.553	3.65143	96.3129	0.0356283
12000	2691	1	20619.7	39792.6	1452.42	38334.6	5.57915	143.596	3.64998	96.336	0.0140206
12100	2699	1	20652	39853.3	1452.42	38399.1	1.79485	143.708	3.64441	96.3511	0.00450363
12200	2707	1	20663.8	39881.1	1452.42	38422.9	5.81539	143.749	3.64188	96.3435	0.0145818
12300	2720	1	20696	39940.6	1452.42	38487.2	0.995002	143.861	3.63645	96.3611	0.00249121
12400	2730	1	20702.9	39954.6	1452.42	38501	1.26089	143.885	3.63517	96.3617	0.0031558
12500	2741	1	20741.6	40031.9	1452.42	38578.3	1.15626	144.019	3.62816	96.3689	0.00288834
12600	2759	1	20760.7	40069.5	1452.42	38616.6	0.476488	144.086	3.62476	96.3741	0.00118916
12700	2771	1	20829.4	40215.2	1452.42	38754	8.79055	144.324	3.61162	96.3665	0.0218588
12800	2781	1	20857.5	40279.3	1452.42	38810.1	16.8047	144.421	3.60587	96.3524	0.0417204
12900	2796	1	20897.2	40361.9	1452.42	38889.5	19.9414	144.559	3.5985	96.3521	0.0494067
13000	2817	1	20939.5	40436.5	1452.42	38974.1	9.95419	144.705	3.59186	96.3835	0.0246169
13100	2831	1	20969.7	40488.1	1452.42	39034.5	1.171	144.809	3.58727	96.4098	0.00289221
13200	2846	1	21049.5	40647.5	1452.42	39194.2	0.886332	145.085	3.57321	96.4246	0.00218053
13300	2860	1	21077.1	40705.3	1452.42	39249.4	3.50049	145.18	3.56813	96.4233	0.0085996
13400	2873	1	21120.7	40792	1452.42	39336.5	3.04434	145.33	3.56055	96.432	0.00746309
13500	2882	1	21160.1	40875	1452.42	39415.3	7.35096	145.465	3.55332	96.4287	0.017984
13600	2898	1	21183	40925.1	1452.42	39461.2	11.4989	145.544	3.54897	96.4229	0.0280974
13700	2910	1	21203.5	40967.9	1452.42	39502.1	13.3409	145.614	3.54527	96.4222	0.0325642
13800	2923	1	21272.5	41099.8	1452.42	39640.2	7.22492	145.851	3.53389	96.4485	0.017579
13900	2934	1	21301	41158.7	1452.42	39697.2	9.03613	145.949	3.52883	96.4492	0.0219544
14000	2948	1	21359	41293.5	1452.42	39813.2	27.8198	146.147	3.51731	96.4153	0.0673708
14100	2962	1	21394.1	41337.7	1452.42	39883.3	1.98441	146.267	3.51355	96.4817	0.00480049
14200	2971	1	21432.3	41416	1452.42	39959.7	3.88222	146.398	3.50691	96.4837	0.00937372
14300	2979	1	21436.6	41425.2	1452.42	39968.4	4.3558	146.412	3.50613	96.4834	0.0105149
14400	2988	1	21481.1	41509.8	1452.42	40057.4	0.0507867	146.564	3.49898	96.5009	0.000122349
14500	2995	1	21530.2	41610.9	1452.42	40155.6	2.81946	146.732	3.49048	96.5027	0.00677577
14600	3005	1	21534.4	41616.5	1452.42	40164	0.0783775	146.746	3.49001	96.5098	0.000188333
14700	3019	1	21569.8	41687.3	1452.42	40234.8	0	146.867	3.48409	96.5159	0
14800	3024	1	21597.5	41742.8	1452.42	40290.1	0.24905	146.961	3.47945	96.52	0.00059663
14900	3033	1	21604	41755.9	1452.42	40303.2	0.304912	146.983	3.47836	96.5209	0.000730226
15000	3044	1	21612.8	41773.2	1452.42	40320.7	0	147.013	3.47692	96.5231	0
15100	3053	1	21658.9	41865.7	1452.42	40412.9	0.342533	147.17	3.46924	96.5299	0.000818171
15200	3060	1	21664.8	41877.6	1452.42	40424.9	0.342533	147.19	3.46825	96.5309	0.000817937
15300	3064	1	21665.8	41879.5	1452.42	40426.8	0.342533	147.193	3.46809	96.5311	0.000817899
15400	3068	1	21669.7	41887.3	1452.42	40434.5	0.342533	147.206	3.46745	96.5317	0.000817748
15500	3072	1	21673	41895.6	1452.42	40441.2	2.04006	147.218	3.46676	96.5284	0.00486937
15600	3082	1	21686.6	41922.8	1452.42	40468.3	2.09097	147.264	3.46451	96.5305	0.00498766
15700	3093	1	21695.1	41941.3	1452.42	40485.4	3.54015	147.293	3.46298	96.5286	0.00844071
15800	3108	1	21714.7	41978.1	1452.42	40524.6	1.14946	147.359	3.45994	96.5373	0.00273825
15900	3117	1	21715.4	41978.9	1452.42	40525.9	0.609246	147.361	3.45988	96.5387	0.00145131
16000	3123	1	21725.1	42000.7	1452.42	40545.3	2.98299	147.394	3.45808	96.5348	0.00710223
16100	3129	1	21731.9	42016.6	1452.42	40559	5.17928	147.417	3.45678	96.5309	0.0123267
16200	3136	1	21742.5	42035.6	1452.42	40580.1	3.09515	147.453	3.45521	96.5374	0.00736317
16300	3142	1	21780.5	42121.1	1452.42	40656.1	12.5275	147.582	3.4482	96.5221	0.0297416
16400	3148	1	21795.9	42149.4	1452.42	40686.9	10.1421	147.634	3.44588	96.5301	0.0240622
16500	3155	1	21813.8	42184.4	1452.42	40722.9	9.10797	147.695	3.44303	96.5354	0.0215909
16600	3167	1	21857	42263.8	1452.42	40809.2	2.23825	147.841	3.43656	96.5581	0.00529591
16700	3171	1	21863.7	42277.1	1452.42	40822.5	2.23825	147.864	3.43547	96.5592	0.00529424
16800	3177	1	21899	42347.3	1452.42	40893.2	1.66048	147.983	3.42979	96.5663	0.0039211
16900	3186	1	21911	42370.8	1452.42	40917.2	1.13552	148.024	3.42788	96.5694	0.00267997
17000	3196	1	21965.8	42480.3	1452.42	41026.8	1.13552	148.209	3.41904	96.5783	0.00267306
17100	3207	1	21978.5	42505.3	1452.42	41052.2	0.619757	148.252	3.41704	96.5815	0.00145807
17200	3217	1	21993.7	42535.2	1452.42	41082.5	0.231445	148.303	3.41463	96.5848	0.000544126
17300	3228	1	22004	42555.5	1452.42	41103.1	0.0109	148.337	3.413	96.587	2.56136e-05
17400	3239	1	22021.3	42590.2	1452.42	41137.8	0	148.396	3.41022	96.5898	0
17500	3251	1	22035.9	42619.4	1452.42	41167	0	148.445	3.40789	96.5921	0
17600	3264	1	22045.4	42638.3	1452.42	41185.9	0	148.477	3.40638	96.5936	0
17700	3276	1	22064.7	42679.7	1452.42	41224.6	2.70418	148.542	3.40307	96.5906	0.00633597
17800	3290	1	22086.9	42721.4	1452.42	41268.9	0.0759067	148.617	3.39975	96.6001	0.000177678
17900	3304	1	22102.9	42753.9	1452.42	41301	0.529035	148.67	3.39716	96.6016	0.0012374
18000	3314	1	22114.2	42776.3	1452.42	41323.5	0.384275	148.708	3.39538	96.6037	0.000898336
18100	3324	1	22117.1	42781.9	1452.42	41329.4	0.107252	148.718	3.39494	96.6048	0.000250694
18200	3334	1	22121.4	42790.3	1452.42	41337.9	0.0107867	148.733	3.39427	96.6057	2.52083e-05
18300	3340	1	22149.1	42845.8	1452.42	41393.4	0	148.826	3.38988	96.6101	0
18400	3345	1	22150.5	42848.6	1452.42	41396.2	0	148.83	3.38966	96.6103	0
18500	3355	1	22163.7	42875	1452.42	41422.6	0	148.875	3.38757	96.6124	0
18600	3365	1	22222.3	42992.2	1452.42	41539.7	0	149.071	3.37834	96.6217	0
18700	3373	1	22241.7	43031	1452.42	41578.6	0	149.137	3.37529	96.6247	0
18800	3377	1	22245.7	43039	1452.42	41586.6	0	149.15	3.37466	96.6253	0
18900	3385	1	22308.2	43164	1452.42	41711.6	0	149.359	3.36489	96.6351	0
19000	3389	1	22315.4	43178.3	1452.42	41725.9	0	149.383	3.36377	96.6362	0
19100	3396	1	22320.8	43189.2	1452.42	41736.7	0	149.401	3.36293	96.6371	0
19200	3407	1	22363.7	43275	1452.42	41822.6	0	149.545	3.35625	96.6437	0
19300	3413	1	22377.4	43302.4	1452.42	41850	0	149.591	3.35413	96.6459	0
19400	3425	1	22385.3	43318.2	1452.42	41865.8	0	149.617	3.35291	96.6471	0
19500	3442	1	22394.1	43335.7	1452.42	41883.3	0	149.646	3.35156	96.6484	0
19600	3448	1	22405.9	43359.3	1452.42	41906.9	0	149.686	3.34973	96.6503	0
19700	3456	1	22407.7	43363	1452.42	41910.5	0	149.692	3.34945	96.6506	0
19800	3467	1	22413	43373.6	1452.42	41921.2	0	149.71	3.34862	96.6514	0
19900	3474	1	22418.8	43385.2	1452.42	41932.8	0	149.729	3.34773	96.6523	0
20000	3480	1	22421.1	43389.9	1452.42	41937.4	0	149.737	3.34737	96.6526	0
20100	3484	1	22421.7	43391	1452.42	41938.6	0	149.739	3.34728	96.6527	0
20200	3492	1	22423.3	43394.3	1452.42	41941.8	0	149.744	3.34703	96.653	0
20300	3496	1	22424.7	43396.9	1452.42	41944.5	0	149.749	3.34683	96.6532	0
20400	3502	1	22425.3	43398.1	1452.42	41945.7	0	149.751	3.34673	96.6533	0
20500	3508	1	22430.9	43409.4	1452.42	41957	0	149.769	3.34587	96.6541	0
20600	3517	1	22433.6	43414.8	1452.42	41962.4	0	149.779	3.34545	96.6546	0
20700	3522	1	22436	43419.6	1452.42	41967.2	0	149.787	3.34508	96.6549	0
20800	3528	1	22438.8	43425.2	1452.42	41972.8	0	149.796	3.34465	96.6554	0
20900	3537	1	22450.7	43449	1452.42	41996.6	0	149.836	3.34282	96.6572	0
21000	3544	1	22456	43459.6	1452.42	42007.2	0	149.853	3.342	96.658	0

## Sheet: AP_FS
DIST	NL	NC	IICnum	Sum_varIIC	Sum_varIICintra	Sum_varIICflux	Sum_varIICconnector	eciic	thetaiicintra	thetaiicflux	thetaiicconnector
100	11	41	1138.79	1463.21	856.471	564.648	42.093	33.746	58.5336	38.5896	2.87676
200	22	32	1220.2	1659.65	856.471	727.46	75.7193	34.9314	51.6055	43.8321	4.56237
300	37	22	1306.93	1868.39	856.471	900.914	111.009	36.1515	45.84	48.2186	5.94141
400	48	18	1478.42	2316.88	856.471	1243.89	216.519	38.4502	36.9665	53.6882	9.34528
500	66	16	1545.72	2449.62	856.471	1378.5	214.645	39.3157	34.9634	56.2742	8.7624
600	84	12	2014	4047.76	856.471	2315.06	876.233	44.8776	21.1591	57.1936	21.6473
700	92	12	2083.06	3982.56	856.471	2453.18	672.91	45.6406	21.5055	61.5981	16.8964
800	105	8	2117.76	3856.46	856.471	2522.58	477.409	46.0191	22.2088	65.4118	12.3795
900	126	6	2367.84	4118.88	856.471	3022.74	239.673	48.6605	20.7938	73.3874	5.81888
1000	136	6	2431.65	4258.44	856.471	3150.35	251.617	49.3117	20.1123	73.979	5.90866
1100	148	4	2650.83	4900.66	856.471	3588.72	455.473	51.4862	17.4766	73.2293	9.29411
1200	165	4	2692.56	4738.19	856.471	3672.18	209.54	51.8899	18.0759	77.5017	4.42236
1300	188	4	2784.73	4793.83	856.471	3856.53	80.8299	52.7706	17.8661	80.4478	1.68612
1400	204	4	2834.72	4866.88	856.471	3956.49	53.9181	53.2421	17.5979	81.2942	1.10786
1500	226	4	2873.02	4933.72	856.471	4033.1	44.1523	53.6005	17.3595	81.7456	0.894909
1600	245	4	2928.13	5032.73	856.471	4143.33	32.9338	54.1122	17.018	82.3276	0.654392
1700	262	4	2982.68	5114.43	856.471	4252.42	5.54695	54.6139	16.7462	83.1454	0.108457
1800	276	4	3010.57	5183.89	856.471	4308.19	19.2275	54.8686	16.5218	83.1073	0.370909
1900	294	4	3046.82	5246.4	856.471	4380.69	9.24109	55.198	16.3249	83.4989	0.176142
2000	301	4	3096.71	5347.26	856.471	4480.47	10.3193	55.6481	16.017	83.79	0.192983
2100	320	4	3133.92	5413.57	856.471	4554.89	2.20013	55.9814	15.8208	84.1385	0.040641
2200	335	4	3157.92	5464.56	856.471	4602.9	5.18951	56.1954	15.6732	84.2319	0.0949666
2300	345	4	3165.49	5478.03	856.471	4618.03	3.52579	56.2627	15.6346	84.301	0.0643623
2400	355	4	3207.97	5563.43	856.471	4703	3.95966	56.6389	15.3947	84.5342	0.071173
2500	369	3	3441.21	6276.39	856.471	5169.48	250.44	58.6618	13.6459	82.3639	3.9902
2600	377	3	3466.09	6287.61	856.471	5219.23	211.904	58.8735	13.6216	83.0083	3.37018
2700	388	3	3502.4	6168.18	856.471	5291.86	19.8484	59.1811	13.8853	85.7929	0.321787
2800	396	3	3516.13	6178.75	856.471	5319.31	2.96713	59.2969	13.8616	86.0904	0.0480215
2900	408	3	3521.97	6190.44	856.471	5331.01	2.96713	59.3462	13.8354	86.1167	0.0479308
3000	422	3	3531.01	6208.52	856.471	5349.08	2.96713	59.4223	13.7951	86.1571	0.0477913
3100	435	3	3549.51	6242.69	856.471	5386.08	0.142812	59.5778	13.7196	86.2781	0.00228766
3200	443	3	3555.93	6255.77	856.471	5398.92	0.380126	59.6316	13.6909	86.303	0.00607641
3300	449	3	3566.26	6276.34	856.471	5419.58	0.296196	59.7182	13.646	86.3493	0.00471924
3400	464	3	3595.42	6334.38	856.471	5477.91	0.0002357	59.9619	13.521	86.479	3.72097e-06
3500	472	3	3602.5	6348.54	856.471	5492.07	0.0002357	60.0209	13.4908	86.5092	3.71267e-06
3600	475	3	3608.87	6361.28	856.471	5504.81	0.0002357	60.0739	13.4638	86.5362	3.70523e-06
3700	480	3	3615.55	6374.86	856.471	5518.16	0.230984	60.1295	13.4351	86.5613	0.00362335
3800	486	3	3621.6	6386.73	856.471	5530.26	0.0002357	60.1798	13.4102	86.5898	3.69046e-06
3900	487	3	3625.5	6395.98	856.471	5538.07	1.44414	60.2122	13.3908	86.5867	0.0225789
4000	490	3	3630.32	6406.36	856.471	5547.69	2.19891	60.2521	13.3691	86.5966	0.0343238
4100	493	3	3636.52	6416.56	856.471	5560.09	0.0002357	60.3035	13.3478	86.6522	3.67331e-06
4200	497	3	3639.84	6423.2	856.471	5566.73	0.0002357	60.3311	13.334	86.666	3.66951e-06
4300	502	3	3642.52	6428.57	856.471	5572.1	0.0002357	60.3533	13.3229	86.6771	3.66644e-06
4400	506	3	3649.48	6442.49	856.471	5586.02	0.0002357	60.4109	13.2941	86.7059	3.65852e-06
4500	506	3	3649.48	6442.49	856.471	5586.02	0.0002357	60.4109	13.2941	86.7059	3.65852e-06
4600	509	2	4184	8224.53	856.471	6655.05	713.006	64.6838	10.4136	80.9171	8.66926
4700	514	2	4198.75	7836.84	856.471	6684.56	295.811	64.7978	10.9288	85.2966	3.77462
4800	516	2	4208.79	7861.37	856.471	6704.63	300.27	64.8752	10.8947	85.2858	3.81956
4900	518	2	4223.03	7889.85	856.471	6733.11	300.27	64.9848	10.8554	85.3389	3.80577
5000	523	2	4322.62	7790.81	856.471	6932.3	2.03566	65.7467	10.9933	88.9805	0.026129
5100	526	2	4330.79	7805.37	856.471	6948.65	0.255211	65.8088	10.9728	89.0239	0.00326968
5200	528	2	4341.81	7827.41	856.471	6970.68	0.255211	65.8924	10.9419	89.0548	0.00326047
5300	529	2	4344.71	7832.94	856.471	6976.47	0.0001946	65.9144	10.9342	89.0658	2.48438e-06
5400	532	2	4380.35	7907.5	856.471	7047.75	3.27558	66.1842	10.8311	89.1275	0.0414237
5500	535	2	4386.18	7920.74	856.471	7059.41	4.85753	66.2282	10.813	89.1257	0.0613267
5600	537	2	4389.8	7928.7	856.471	7066.66	5.56668	66.2556	10.8022	89.1276	0.0702092
5700	543	2	4431.17	8007.21	856.471	7149.4	1.3455	66.567	10.6962	89.287	0.0168036
5800	546	2	4436.53	8019.16	856.471	7160.11	2.58042	66.6073	10.6803	89.2875	0.0321782
5900	550	2	4446.55	8036.64	856.471	7180.16	0.0001946	66.6825	10.6571	89.3429	2.42141e-06
6000	552	2	4447.14	8037.81	856.471	7181.34	0.0001946	66.6869	10.6555	89.3445	2.42106e-06
6100	554	2	4447.62	8038.76	856.471	7182.29	0.0001946	66.6905	10.6543	89.3457	2.42077e-06
6200	557	1	6404.63	15689	856.471	11096.3	3736.22	80.0289	5.45905	70.7267	23.8143
6300	562	1	6429.24	13866	856.471	11145.5	1863.99	80.1826	6.17677	80.3804	13.4429
6400	564	1	6430.61	13868.7	856.471	11148.3	1863.99	80.1911	6.17555	80.3842	13.4402
6500	565	1	6430.7	13868.9	856.471	11148.5	1863.99	80.1916	6.17547	80.3845	13.4401
6600	571	1	6454.24	12068.9	856.471	11195.5	16.8614	80.3383	7.09652	92.7638	0.13971
6700	575	1	6466.36	12091.1	856.471	11219.8	14.8674	80.4137	7.08347	92.7936	0.122961
6800	580	1	6557.01	12355.6	856.471	11401.1	98.0714	80.9754	6.93184	92.2744	0.793739
6900	584	1	6557.58	12356.8	856.471	11402.2	98.0714	80.9789	6.9312	92.2751	0.793666
7000	587	1	6563.64	12371	856.471	11414.3	100.209	81.0163	6.92321	92.2668	0.810027
7100	592	1	6595.36	12468.4	856.471	11477.8	134.184	81.2119	6.86911	92.0547	1.07619
7200	601	1	6663.04	12585.9	856.471	11613.1	116.253	81.6275	6.80502	92.2713	0.923682
7300	602	1	6666.27	12587.4	856.471	11619.6	111.308	81.6473	6.8042	92.3115	0.884285
7400	606	1	6667.4	12539.4	856.471	11621.9	61.0773	81.6542	6.83023	92.6827	0.487083
7500	614	1	6758.36	12760.9	856.471	11803.8	100.647	82.2092	6.71169	92.4996	0.788713
7600	619	1	6770.05	12707.1	856.471	11827.2	23.502	82.2803	6.74008	93.075	0.184951
7700	626	1	6773.94	12703.8	856.471	11834.9	12.3803	82.304	6.74185	93.1607	0.0974535
7800	631	1	6778.84	12714.6	856.471	11844.7	13.3493	82.3337	6.73614	93.1589	0.104992
7900	639	1	6788.17	12727.1	856.471	11863.4	7.2432	82.3904	6.7295	93.2136	0.0569115
8000	643	1	6796.58	12750.5	856.471	11880.2	13.771	82.4414	6.71717	93.1748	0.108004
8100	649	1	6821.45	12799.9	856.471	11930	13.4648	82.5921	6.69123	93.2036	0.105194
8200	655	1	6895.84	13010.4	856.471	12078.7	75.227	83.0412	6.58296	92.8388	0.578205
8300	663	1	6905.2	12954.1	856.471	12097.4	0.212513	83.0975	6.61157	93.3868	0.00164051
8400	671	1	6993.32	13161.5	856.471	12273.7	31.3412	83.6261	6.50739	93.2545	0.238128
8500	681	1	6999.03	13173.4	856.471	12285.1	31.8012	83.6602	6.50152	93.2571	0.241405
8600	692	1	7034.55	13244.3	856.471	12356.2	31.6683	83.8722	6.46671	93.2942	0.239109
8700	703	1	7044.39	13265.7	856.471	12375.8	33.3807	83.9309	6.45628	93.2921	0.251632
8800	710	1	7158.57	13558.7	856.471	12604.2	98.0146	84.6083	6.31677	92.9603	0.722892
8900	716	1	7174.63	13522.8	856.471	12636.3	29.9805	84.7032	6.33354	93.4448	0.221703
9000	725	1	7182.09	13533.7	856.471	12651.2	26.0365	84.7472	6.32841	93.4792	0.192382
9100	732	1	7188.53	13547.1	856.471	12664.1	26.5248	84.7852	6.32216	93.482	0.195797
9200	749	1	7273.19	13755.5	856.471	12833.4	65.6445	85.283	6.22637	93.2964	0.477222
9300	759	1	7306.54	13819.6	856.471	12900.1	62.9614	85.4783	6.19752	93.3469	0.455596
9400	770	1	7311.36	13828.2	856.471	12909.8	61.9392	85.5065	6.19366	93.3584	0.44792
9500	779	1	7322.63	13854.4	856.471	12932.3	65.6077	85.5724	6.18194	93.3445	0.473552
9600	790	1	7324.58	13851.4	856.471	12936.2	58.7253	85.5838	6.18327	93.3928	0.423966
9700	809	1	7369.73	13908.1	856.471	13026.5	25.1291	85.8472	6.15806	93.6613	0.180679
9800	818	1	7373.33	13911	856.471	13033.7	20.786	85.8681	6.1568	93.6938	0.149422
9900	830	1	7377.68	13919.7	856.471	13042.4	20.786	85.8934	6.15295	93.6977	0.149329
10000	840	1	7387.54	13939.4	856.471	13062.1	20.786	85.9508	6.14425	93.7066	0.149117
10100	852	1	7430.89	14052.8	856.471	13148.8	47.4566	86.2026	6.09468	93.5676	0.337703
10200	860	1	7435.85	14051.8	856.471	13158.8	36.6196	86.2314	6.09508	93.6443	0.260603
10300	870	1	7463.08	14122	856.471	13213.2	52.2687	86.3891	6.06482	93.5651	0.370124
10400	878	1	7489.38	14158.8	856.471	13265.8	36.4581	86.5412	6.04906	93.6934	0.257495
10500	890	1	7525.25	14221.8	856.471	13337.5	27.7729	86.7482	6.02224	93.7825	0.195284
10600	899	1	7546.07	14235.7	856.471	13379.2	0	86.8681	6.01637	93.9836	0
10700	904	1	7551.05	14245.6	856.471	13389.2	0	86.8968	6.01217	93.9878	0
10800	913	1	7612.64	14405.6	856.471	13512.3	36.785	87.2504	5.94541	93.7992	0.255352
10900	921	1	7639.23	14422	856.471	13565.5	0	87.4027	5.93865	94.0613	0
11000	930	1	7655.89	14455.3	856.471	13598.8	0	87.498	5.92496	94.075	0
11100	937	1	7661.15	14465.8	856.471	13609.4	0	87.528	5.92065	94.0793	0
11200	947	1	7729.14	14604.8	856.471	13745.3	2.95804	87.9156	5.86432	94.1154	0.0202539
11300	956	1	7732.98	14609.5	856.471	13753	0	87.9374	5.86243	94.1376	0
11400	966	1	7749.14	14641.8	856.471	13785.3	0	88.0292	5.84949	94.1505	0
11500	975	1	7755.02	14653.6	856.471	13797.1	0	88.0626	5.8448	94.1552	0
11600	984	1	7758.06	14659.7	856.471	13803.2	0	88.0799	5.84237	94.1576	0
11700	999	1	7774.23	14692	856.471	13835.5	0	88.1716	5.82951	94.1705	0
11800	1008	1	7820.68	14784.9	856.471	13928.4	0	88.4346	5.79288	94.2071	0
11900	1012	1	7823.22	14790	856.471	13933.5	0	88.449	5.79089	94.2091	0
12000	1018	1	7828.43	14800.4	856.471	13943.9	0	88.4784	5.78682	94.2132	0
12100	1021	1	7855.05	14853.6	856.471	13997.2	0	88.6287	5.76607	94.2339	0
12200	1025	1	7859.8	14863.1	856.471	14006.7	0	88.6555	5.76239	94.2376	0
12300	1032	1	7876.21	14895.9	856.471	14039.5	0	88.748	5.74969	94.2503	0
12400	1038	1	7885.59	14914.7	856.471	14058.2	0	88.8008	5.74246	94.2575	0
12500	1047	1	7893.63	14930.8	856.471	14074.3	0	88.8461	5.73627	94.2637	0
12600	1057	1	7901.43	14946.4	856.471	14089.9	0	88.89	5.73029	94.2697	0
12700	1061	1	7940.11	15023.7	856.471	14167.3	0	89.1073	5.70078	94.2992	0
12800	1067	1	7948.47	15040.5	856.471	14184	0	89.1542	5.69444	94.3056	0
12900	1073	1	7952.63	15048.8	856.471	14192.3	0	89.1775	5.69129	94.3087	0
13000	1082	1	7968.16	15079.8	856.471	14223.4	0	89.2646	5.67957	94.3204	0
13100	1085	1	7977.49	15098.5	856.471	14242	0	89.3168	5.67256	94.3274	0
13200	1094	1	8002.09	15147.7	856.471	14291.2	0	89.4544	5.65413	94.3459	0
13300	1096	1	8003.68	15150.9	856.471	14294.4	0	89.4633	5.65294	94.3471	0
13400	1100	1	8026.13	15195.8	856.471	14339.3	0	89.5887	5.63624	94.3638	0
13500	1102	1	8055.51	15254.5	856.471	14398.1	0	89.7525	5.61453	94.3855	0
13600	1104	1	8072.66	15302.3	856.471	14432.4	13.4146	89.848	5.59702	94.3153	0.0876644
13700	1109	1	8085.61	15321.8	856.471	14458.3	7.01219	89.92	5.5899	94.3643	0.0457662
13800	1115	1	8128.54	15400.6	856.471	14544.1	0	90.1584	5.56128	94.4387	0
13900	1119	1	8139.18	15421.9	856.471	14565.4	0	90.2174	5.5536	94.4464	0
14000	1125	1	8154.32	15452.2	856.471	14595.7	0	90.3013	5.54272	94.4573	0
14100	1127	1	8170.71	15485	856.471	14628.5	0	90.392	5.53099	94.469	0
14200	1131	1	8183.59	15510.7	856.471	14654.2	0	90.4632	5.5218	94.4782	0
14300	1133	1	8186.35	15516.2	856.471	14659.8	0	90.4785	5.51984	94.4802	0
14400	1138	1	8222.6	15588.7	856.471	14732.3	0	90.6786	5.49417	94.5058	0
14500	1138	1	8222.6	15588.7	856.471	14732.3	0	90.6786	5.49417	94.5058	0
14600	1141	1	8223.34	15590.2	856.471	14733.7	0	90.6826	5.49365	94.5064	0
14700	1147	1	8247.64	15638.8	856.471	14782.3	0	90.8165	5.47658	94.5234	0
14800	1147	1	8247.64	15638.8	856.471	14782.3	0	90.8165	5.47658	94.5234	0
14900	1149	1	8249.92	15643.4	856.471	14786.9	0	90.8291	5.47498	94.525	0
15000	1152	1	8254.15	15651.8	856.471	14795.4	0	90.8524	5.47202	94.528	0
15100	1154	1	8255.42	15654.4	856.471	14797.9	0	90.8593	5.47113	94.5289	0
15200	1155	1	8255.44	15654.4	856.471	14797.9	0	90.8594	5.47112	94.5289	0
15300	1157	1	8258.15	15659.8	856.471	14803.4	0	90.8744	5.46922	94.5308	0
15400	1157	1	8258.15	15659.8	856.471	14803.4	0	90.8744	5.46922	94.5308	0
15500	1159	1	8258.61	15660.7	856.471	14804.3	0	90.8769	5.4689	94.5311	0
15600	1163	1	8259.87	15663.3	856.471	14806.8	0	90.8838	5.46802	94.532	0
15700	1166	1	8264.43	15672.4	856.471	14815.9	0	90.9089	5.46484	94.5352	0
15800	1170	1	8268.89	15681.3	856.471	14824.8	0	90.9334	5.46173	94.5383	0
15900	1172	1	8269.07	15681.7	856.471	14825.2	0	90.9344	5.46161	94.5384	0
16000	1174	1	8269.26	15682.1	856.471	14825.6	0	90.9355	5.46147	94.5385	0
16100	1177	1	8273.58	15690.7	856.471	14834.2	0	90.9592	5.45846	94.5415	0
16200	1180	1	8283.08	15709.7	856.471	14853.2	0	91.0114	5.45186	94.5481	0
16300	1181	1	8307.09	15757.7	856.471	14901.2	0	91.1432	5.43525	94.5647	0
16400	1183	1	8317.27	15778.1	856.471	14921.6	0	91.1991	5.42824	94.5718	0
16500	1187	1	8329.51	15802.5	856.471	14946.1	0	91.2662	5.41983	94.5802	0
16600	1190	1	8363.14	15869.8	856.471	15013.3	0	91.4502	5.39685	94.6031	0
16700	1194	1	8369.7	15882.9	856.471	15026.5	0	91.486	5.3924	94.6076	0
16800	1197	1	8401.36	15946.3	856.471	15089.8	0	91.659	5.37098	94.629	0
16900	1197	1	8401.36	15946.3	856.471	15089.8	0	91.659	5.37098	94.629	0
17000	1202	1	8449.02	16041.6	856.471	15185.1	0	91.9185	5.33907	94.6609	0
17100	1209	1	8455.15	16053.8	856.471	15197.4	0	91.9519	5.33499	94.665	0
17200	1215	1	8463.32	16070.2	856.471	15213.7	0	91.9963	5.32957	94.6704	0
17300	1222	1	8470.64	16084.8	856.471	15228.3	0	92.0361	5.32472	94.6753	0
17400	1226	1	8481.34	16106.2	856.471	15249.7	0	92.0942	5.31765	94.6824	0
17500	1230	1	8486.59	16116.7	856.471	15260.2	0	92.1227	5.31418	94.6858	0
17600	1235	1	8490.74	16125	856.471	15268.5	0	92.1452	5.31145	94.6886	0
17700	1240	1	8500.59	16144.7	856.471	15288.2	0	92.1987	5.30496	94.695	0
17800	1245	1	8509.42	16162.4	856.471	15305.9	0	92.2465	5.29917	94.7008	0
17900	1252	1	8517.35	16178.2	856.471	15321.8	0	92.2895	5.29397	94.706	0
18000	1257	1	8525.2	16193.9	856.471	15337.5	0	92.332	5.28884	94.7112	0
18100	1262	1	8525.58	16194.7	856.471	15338.2	0	92.3341	5.28859	94.7114	0
18200	1264	1	8525.69	16194.9	856.471	15338.4	0	92.3347	5.28852	94.7115	0
18300	1266	1	8525.89	16195.3	856.471	15338.8	0	92.3357	5.28839	94.7116	0
18400	1269	1	8542.94	16229.4	856.471	15372.9	0	92.428	5.27727	94.7227	0
18500	1275	1	8550.48	16244.5	856.471	15388	0	92.4688	5.27238	94.7276	0
18600	1282	1	8595.9	16335.3	856.471	15478.9	0	92.7141	5.24306	94.7569	0
18700	1287	1	8607.23	16358	856.471	15501.5	0	92.7752	5.2358	94.7642	0
18800	1289	1	8607.81	16359.1	856.471	15502.7	0	92.7783	5.23543	94.7646	0
18900	1293	1	8664.88	16473.3	856.471	15616.8	0	93.0853	5.19915	94.8009	0
19000	1293	1	8664.88	16473.3	856.471	15616.8	0	93.0853	5.19915	94.8009	0
19100	1294	1	8665.44	16474.4	856.471	15617.9	0	93.0884	5.1988	94.8012	0
19200	1295	1	8703.91	16551.3	856.471	15694.9	0	93.2947	5.17463	94.8254	0
19300	1298	1	8709.47	16562.5	856.471	15706	0	93.3245	5.17116	94.8289	0
19400	1301	1	8711.65	16566.8	856.471	15710.4	0	93.3362	5.16979	94.8302	0
19500	1304	1	8715.89	16575.3	856.471	15718.8	0	93.359	5.16715	94.8329	0
19600	1306	1	8720.02	16583.6	856.471	15727.1	0	93.3811	5.16457	94.8354	0
19700	1307	1	8721.02	16585.6	856.471	15729.1	0	93.3864	5.16396	94.8361	0
19800	1308	1	8721.08	16585.7	856.471	15729.2	0	93.3867	5.16392	94.8361	0
19900	1310	1	8726.54	16596.6	856.471	15740.1	0	93.416	5.16052	94.8395	0
20000	1311	1	8727.86	16599.2	856.471	15742.8	0	93.423	5.1597	94.8403	0
20100	1311	1	8727.86	16599.2	856.471	15742.8	0	93.423	5.1597	94.8403	0
20200	1313	1	8728.3	16600.1	856.471	15743.7	0	93.4254	5.15942	94.8406	0
20300	1313	1	8728.3	16600.1	856.471	15743.7	0	93.4254	5.15942	94.8406	0
20400	1314	1	8728.41	16600.3	856.471	15743.9	0	93.4259	5.15936	94.8407	0
20500	1314	1	8728.41	16600.3	856.471	15743.9	0	93.4259	5.15936	94.8407	0
20600	1314	1	8728.41	16600.3	856.471	15743.9	0	93.4259	5.15936	94.8407	0
20700	1314	1	8728.41	16600.3	856.471	15743.9	0	93.4259	5.15936	94.8407	0
20800	1314	1	8728.41	16600.3	856.471	15743.9	0	93.4259	5.15936	94.8407	0
20900	1314	1	8728.41	16600.3	856.471	15743.9	0	93.4259	5.15936	94.8407	0
21000	1314	1	8728.41	16600.3	856.471	15743.9	0	93.4259	5.15936	94.8407	0

## Sheet: EO_ALL
DIST	NL	NC	IICnum	Sum_dIIC	Sum_dIICintra	Sum_dIICflux	Sum_dIICconnector	Sum_varIIC	Sum_varIICintra	Sum_varIICflux	Sum_varIICconnector	eciic	thetaiicintra	thetaiicflux	thetaiicconnector	dECIICch	dECIICfs	da_ecch	da_ecfs	propda_ecch	propda_ecfs	propec_dach	propec_dafs	diff__fs_thetaintra	diff__ch_thetaintra	diff__fs_thetaconnector	diff__ch_thetaconnector	diff__fs_thetaflux	diff__ch_thetaflux
100	53	176	4581.14	112.198	89.8371	20.3259	2.03479	5139.93	4115.56	931.155	93.2454	67.6841	80.0704	18.1161	1.81414	0.0167191	0.209112	0.0398502	0.195997	3.38351	1.93728	0.295551	0.516187	0.316383	0.224323	0.305663	0.0323584	-0.621603	-0.256569
200	159	103	5608.28	138.538	73.3835	53.2329	11.9216	7769.6	4115.56	2985.45	668.62	74.8885	52.97	38.4248	8.60559	0.0179584	0.214114	0.038611	0.190995	3.15003	1.89202	0.317458	0.528534	0.829649	-0.324631	-2.67525	0.444782	1.84589	-0.120081
300	269	66	6574.86	155.01	62.5954	74.8092	17.6058	10191.7	4115.56	4918.6	1157.58	81.0855	40.3814	48.2608	11.358	0.0220152	0.226713	0.0345542	0.178396	2.56956	1.78688	0.389171	0.559634	-2.12319	-0.84748	-0.809674	0.670457	2.93309	0.177074
400	364	55	7684.9	164.551	53.5539	92.8923	18.1054	12645.6	4115.56	7138.68	1391.4	87.6635	32.5454	56.4519	11.003	0.018647	0.234981	0.0379223	0.170129	3.03369	1.72401	0.329632	0.580042	-3.27861	-0.100644	0.845742	0.00759263	2.43304	0.0930933
500	477	40	9415.72	185.621	43.7094	112.581	29.3305	17477.5	4115.56	10600.3	2761.69	97.0346	23.5477	60.6511	15.8014	0.0252355	0.227195	0.0313339	0.177914	2.24166	1.78309	0.446098	0.560825	-0.714736	-0.628257	-2.04903	0.526505	2.7639	0.101774
600	586	29	15078.2	267.027	27.2947	145.411	94.3215	40262.9	4115.56	21925.4	14222	122.793	10.2217	54.4554	35.3229	0.0200841	0.255152	0.0364852	0.149958	2.81662	1.58772	0.355035	0.629834	-3.26232	0.0731384	9.81593	-0.843183	-6.55356	0.770053
700	694	27	16223.4	198.194	25.3681	149.264	23.5621	32153.7	4115.56	24215.6	3822.57	127.371	12.7996	75.312	11.8884	0.0185829	0.257889	0.0379864	0.147221	3.04416	1.57087	0.328498	0.636591	-2.93498	-0.0429504	5.80128	0.0866031	-2.86624	-0.043633
800	811	24	19534.9	206.19	21.0678	157.864	27.2578	40278.9	4115.56	30838.6	5324.78	139.767	10.2177	76.5626	13.2198	0.0174827	0.28124	0.0390866	0.123869	3.23572	1.44044	0.30905	0.694233	-3.17115	0.0191803	5.21693	-0.146086	-2.04574	0.126917
900	921	19	21721.8	205.958	18.9466	162.107	24.9047	44737.9	4115.56	35212.6	5409.76	147.383	9.19927	78.7086	12.0921	0.0187429	0.276582	0.0378264	0.128528	3.01817	1.4647	0.331327	0.682734	-2.38546	-0.00872123	3.22028	-0.149001	-0.83478	0.157732
1000	1043	16	24604.7	225.753	16.7267	166.547	42.4801	55546	4115.56	40978.4	10452.1	156.859	7.40928	73.7737	18.817	0.0183944	0.303396	0.038175	0.101713	3.07536	1.33525	0.325165	0.748925	-3.87323	0.004166	12.5998	-0.19453	-8.72654	0.190375
1100	1156	14	26317.6	205.853	15.638	168.724	21.4914	54175.7	4115.56	44404.2	5656.03	162.227	7.59668	81.9632	10.4402	0.0186045	0.311034	0.0379649	0.0940759	3.04063	1.30246	0.328879	0.767777	-3.2766	0.204013	5.50867	-2.60456	-2.23204	2.40055
1200	1260	13	31442.5	222	13.0892	173.822	35.0893	69802.4	4115.56	54653.9	11032.9	177.32	5.89601	78.298	15.806	0.0226325	0.36532	0.0339368	0.0397894	2.49947	1.10892	0.400084	0.901781	-4.90679	-0.0808791	11.7185	0.215792	-6.81171	-0.13491
1300	1368	12	32839.2	217.378	12.5324	174.935	29.9101	71385.1	4115.56	57447.3	9822.25	181.216	5.76529	80.4752	13.7595	0.0241847	0.374803	0.0323847	0.030307	2.33906	1.08086	0.427523	0.925188	-5.00712	-0.105432	10.8331	0.319386	-5.82592	-0.21395
1400	1479	12	34102.3	209.024	12.0683	175.863	21.0924	71281.9	4115.56	59973.4	7193	184.668	5.77363	84.1355	10.0909	0.0232802	0.37774	0.0332892	0.027369	2.42994	1.07245	0.411533	0.932441	-4.87562	-0.0724673	9.11705	0.00514266	-4.24141	0.0673313
1500	1610	11	35536.2	210.856	11.5813	176.837	22.4372	74930.1	4115.56	62841.2	7973.34	188.51	5.49253	83.8665	10.641	0.0242748	0.311293	0.0322946	0.0938165	2.33038	1.30138	0.429115	0.768417	-1.76508	-0.0925057	-1.20591	0.192633	2.971	-0.100122
1600	1736	7	46624.5	241.31	8.82703	182.346	50.1372	112510	4115.56	85017.9	23376.2	215.927	3.65796	75.565	20.7771	0.0268041	0.384355	0.0297652	0.0207548	2.11047	1.054	0.473828	0.948767	-3.97768	-0.0749486	18.3824	0.0403883	-14.4047	0.0345659
1700	1867	6	48839.2	237.366	8.42675	183.147	45.7926	115928	4115.56	89447.3	22364.8	220.996	3.55011	77.1579	19.292	0.0314706	0.392397	0.0250988	0.0127127	1.79753	1.0324	0.556319	0.968619	-4.00111	-0.112944	17.9322	0.124504	-13.9311	-0.011555
1800	1998	5	52324.8	217.888	7.8654	184.269	25.7537	114010	4115.56	96418.6	13475.6	228.746	3.60983	84.5705	11.8197	0.0365646	0.395546	0.0200047	0.00956359	1.54711	1.02418	0.646368	0.976393	-3.41708	-0.144565	9.569	-0.124832	-6.15193	0.269398
1900	2137	4	54167.9	216.864	7.59779	184.804	24.4615	117470	4115.56	100105	13250.3	232.74	3.50348	85.2168	11.2797	0.0417112	0.402513	0.0148582	0.00259623	1.35622	1.00645	0.737346	0.993591	-3.43879	-0.177763	9.04142	-0.202678	-5.60264	0.380438
2000	2289	4	55094.2	215.804	7.47003	185.06	23.2738	118895	4115.56	101957	12822.6	234.722	3.46149	85.7538	10.7847	0.0422355	0.403064	0.0143338	0.00204561	1.33938	1.00508	0.746615	0.99495	-3.43653	-0.197883	9.50761	0.241908	-6.0711	-0.0440267
2100	2417	3	56998.5	196.948	7.22047	185.559	4.16857	112257	4115.56	105766	2376.02	238.743	3.66618	94.2172	2.11658	0.0423645	0.41127	0.0142049	-0.00616016	1.3353	0.985022	0.748894	1.01521	-3.20461	-0.19647	1.11414	-0.0872006	2.09047	0.283675
2200	2567	3	59045.6	197.829	6.97013	186.06	4.79919	116809	4115.56	109860	2833.72	242.993	3.52331	94.0508	2.42593	0.0414779	0.343572	0.0150914	0.0615372	1.36384	1.17911	0.733223	0.848097	-0.840726	-0.179957	-15.339	-0.125603	16.1797	0.305561
2300	2694	3	60787.4	198.023	6.77041	186.459	4.79364	120373	4115.56	113344	2913.94	246.551	3.419	94.1603	2.42075	0.0402591	0.345337	0.0163103	0.0597724	1.40513	1.17308	0.711676	0.852454	-0.85878	-0.161928	-14.9347	-0.208542	15.7935	0.37047
2400	2832	3	62243.5	197.282	6.61203	186.776	3.89357	122795	4115.56	116256	2423.5	249.486	3.35157	94.6748	1.97362	0.037851	0.345166	0.0187184	0.0599433	1.49453	1.17367	0.669108	0.852032	-1.14686	-0.152213	-8.88065	0.120932	10.0275	0.0312809
2500	2962	3	63265.9	196.028	6.50518	186.99	2.53299	124019	4115.56	118301	1602.52	251.527	3.3185	95.3893	1.29216	0.0378697	0.342146	0.0186997	0.0629632	1.49379	1.18402	0.669438	0.844577	-1.11784	-0.143428	-8.40787	-0.0872496	9.52571	0.230677
2600	3091	3	65663.4	199.094	6.26766	187.465	5.36119	130732	4115.56	123096	3520.34	256.249	3.1481	94.1591	2.6928	0.0370361	0.346181	0.0195333	0.0589282	1.52741	1.17022	0.654702	0.854538	-1.159	-0.125937	-7.31968	-0.206833	8.47869	0.332768
2700	3208	3	66477.7	197.681	6.19088	187.618	3.8719	131414	4115.56	124724	2573.96	257.833	3.13175	94.9096	1.95866	0.0381106	0.346785	0.0184587	0.0583249	1.48434	1.16819	0.673698	0.856027	-1.54953	-0.145495	0.843515	0.173466	0.70602	-0.0279672
2800	3334	3	68346.9	198.282	6.02157	187.957	4.30376	135520	4115.56	128463	2941.49	261.432	3.03687	94.7926	2.17053	0.0370449	0.342594	0.0195244	0.062515	1.52705	1.18248	0.654858	0.845684	-1.35073	-0.130894	-1.13447	0.0861932	2.48521	0.0447055
2900	3460	3	69507.6	196.713	5.92102	188.158	2.63376	136730	4115.56	130784	1830.66	263.643	3.00998	95.6511	1.33889	0.0360752	0.342903	0.0204942	0.062206	1.5681	1.18141	0.637716	0.846446	-1.30262	-0.118587	-2.02671	-0.056967	3.32933	0.175556
3000	3599	3	70536.5	196.189	5.83465	188.331	2.02333	138385	4115.56	132842	1427.19	265.587	2.974	95.9947	1.03132	0.03645	0.342643	0.0201193	0.0624668	1.55197	1.18231	0.644342	0.845803	-1.37126	-0.12572	-0.014817	0.138699	1.38608	-0.0129729
3100	3722	3	71335.4	195.414	5.76931	188.461	1.1831	139399	4115.56	134440	843.976	267.087	2.95236	96.4422	0.605438	0.0366093	0.343392	0.0199601	0.0617173	1.54522	1.17973	0.647157	0.847653	-1.36299	-0.12278	-0.196553	0.0412696	1.55954	0.0815132
3200	3866	3	72831.6	195.687	5.65079	188.698	1.33781	142522	4115.56	137432	974.353	269.873	2.88767	96.4287	0.683651	0.0352156	0.343111	0.0213537	0.0619981	1.60637	1.18069	0.622521	0.84696	-1.32256	-0.10988	-0.328267	0.00182498	1.65084	0.108059
3300	4007	3	74079	196.651	5.55563	188.889	2.2068	145677	4115.56	139927	1634.78	272.175	2.82512	96.0527	1.12219	0.0384231	0.346683	0.0181463	0.0584266	1.47228	1.16853	0.679221	0.855776	-1.36985	-0.142636	0.378597	0.504424	0.991254	-0.361788
3400	4153	3	75309.2	196.929	5.46488	189.07	2.39348	148305	4115.56	142387	1802.52	274.425	2.77506	96.0095	1.21541	0.0380478	0.349093	0.0185215	0.0560169	1.4868	1.16046	0.672588	0.861724	-1.3967	-0.133403	0.860829	0.357256	0.535868	-0.223848
3500	4300	3	76231.1	196.442	5.39879	189.202	1.84124	149750	4115.56	144231	1403.6	276.1	2.74828	96.3144	0.937294	0.0386088	0.351112	0.0179605	0.0539979	1.46519	1.15379	0.682504	0.866708	-1.39893	-0.128815	0.612818	0.126679	0.786119	0.0021414
3600	4472	3	76910.7	195.874	5.35109	189.298	1.22552	150648	4115.56	145590	942.558	277.328	2.7319	96.6424	0.625668	0.0386243	0.350483	0.017945	0.0546265	1.4646	1.15586	0.682778	0.865156	-1.36669	-0.127676	0.24792	0.111977	1.11878	0.015703
3700	4626	3	77713	195.84	5.29585	189.408	1.13634	152193	4115.56	147195	883.088	278.77	2.70416	96.7156	0.58024	0.0377459	0.349236	0.0188234	0.0558736	1.49869	1.15999	0.66725	0.862078	-1.32083	-0.12063	-0.128336	0.0978984	1.44917	0.0227294
3800	4779	3	78513.7	195.852	5.24183	189.516	1.09432	153771	4115.56	148796	859.198	280.203	2.67642	96.7648	0.558752	0.0351303	0.351277	0.021439	0.0538324	1.61027	1.15325	0.621013	0.867116	-1.35148	-0.100838	0.333069	-0.00808919	1.01842	0.108931
3900	4922	3	79086.4	195.594	5.20387	189.592	0.797721	154688	4115.56	149942	630.893	281.223	2.66055	96.9316	0.407848	0.0351095	0.350745	0.0214598	0.0543642	1.61122	1.155	0.620646	0.865804	-1.33172	-0.100281	0.220026	-0.00149251	1.11169	0.101774
4000	5085	2	82746	202.135	4.97372	190.053	7.10896	167259	4115.56	157261	5882.38	287.656	2.46059	94.0225	3.51693	0.0490283	0.360657	0.00754106	0.0444529	1.15381	1.12326	0.866694	0.890269	-1.45459	-0.241043	2.88539	2.60532	-1.43079	-2.36428
4100	5256	2	83805	201.433	4.91087	190.178	6.34413	168811	4115.56	159379	5316.7	289.491	2.43797	94.4125	3.1495	0.0488822	0.362442	0.00768719	0.0426672	1.15726	1.11772	0.86411	0.894677	-1.45514	-0.237952	2.6917	2.61636	-1.23656	-2.37841
4200	5387	2	85060	202.414	4.83842	190.323	7.25234	172173	4115.56	161889	6168.84	291.65	2.39036	94.0267	3.58293	0.0500745	0.363492	0.00649482	0.0416173	1.1297	1.11449	0.885188	0.897269	-1.46173	-0.248516	3.26719	2.92509	-1.80546	-2.67657
4300	5521	2	85779.5	199.581	4.79784	190.404	4.37925	171200	4115.56	163328	3756.5	292.881	2.40395	95.4018	2.19422	0.050394	0.363489	0.00617536	0.0416208	1.12254	1.1145	0.890836	0.89726	-1.40706	-0.211044	1.68284	1.42363	-0.275787	-1.21259
4400	5657	2	86845.1	199.639	4.73896	190.522	4.37747	173376	4115.56	165459	3801.62	294.695	2.37377	95.4335	2.1927	0.0503962	0.364687	0.00617309	0.040423	1.12249	1.11084	0.890876	0.900217	-1.40415	-0.20662	1.70012	1.3571	-0.295965	-1.15048
4500	5790	2	87664.8	198.878	4.69465	190.611	3.57284	174346	4115.56	167098	3132.12	296.082	2.36057	95.8429	1.7965	0.0503416	0.364895	0.00622774	0.0402143	1.12371	1.11021	0.88991	0.900732	-1.39533	-0.20447	1.62474	1.33715	-0.229408	-1.13268
4600	5927	2	88557.5	199.143	4.64733	190.705	3.79028	176356	4115.56	168884	3356.58	297.586	2.33367	95.763	1.9033	0.0504833	0.366301	0.00608606	0.038808	1.12056	1.10595	0.892414	0.904204	-1.399	-0.204687	1.70221	1.40688	-0.303214	-1.20219
4700	6064	2	89153.4	199.004	4.61627	190.767	3.62033	177419	4115.56	170076	3227.65	298.586	2.31968	95.8611	1.81923	0.0504789	0.366899	0.00609044	0.038211	1.12065	1.10415	0.892337	0.905677	-1.39786	-0.203946	1.71227	1.4293	-0.31441	-1.22536
4800	6189	2	90208.9	196.45	4.56225	190.875	1.01275	177216	4115.56	172187	913.597	300.348	2.32234	97.1621	0.515528	0.0523413	0.368179	0.00422809	0.0369306	1.08078	1.10031	0.925258	0.908838	-1.36121	-0.182627	0.291014	0.187288	1.0702	-0.00466235
4900	6320	2	90830	196.564	4.53105	190.938	1.09499	178539	4115.56	173429	994.578	301.38	2.30513	97.1378	0.557065	0.0523243	0.36881	0.00424502	0.0362999	1.08113	1.09842	0.924959	0.910395	-1.36421	-0.181621	0.450088	0.205991	0.91413	-0.0243643
5000	6444	2	91565.7	196.562	4.49465	191.011	1.05668	179983	4115.56	174900	967.562	302.598	2.28663	97.1758	0.537584	0.0493168	0.369286	0.00725257	0.0358235	1.14706	1.09701	0.871793	0.911571	-1.35023	-0.14933	0.221586	-0.397147	1.12864	0.546472
5100	6581	2	92685.5	196.36	4.44035	191.119	0.80051	181997	4115.56	177140	741.959	304.443	2.26133	97.331	0.407676	0.0505082	0.372058	0.00606119	0.0330518	1.12	1.08884	0.892854	0.918413	-1.36795	-0.158645	0.229555	-0.199804	1.1384	0.358451
5200	6715	1	100237	209.676	4.10583	191.788	13.782	210173	4115.56	192243	13814.7	316.602	1.95818	91.4688	6.57301	0.0491757	0.395029	0.00739365	0.0100802	1.15035	1.02552	0.869299	0.975117	-1.66129	-0.128771	6.51639	-0.292223	-4.85511	0.420994
5300	6836	1	100992	196.942	4.07512	191.85	1.01662	198896	4115.56	193754	1026.71	317.793	2.0692	97.4146	0.516204	0.0491958	0.395936	0.0073735	0.00917388	1.14988	1.02317	0.869656	0.977355	-1.53002	-0.142224	0.366372	-0.0377405	1.16365	0.179966
5400	6980	1	101931	197.202	4.03758	191.925	1.23984	201011	4115.56	195631	1263.79	319.267	2.04743	97.3239	0.628717	0.049052	0.397437	0.00751737	0.00767297	1.15325	1.01931	0.867112	0.98106	-1.53494	-0.140199	0.452778	-0.0296265	1.08216	0.16983
5500	7094	1	102547	197.084	4.01335	191.973	1.09747	202103	4115.56	196862	1125.42	320.229	2.03636	97.4068	0.556855	0.0497854	0.398525	0.00678395	0.00658408	1.13626	1.01652	0.880077	0.983747	-1.53699	-0.146263	0.377746	0.12576	1.15924	0.0205075
5600	7236	1	103745	197.287	3.96701	192.066	1.25435	204675	4115.56	199258	1301.32	322.094	2.01078	97.3534	0.635796	0.0498174	0.400639	0.00675195	0.00447035	1.13553	1.01116	0.880643	0.988965	-1.54897	-0.143428	0.5485	0.0744275	1.00046	0.0689988
5700	7378	1	104687	197.217	3.93132	192.137	1.14814	206459	4115.56	201142	1201.95	323.553	1.9934	97.4244	0.582174	0.0496101	0.402186	0.00695922	0.00292327	1.14028	1.00727	0.876979	0.992784	-1.55349	-0.140073	0.533721	0.0214932	1.01977	0.118586
5800	7506	1	105189	197.201	3.91253	192.175	1.11322	207434	4115.56	202147	1170.98	324.329	1.98404	97.4515	0.56451	0.049568	0.400365	0.00700134	0.00474453	1.14125	1.01185	0.876234	0.988288	-1.50935	-0.139188	0.122789	0.0204985	1.38656	0.118685
5900	7613	1	105794	196.899	3.89016	192.22	0.789312	208308	4115.56	203357	835.044	325.26	1.97571	97.6234	0.400871	0.0495791	0.400997	0.00699026	0.00411294	1.14099	1.01026	0.87643	0.989847	-1.50816	-0.137461	0.0615328	-0.0348856	1.44663	0.172344
6000	7760	1	107356	197.687	3.83356	192.333	1.52024	212229	4115.56	206481	1632.07	327.652	1.93921	97.2918	0.769015	0.0497018	0.373873	0.00686755	0.0312367	1.13818	1.08355	0.878599	0.922893	-0.931943	-0.137132	-7.85424	0.0467867	8.78618	0.090341
6100	7877	1	108079	197.769	3.8079	192.384	1.5767	213747	4115.56	207928	1704.09	328.754	1.92543	97.2773	0.797246	0.0493977	0.374182	0.00717165	0.0309274	1.14518	1.08265	0.873224	0.923657	-1.19105	-0.134608	0.569246	0.0379275	0.621799	0.0966813
6200	7998	1	108923	197.43	3.77843	192.443	1.20818	215046	4115.56	209614	1315.98	330.034	1.91381	97.4742	0.611952	0.0492735	0.375045	0.00729586	0.0300649	1.14807	1.08016	0.871028	0.925786	-1.18817	-0.132829	0.434295	0.0185834	0.753872	0.114245
6300	8143	1	109585	197.256	3.7556	192.489	1.01152	216162	4115.56	210938	1108.47	331.036	1.90392	97.5833	0.512794	0.049034	0.374612	0.00753535	0.0304979	1.15368	1.08141	0.866795	0.924717	-1.17099	-0.130849	0.226566	0.00728887	0.944422	0.123557
6400	8273	1	110169	197.052	3.73567	192.529	0.787902	217091	4115.56	212107	868.024	331.917	1.89578	97.7044	0.399844	0.0496461	0.372856	0.00692329	0.0322535	1.13945	1.0865	0.877614	0.920383	-1.13573	-0.134621	-0.180418	0.0899328	1.31616	0.0446899
6500	8404	1	110819	196.991	3.71377	192.572	0.704489	218303	4115.56	213406	780.706	332.894	1.88525	97.7571	0.357626	0.0501781	0.37238	0.00639121	0.0327297	1.12737	1.08789	0.88702	0.919208	-1.13124	-0.137468	0.0418274	0.154174	1.08941	-0.0167006
6600	8551	1	111538	196.793	3.68983	192.62	0.483281	219499	4115.56	214844	539.04	333.973	1.87498	97.8794	0.245578	0.05024	0.373042	0.00632939	0.0320677	1.12598	1.08596	0.888113	0.920842	-1.13259	-0.133985	0.0818824	0.00620453	1.05071	0.127785
6700	8685	1	112139	196.878	3.67005	192.66	0.547575	220776	4115.56	216047	614.045	334.872	1.86413	97.8577	0.27813	0.0506848	0.372449	0.00588454	0.0326608	1.1161	1.08769	0.895976	0.919378	-1.11685	-0.136234	-0.0247875	0.0624862	1.14164	0.0737504
6800	8808	1	112828	196.912	3.64763	192.705	0.559793	222173	4115.56	217426	631.605	335.899	1.85241	97.8633	0.284286	0.0510231	0.373557	0.00554627	0.0315528	1.1087	1.08447	0.901956	0.922113	-1.12153	-0.135804	0.0123125	0.0121884	1.10923	0.123613
6900	8949	1	113441	196.611	3.62794	192.744	0.238644	223036	4115.56	218650	270.719	336.809	1.84524	98.0334	0.121379	0.0509407	0.372976	0.00562863	0.0321335	1.11049	1.08615	0.9005	0.920679	-1.11038	-0.133921	-0.0208271	-0.0378735	1.13122	0.1718
7000	9076	1	113958	196.725	3.61147	192.777	0.336136	224184	4115.56	219685	383.055	337.577	1.8358	97.9933	0.170866	0.0511389	0.373909	0.00543041	0.0312001	1.10619	1.08344	0.904004	0.922984	-1.11507	-0.135391	0.0293092	0.0294458	1.08576	0.105948
7100	9198	1	114434	196.643	3.59644	192.807	0.239294	225027	4115.56	220638	273.834	338.281	1.82892	98.0494	0.121689	0.0511962	0.373889	0.00537313	0.0312203	1.10495	1.0835	0.905017	0.922934	-1.10881	-0.134044	-0.0301714	-0.0249721	1.13898	0.159018
7200	9320	1	115070	196.826	3.57659	192.847	0.403085	226487	4115.56	221908	463.828	339.219	1.81713	97.9781	0.204792	0.0506704	0.374754	0.00589898	0.0303552	1.11642	1.081	0.895721	0.925069	-1.11466	-0.129945	0.135509	-0.0771025	0.979154	0.207047
7300	9446	1	115557	196.692	3.56148	192.877	0.2532	227292	4115.56	222884	292.592	339.937	1.81069	98.0606	0.128729	0.0498781	0.375796	0.00669127	0.0293137	1.13415	1.078	0.881716	0.92764	-1.11938	-0.127335	0.0934705	-0.0174854	1.02591	0.144816
7400	9560	1	116006	196.675	3.54772	192.905	0.22242	228154	4115.56	223780	258.02	340.596	1.80385	98.0831	0.11309	0.0500068	0.376306	0.00656258	0.0288032	1.13123	1.07654	0.88399	0.9289	-1.11916	-0.127864	0.06648	0.00765267	1.05268	0.120213
7500	9684	1	116841	196.826	3.52237	192.955	0.348166	229972	4115.56	225450	406.8	341.82	1.78959	98.0335	0.176891	0.0498932	0.377249	0.00667614	0.0278605	1.13381	1.07385	0.881983	0.931227	-1.11903	-0.126404	0.0633563	0.00952497	1.05567	0.116878
7600	9818	1	117510	196.89	3.50231	192.995	0.392385	231365	4115.56	226788	461.09	342.797	1.77882	98.0219	0.199291	0.0501083	0.378452	0.00646101	0.0266578	1.12894	1.07044	0.885786	0.934196	-1.12583	-0.127129	0.138962	0.0420256	0.98687	0.0851104
7700	9953	1	117976	196.842	3.48847	193.023	0.330856	232227	4115.56	227721	390.332	343.476	1.77221	98.0597	0.168082	0.0498676	0.379245	0.00670173	0.0258646	1.13439	1.0682	0.881531	0.936154	-1.128	-0.125074	0.0998958	0.0108012	1.0281	0.114267
7800	10087	1	118507	196.764	3.47282	193.054	0.236603	233180	4115.56	228784	280.393	344.249	1.76497	98.1148	0.120248	0.0498831	0.379304	0.00668626	0.0258053	1.13404	1.06803	0.881804	0.936301	-1.12151	-0.124551	0.0201372	0.00739929	1.10137	0.117144
7900	10227	1	119094	196.821	3.45573	193.089	0.276262	234401	4115.56	229956	329.011	345.099	1.75578	98.1039	0.140363	0.0498069	0.380368	0.00676243	0.0247414	1.13577	1.06505	0.880458	0.938927	-1.12527	-0.123945	0.00649094	0.0265984	1.11877	0.0973444
8000	10363	1	119689	196.954	3.43855	193.123	0.392384	235732	4115.56	231146	469.639	345.961	1.74587	98.0549	0.199226	0.0494763	0.380794	0.00709306	0.0243158	1.14336	1.06386	0.874613	0.939977	-1.12383	-0.120488	0.0422289	-0.0494018	1.08161	0.169887
8100	10538	1	120118	196.868	3.42627	193.147	0.294627	236474	4115.56	232005	353.9	346.58	1.74039	98.11	0.149657	0.0494535	0.381123	0.00711585	0.0239864	1.14389	1.06294	0.87421	0.94079	-1.12328	-0.120531	0.040698	-0.0214931	1.08258	0.142028
8200	10670	1	120804	196.969	3.40682	193.186	0.375633	237945	4115.56	233376	453.778	347.568	1.72962	98.0797	0.190707	0.0491144	0.382189	0.00745493	0.0229205	1.15179	1.05997	0.868216	0.943422	-1.12795	-0.118301	0.0996248	-0.0284321	1.02833	0.146736
8300	10808	1	121411	196.959	3.38978	193.22	0.348667	239130	4115.56	234591	423.32	348.441	1.72106	98.1019	0.177026	0.0492144	0.382446	0.0073549	0.0226638	1.14945	1.05926	0.869984	0.944055	-1.12304	-0.118855	0.0436767	0.012603	1.07936	0.106253
8400	10998	1	122093	196.862	3.37083	193.258	0.233006	240356	4115.56	235956	284.485	349.419	1.71228	98.1694	0.11836	0.0494075	0.383426	0.00716185	0.0216831	1.14495	1.05655	0.873397	0.946476	-1.12555	-0.119005	0.0138698	0.0132425	1.11168	0.105758
8500	11136	1	122691	196.96	3.35441	193.291	0.314273	241652	4115.56	237151	385.585	350.273	1.70309	98.1373	0.159562	0.0493428	0.384069	0.00722657	0.0210402	1.14646	1.05478	0.872253	0.948063	-1.12881	-0.117911	0.133636	0.00269025	0.995175	0.115222
8600	11287	1	123309	196.944	3.33759	193.325	0.281346	242850	4115.56	238388	346.926	351.154	1.69469	98.1625	0.142856	0.0495721	0.384188	0.00699721	0.0209216	1.14115	1.05446	0.876307	0.948356	-1.12292	-0.118668	0.0883208	0.0279561	1.0346	0.0907129
8700	11447	1	123979	196.973	3.31956	193.361	0.292105	244204	4115.56	239727	362.149	352.106	1.68529	98.1664	0.148297	0.0494927	0.384886	0.00707668	0.0202237	1.14298	1.05254	0.874903	0.950078	-1.12286	-0.117364	0.0810522	0.00982348	1.04181	0.107544
8800	11600	1	124424	196.945	3.30769	193.385	0.252306	245046	4115.56	240616	313.929	352.738	1.6795	98.1924	0.12811	0.0495511	0.385083	0.00701822	0.0200268	1.14164	1.05201	0.875936	0.950564	-1.11954	-0.117322	0.0386217	0.0177852	1.08092	0.0995364
8900	11725	1	124927	196.864	3.29438	193.411	0.158401	245936	4115.56	241622	197.885	353.45	1.67343	98.2461	0.080462	0.0495866	0.385039	0.0069827	0.0200706	1.14082	1.05213	0.876564	0.950456	-1.11371	-0.11675	-0.00610766	0.00242129	1.11981	0.114328
9000	11851	1	125369	196.894	3.28277	193.434	0.176663	246843	4115.56	242506	221.48	354.074	1.66728	98.243	0.089725	0.0496003	0.385782	0.00696901	0.0193273	1.1405	1.0501	0.876806	0.952291	-1.11701	-0.116389	0.015181	0.00374063	1.10183	0.112649
9100	11961	1	125651	196.897	3.27538	193.449	0.172611	247404	4115.56	243072	216.887	354.473	1.6635	98.2488	0.0876652	0.049549	0.385774	0.00702034	0.0193351	1.14168	1.05012	0.875899	0.952272	-1.11383	-0.115816	-0.00313064	-0.00239403	1.11696	0.1182
9200	12086	1	126066	196.908	3.26462	193.471	0.172423	248233	4115.56	243900	217.366	355.057	1.65794	98.2545	0.0875652	0.0495502	0.385921	0.00701915	0.019188	1.14166	1.04972	0.87592	0.952635	-1.11169	-0.115579	0.00849614	0.00620454	1.1032	0.109371
9300	12215	1	126512	196.958	3.25309	193.494	0.210636	249175	4115.56	244793	266.481	355.686	1.65167	98.2414	0.106945	0.0497341	0.386463	0.00683522	0.0186467	1.13744	1.04825	0.879171	0.953971	-1.1133	-0.115973	0.041729	0.014213	1.07157	0.101754
9400	12324	1	126891	196.935	3.24338	193.513	0.178346	249893	4115.56	245551	226.306	356.218	1.64693	98.2625	0.0905611	0.0496952	0.38698	0.00687417	0.0181293	1.13833	1.04685	0.878482	0.955248	-1.11491	-0.115386	0.0458401	0.00852571	1.06907	0.106864
9500	12454	1	127225	196.939	3.23487	193.53	0.173456	250555	4115.56	246219	220.679	356.686	1.64258	98.2693	0.0880761	0.0497626	0.386768	0.00680679	0.0183411	1.13679	1.04742	0.879673	0.954726	-1.11011	-0.115285	0.0520803	0.00597547	1.05803	0.109315
9600	12584	1	127596	196.971	3.22546	193.549	0.196165	251327	4115.56	246961	250.299	357.206	1.63753	98.2629	0.0995911	0.0499359	0.386113	0.00663346	0.0189961	1.13284	1.0492	0.882738	0.953109	-1.10061	-0.115903	0.052566	0.0246206	1.04804	0.0912846
9700	12721	1	127964	196.928	3.21618	193.568	0.143822	251997	4115.56	247697	184.04	357.721	1.63318	98.2938	0.0730328	0.0502183	0.386622	0.00635102	0.0184876	1.12647	1.04782	0.88773	0.954364	-1.10193	-0.116586	0.0409437	0.0211683	1.06099	0.0954238
9800	12850	1	128342	196.896	3.20671	193.587	0.102335	252700	4115.56	248453	131.338	358.248	1.62864	98.3194	0.0519741	0.0502328	0.385673	0.00633652	0.0194367	1.12614	1.0504	0.887987	0.952021	-1.09039	-0.116082	0.050535	0.00807749	1.03986	0.108007
9900	12972	1	128814	197.004	3.19495	193.61	0.199232	253770	4115.56	249398	256.639	358.907	1.62177	98.2771	0.101131	0.0504949	0.386165	0.00607448	0.0189443	1.1203	1.04906	0.892619	0.953237	-1.09064	-0.117151	0.0687062	0.0419787	1.02193	0.0751702
10000	13104	1	129250	196.968	3.18419	193.632	0.151721	254580	4115.56	250268	196.098	359.513	1.61661	98.3064	0.0770282	0.0505276	0.386174	0.00604179	0.0189353	1.11957	1.04903	0.893197	0.953259	-1.08634	-0.116527	0.0386984	0.0209108	1.04764	0.0956135
10100	13222	1	129570	196.96	3.17631	193.647	0.136474	255202	4115.56	250909	176.83	359.959	1.61267	98.318	0.0692903	0.0506068	0.386211	0.00596259	0.0188984	1.11782	1.04893	0.894597	0.95335	-1.08408	-0.11646	0.0436533	0.0167631	1.04044	0.099697
10200	13356	1	129937	196.969	3.16734	193.665	0.135871	255936	4115.56	251643	176.546	360.468	1.60804	98.323	0.0689807	0.0506266	0.386645	0.00594273	0.0184648	1.11738	1.04776	0.894948	0.95442	-1.08539	-0.116101	0.0654498	0.0113776	1.01994	0.104722
10300	13470	1	130130	196.934	3.16266	193.675	0.0965307	256270	4115.56	252028	125.615	360.735	1.60595	98.345	0.0490168	0.050556	0.386752	0.00601334	0.0183573	1.11894	1.04747	0.8937	0.954686	-1.08411	-0.115443	0.0363299	-0.00274404	1.04778	0.118186
10400	13602	1	130416	196.911	3.15571	193.689	0.0671082	256805	4115.56	252601	87.52	361.132	1.6026	98.3633	0.0340804	0.0506353	0.386835	0.005934	0.0182741	1.11719	1.04724	0.895102	0.954891	-1.08177	-0.115406	0.00768096	-0.00763666	1.07409	0.123041
10500	13714	1	130778	196.969	3.14698	193.706	0.115595	257592	4115.56	253325	151.173	361.632	1.59771	98.3436	0.0586871	0.0507491	0.387054	0.00582026	0.018055	1.11469	1.04665	0.897113	0.955432	-1.08093	-0.115819	0.0293424	0.0129795	1.05159	0.102841
10600	13837	1	131159	196.979	3.13783	193.724	0.117053	258357	4115.56	254088	153.527	362.159	1.59297	98.3476	0.0594243	0.0510495	0.387406	0.0055198	0.0177039	1.10813	1.0457	0.902424	0.956299	-1.08099	-0.116768	0.0366794	0.0245594	1.04431	0.0922087
10700	13956	1	131547	196.944	3.12857	193.743	0.0726385	259075	4115.56	254864	95.5542	362.695	1.58856	98.3746	0.0368829	0.0510929	0.387276	0.00547643	0.0178336	1.10719	1.04605	0.903191	0.955978	-1.07527	-0.116203	-0.0185127	0.00145663	1.09379	0.114753
10800	14070	1	131845	196.931	3.12152	193.757	0.0523415	259643	4115.56	255458	69.0096	363.104	1.58508	98.3883	0.0265787	0.0512375	0.38701	0.00533184	0.0180991	1.10406	1.04677	0.905747	0.955323	-1.07051	-0.116583	-0.0179927	0.00796224	1.0885	0.108622
10900	14182	1	132106	196.933	3.11535	193.769	0.0479572	260160	4115.56	255981	63.3539	363.464	1.58194	98.3937	0.0243519	0.0513099	0.387154	0.0052594	0.0179555	1.1025	1.04638	0.907027	0.955677	-1.07018	-0.116654	0.00370743	0.0104714	1.06647	0.106186
11000	14277	1	132343	196.94	3.10978	193.78	0.0502572	260636	4115.56	256454	66.5116	363.789	1.57904	98.3954	0.0255189	0.0513011	0.387393	0.00526825	0.0177161	1.10269	1.04573	0.906871	0.956268	-1.07034	-0.116235	0.00548238	0.00048764	1.06486	0.115745
11100	14389	1	132577	196.921	3.10428	193.791	0.0255312	261072	4115.56	256922	33.8484	364.111	1.57641	98.4106	0.0129652	0.0512761	0.387315	0.0052932	0.0177943	1.10323	1.04594	0.90643	0.956075	-1.06769	-0.115714	0.00103228	-0.0132898	1.06667	0.12901
11200	14494	1	132936	196.962	3.0959	193.808	0.0578307	261833	4115.56	257641	76.8777	364.604	1.57183	98.3988	0.0293613	0.0511356	0.387006	0.00543373	0.0181036	1.10626	1.04678	0.903946	0.955312	-1.06183	-0.115116	0.00286936	0.0016054	1.05897	0.113517
11300	14595	1	133184	196.96	3.09012	193.82	0.0496416	262319	4115.56	258137	66.1149	364.944	1.56891	98.4059	0.025204	0.051148	0.387244	0.00542132	0.017866	1.10599	1.04614	0.904165	0.955898	-1.06191	-0.114954	0.00320234	0.00220071	1.05872	0.112761
11400	14700	1	133534	196.943	3.08203	193.836	0.0251299	262986	4115.56	258837	33.5571	365.423	1.56493	98.4223	0.01276	0.0511246	0.387109	0.0054447	0.0180009	1.1065	1.0465	0.903752	0.955565	-1.05798	-0.114555	0.00392384	0.00113174	1.05406	0.113429
11500	14796	1	133824	196.985	3.07535	193.849	0.0603407	263613	4115.56	259417	80.7504	365.82	1.56121	98.4082	0.0306322	0.0512867	0.387071	0.0052826	0.0180388	1.103	1.0466	0.906617	0.955472	-1.05559	-0.115104	0.023558	0.01568	1.03203	0.0994211
11600	14884	1	134002	196.957	3.07126	193.857	0.0278656	263926	4115.56	259773	37.3404	366.063	1.55936	98.4265	0.0141481	0.0511351	0.387026	0.00543427	0.0180835	1.10627	1.04672	0.903936	0.955362	-1.0536	-0.114125	0.0119028	-0.00198529	1.0417	0.116106
11700	14973	1	134314	196.971	3.06414	193.872	0.034953	264559	4115.56	260396	46.9467	366.488	1.55563	98.4266	0.0177453	0.0510766	0.387185	0.00549275	0.0179243	1.10754	1.04629	0.902902	0.955755	-1.05241	-0.113672	0.0119361	-1.12882e-05	1.04047	0.113678
11800	15050	1	134479	196.974	3.06037	193.879	0.0346653	264889	4115.56	260727	46.6176	366.714	1.55369	98.4287	0.0175989	0.0509883	0.387349	0.00558106	0.017761	1.10946	1.04585	0.901341	0.956158	-1.05231	-0.113093	0.00492851	-0.00717419	1.04738	0.120269
11900	15152	1	134832	196.99	3.05237	193.895	0.0422988	265605	4115.56	261432	57.0322	367.194	1.5495	98.429	0.0214726	0.0509446	0.387338	0.00562479	0.0177719	1.11041	1.04588	0.900568	0.956131	-1.04955	-0.112629	0.0143654	-0.00706518	1.03519	0.119693
12000	15261	1	135207	197.014	3.04389	193.912	0.0578943	266377	4115.56	262184	78.2771	367.705	1.54501	98.4256	0.0293858	0.0508706	0.3872	0.00569874	0.0179099	1.11202	1.04625	0.899261	0.95579	-1.04488	-0.112027	0.000893848	-0.00752979	1.04399	0.119551
12100	15341	1	135417	197.012	3.03917	193.922	0.0510223	266788	4115.56	262604	69.0932	367.991	1.54263	98.4315	0.0258981	0.050857	0.387139	0.00571237	0.0179708	1.11232	1.04642	0.89902	0.95564	-1.04265	-0.111926	-0.00109336	-0.000156898	1.04375	0.112077
12200	15445	1	135740	197.022	3.03194	193.936	0.0539714	267438	4115.56	263249	73.2611	368.429	1.53888	98.4337	0.0273936	0.0508374	0.386805	0.00573193	0.018304	1.11275	1.04732	0.898674	0.954817	-1.03653	-0.111625	-0.0261976	0.00258691	1.06273	0.109038
12300	15554	1	136088	197.024	3.02419	193.952	0.0480453	268126	4115.56	263945	65.3841	368.901	1.53493	98.4407	0.0243856	0.0507748	0.387015	0.00579453	0.0180943	1.11412	1.04675	0.897568	0.955335	-1.0365	-0.111077	0.00854663	0.000380826	1.02796	0.110699
12400	15652	1	136280	197.019	3.01993	193.96	0.039096	268498	4115.56	264329	53.2798	369.161	1.53281	98.4474	0.0198437	0.0507438	0.387032	0.00582552	0.0180777	1.1148	1.04671	0.89702	0.955376	-1.03517	-0.110758	0.00827687	-0.00286423	1.0269	0.113622
12500	15757	1	136579	197.034	3.01333	193.973	0.0476365	269107	4115.56	264926	65.0616	369.565	1.52934	98.4465	0.0241769	0.0507164	0.387088	0.00585298	0.0180217	1.11541	1.04656	0.896535	0.955514	-1.03291	-0.110478	-0.00490549	0.00146037	1.03782	0.109017
12600	15846	1	136771	197.028	3.00908	193.982	0.0369663	269477	4115.56	265311	50.559	369.826	1.52724	98.454	0.0187619	0.050787	0.387132	0.00578239	0.0179778	1.11386	1.04644	0.897782	0.955622	-1.03182	-0.110544	-0.00520494	-0.000207662	1.03703	0.11075
12700	15932	1	137011	197.034	3.00381	193.992	0.0375534	269959	4115.56	265792	51.4526	370.151	1.52451	98.4564	0.0190594	0.0508304	0.387194	0.00573893	0.017916	1.1129	1.04627	0.898551	0.955775	-1.03056	-0.110535	-0.00123913	0.00216924	1.0318	0.10836
12800	16035	1	137238	197.036	2.99886	194.002	0.0352275	270408	4115.56	266244	48.3452	370.456	1.52198	98.4601	0.0178786	0.0508959	0.387286	0.00567343	0.0178232	1.11147	1.04602	0.899708	0.956004	-1.02955	-0.11051	-0.00323745	-0.00194897	1.03278	0.112454
12900	16132	1	137521	197.05	2.99267	194.015	0.0430772	270986	4115.56	266811	59.2403	370.838	1.51874	98.4594	0.021861	0.0509407	0.387695	0.00562865	0.0174143	1.11049	1.04492	0.9005	0.957013	-1.03092	-0.110566	0.00193826	0.0066018	1.02899	0.103967
13000	16229	1	137800	197.047	2.98661	194.027	0.0340433	271532	4115.56	267369	46.9115	371.214	1.51568	98.467	0.0172766	0.050941	0.387441	0.00562834	0.0176688	1.11049	1.0456	0.900505	0.956385	-1.02637	-0.11039	-0.00828212	0.00957311	1.03465	0.100815
13100	16335	1	138017	197.045	2.98193	194.036	0.0272704	271955	4115.56	267802	37.6376	371.506	1.51332	98.4728	0.0138396	0.0509356	0.387258	0.00563379	0.0178517	1.11061	1.0461	0.900409	0.955934	-1.02372	-0.110203	0.0131198	0.00999618	1.0106	0.100203
13200	16440	1	138263	197.044	2.97661	194.047	0.0202255	272439	4115.56	268295	27.9644	371.838	1.51064	98.4791	0.0102645	0.0509601	0.38728	0.00560925	0.0178299	1.11007	1.04604	0.900843	0.955988	-1.02194	-0.109955	0.00921977	0.00169044	1.01272	0.108256
13300	16537	1	138431	197.042	2.97299	194.054	0.0150523	272768	4115.56	268632	20.8371	372.064	1.50881	98.4835	0.00763911	0.0509802	0.387302	0.00558911	0.0178076	1.10963	1.04598	0.901199	0.956042	-1.02079	-0.109904	0.00631467	0.00257532	1.01447	0.107325
13400	16648	1	138597	197.044	2.96944	194.061	0.0133479	273097	4115.56	268963	18.4997	372.286	1.507	98.4862	0.00677406	0.0509566	0.387219	0.00561274	0.0178902	1.11015	1.0462	0.900781	0.955839	-1.01884	-0.109647	0.00677406	4.60491e-05	1.01207	0.109599
13500	16754	1	138881	197.051	2.96338	194.073	0.0142264	273665	4115.56	269530	19.7577	372.667	1.50387	98.4889	0.00721965	0.0512434	0.387417	0.00532595	0.0176922	1.10393	1.04567	0.905851	0.956327	-1.01827	-0.110403	0.00368561	-0.000154609	1.01459	0.110556
13600	16853	1	139075	197.047	2.95924	194.082	0.0066476	274043	4115.56	269919	9.24518	372.927	1.50179	98.4948	0.00337362	0.0512465	0.387504	0.00532286	0.0176055	1.10387	1.04543	0.905906	0.956541	-1.01755	-0.11025	0.00337362	-0.000747562	1.01418	0.110996
13700	16941	1	139217	197.052	2.95621	194.088	0.008444	274331	4115.56	270203	11.7554	373.118	1.50022	98.4955	0.00428511	0.0512403	0.387433	0.00532903	0.0176764	1.104	1.04562	0.905797	0.956366	-1.01588	-0.110128	0.00428511	0.000314707	1.01161	0.109815
13800	17029	1	139380	197.054	2.95276	194.094	0.006628	274654	4115.56	270529	9.23806	373.336	1.49845	98.4982	0.00336353	0.0511818	0.387605	0.00538759	0.017504	1.10526	1.04516	0.904761	0.956792	-1.01598	-0.10974	-0.000728073	-0.00311492	1.01672	0.112856
13900	17120	1	139603	197.081	2.94805	194.104	0.0295015	275131	4115.56	270975	41.185	373.635	1.49585	98.4892	0.0149692	0.0512312	0.387866	0.00533817	0.017243	1.1042	1.04446	0.905635	0.957436	-1.01667	-0.10975	0.0109522	-0.000999741	1.00572	0.110745
14000	17216	1	139827	197.071	2.94331	194.113	0.0145252	275560	4115.56	271424	20.3102	373.935	1.49353	98.4991	0.00737053	0.0512196	0.387714	0.00534971	0.0173955	1.10445	1.04487	0.905431	0.95706	-1.01368	-0.109487	0.00737053	-0.00411674	1.0063	0.113599
14100	17307	1	140025	197.075	2.93915	194.122	0.0144816	275955	4115.56	271820	20.278	374.2	1.49139	98.5013	0.0073483	0.0511617	0.388045	0.00540764	0.0170642	1.1057	1.04397	0.904407	0.957878	-1.01494	-0.109256	0.00614202	0.00379791	1.0088	0.10546
14200	17400	1	140326	197.078	2.93286	194.134	0.0105376	276551	4115.56	272421	14.7868	374.601	1.48817	98.5065	0.00534685	0.0511121	0.388121	0.00545726	0.0169881	1.10677	1.04377	0.90353	0.958065	-1.01331	-0.108814	0.00534685	0.00171075	1.00797	0.107105
14300	17491	1	140493	197.077	2.92937	194.141	0.0067297	276879	4115.56	272754	9.45476	374.824	1.48641	98.5102	0.00341476	0.0510839	0.388198	0.00548547	0.0169115	1.10738	1.04356	0.903031	0.958254	-1.01267	-0.108592	0.00341476	0.00208792	1.00926	0.106506
14400	17589	1	140685	197.095	2.92537	194.149	0.020102	277283	4115.56	273139	28.2806	375.08	1.48425	98.5056	0.0101992	0.0511158	0.388349	0.00545358	0.0167604	1.10669	1.04316	0.903595	0.958628	-1.0126	-0.108591	0.0101992	0.00522292	1.0024	0.103369
14500	17687	1	140951	197.099	2.91985	194.16	0.018473	277812	4115.56	273671	26.0378	375.434	1.48142	98.5092	0.00937243	0.0510827	0.388755	0.00548668	0.0163545	1.10741	1.04207	0.90301	0.959629	-1.01398	-0.108307	0.00876755	0.00768454	1.00522	0.100629
14600	17783	1	141099	197.11	2.91679	194.166	0.0265403	278119	4115.56	273966	37.448	375.631	1.47978	98.5068	0.0134647	0.0511389	0.388956	0.00543046	0.0161534	1.10619	1.04153	0.904003	0.960126	-1.01462	-0.108442	0.0129753	0.0117819	1.00164	0.0966572
14700	17869	1	141261	197.092	2.91344	194.173	0.005185	278414	4115.56	274291	7.32447	375.847	1.47821	98.5192	0.00263078	0.0512178	0.389258	0.00535155	0.0158516	1.10449	1.04072	0.905398	0.960871	-1.01577	-0.108416	0.00214141	0.000630747	1.01363	0.10778
14800	17974	1	141584	197.116	2.90679	194.186	0.0227721	279085	4115.56	274937	32.2418	376.277	1.47466	98.5138	0.0115527	0.0513858	0.389589	0.00518355	0.0155201	1.10088	1.03984	0.908368	0.961689	-1.01625	-0.108879	0.010529	0.0105671	1.00572	0.0983085
14900	18061	1	141725	197.101	2.90389	194.192	0.0053312	279343	4115.56	275220	7.55564	376.464	1.4733	98.524	0.00270479	0.0513651	0.38974	0.00520421	0.01537	1.10132	1.03944	0.908003	0.96206	-1.01614	-0.10856	-0.00565706	0.00129175	1.0218	0.107267
15000	18158	1	141894	197.104	2.90044	194.199	0.0040276	279679	4115.56	275558	5.71496	376.689	1.47153	98.5264	0.0020434	0.0514073	0.38992	0.005162	0.0151898	1.10041	1.03896	0.908749	0.962505	-1.01637	-0.108567	-0.00659247	0.00108437	1.02296	0.107483
15100	18259	1	142071	197.108	2.89683	194.206	0.0044324	280032	4115.56	275911	6.29714	376.923	1.46967	98.5281	0.00224872	0.0514246	0.390176	0.00514477	0.0149339	1.10005	1.03827	0.909054	0.963136	-1.0174	-0.108487	0.00163902	0.00116787	1.01576	0.107319
15200	18360	1	142307	197.121	2.89202	194.216	0.0127772	280517	4115.56	276384	18.1829	377.237	1.46713	98.5264	0.00648192	0.0515786	0.390538	0.0049907	0.0145719	1.09676	1.03731	0.911777	0.96403	-1.01874	-0.10888	0.00648192	0.00522387	1.01226	0.103658
15300	18459	1	142475	197.122	2.88862	194.223	0.0101793	280849	4115.56	276719	14.503	377.459	1.4654	98.5294	0.00516397	0.0516851	0.390746	0.00488424	0.0143633	1.0945	1.03676	0.913659	0.964545	-1.0192	-0.109106	0.00419847	0.00500341	1.015	0.104101
15400	18541	1	142668	197.123	2.88472	194.231	0.0078446	281231	4115.56	277104	11.1917	377.714	1.46341	98.5326	0.00397954	0.0515717	0.391125	0.00499769	0.0139842	1.09691	1.03575	0.911654	0.96548	-1.02092	-0.108551	0.00327062	0.00359901	1.01765	0.104955
15500	18647	1	142804	197.123	2.88197	194.236	0.0048028	281499	4115.56	277377	6.85854	377.894	1.46202	98.5355	0.00243644	0.0516596	0.391333	0.00490977	0.013776	1.09504	1.0352	0.913208	0.965994	-1.02162	-0.10872	0.00148946	0.00223886	1.02013	0.106482
15600	18723	1	142913	197.124	2.87977	194.24	0.0040929	281716	4115.56	277594	5.84932	378.038	1.46089	98.537	0.00207632	0.0516777	0.391502	0.00489167	0.0136076	1.09466	1.03476	0.913528	0.96641	-1.02222	-0.108682	0.00112954	0.00132273	1.02109	0.107359
15700	18805	1	143019	197.128	2.87763	194.245	0.0057557	281931	4115.56	277807	8.23172	378.179	1.45978	98.5373	0.00291977	0.0516598	0.391625	0.0049095	0.0134849	1.09504	1.03443	0.913213	0.966713	-1.02248	-0.10852	0.00261071	0.000169877	1.01987	0.10835
15800	18896	1	143205	197.138	2.8739	194.252	0.0122477	282311	4115.56	278178	17.5395	378.424	1.45781	98.536	0.00621282	0.0516558	0.39197	0.00491352	0.0131393	1.09512	1.03352	0.913142	0.967566	-1.02404	-0.108354	0.00590382	-3.94519e-05	1.01814	0.108395
15900	18980	1	143423	197.137	2.86952	194.261	0.0068889	282741	4115.56	278615	9.88021	378.712	1.4556	98.5409	0.00349444	0.051601	0.392227	0.0049683	0.0128829	1.09628	1.03285	0.912173	0.968199	-1.02448	-0.108056	0.00136766	0.00330542	1.02312	0.104754
16000	19072	1	143580	197.135	2.86639	194.267	0.0012831	283046	4115.56	278928	1.84226	378.919	1.45403	98.5453	0.00065087	0.0516268	0.392461	0.00494256	0.012648	1.09574	1.03223	0.912628	0.968779	-1.02524	-0.107919	-0.00147522	-0.00343244	1.02672	0.111353
16100	19154	1	143733	197.143	2.86334	194.273	0.0061976	283358	4115.56	279234	8.90803	379.121	1.45242	98.5444	0.00314373	0.0516274	0.392463	0.00494199	0.0126464	1.09572	1.03222	0.912638	0.968783	-1.0242	-0.107883	0.00304948	0.00193185	1.02116	0.105952
16200	19237	1	143892	197.149	2.86017	194.28	0.0093391	283682	4115.56	279553	13.4383	379.331	1.45077	98.5445	0.00473709	0.0516721	0.392508	0.00489724	0.0126015	1.09478	1.0321	0.913429	0.968894	-1.02342	-0.107931	0.00464293	0.00341859	1.01878	0.104513
16300	19305	1	144161	197.153	2.85483	194.29	0.0079097	284218	4115.56	280091	11.4027	379.686	1.44803	98.548	0.00401196	0.0518328	0.392809	0.00473655	0.0123009	1.09138	1.03132	0.91627	0.969636	-1.02393	-0.108237	0.00401196	0.00197071	1.01992	0.106264
16400	19389	1	144321	197.16	2.85167	194.297	0.0118095	284544	4115.56	280411	17.0436	379.896	1.44637	98.5476	0.00598981	0.0519312	0.393014	0.00463817	0.0120957	1.08931	1.03078	0.918009	0.970142	-1.02447	-0.108474	0.00517669	0.00417881	1.0193	0.104297
16500	19470	1	144529	197.161	2.84757	194.305	0.0085941	284954	4115.56	280826	12.4208	380.169	1.44429	98.5514	0.00435886	0.0519369	0.393266	0.00463249	0.0118437	1.08919	1.03012	0.91811	0.970764	-1.02504	-0.108322	0.00435886	0.00344352	1.02068	0.104883
16600	19546	1	144632	197.16	2.84553	194.309	0.0053381	285157	4115.56	281034	7.72073	380.306	1.44326	98.554	0.00270754	0.0519777	0.39334	0.00459167	0.0117695	1.08834	1.02992	0.918831	0.970947	-1.02487	-0.108355	0.00270754	0.00182319	1.02216	0.106534
16700	19629	1	144853	197.169	2.8412	194.318	0.0106285	285606	4115.56	281475	15.3956	380.596	1.44099	98.5536	0.00539052	0.0521459	0.393646	0.00442341	0.0114638	1.08483	1.02912	0.921806	0.971702	-1.02584	-0.10878	0.00539052	0.00440687	1.02045	0.104374
16800	19725	1	145017	197.163	2.83798	194.324	0.0012715	285920	4115.56	281803	1.84384	380.811	1.43941	98.5599	0.000644879	0.052278	0.393847	0.00429134	0.0112622	1.08209	1.0286	0.92414	0.9722	-1.02624	-0.109037	0.000644879	0.000507239	1.0256	0.108531
16900	19813	1	145131	197.166	2.83575	194.329	0.001717	286150	4115.56	282032	2.49204	380.961	1.43825	98.5609	0.000870886	0.0523012	0.394033	0.00426814	0.0110762	1.08161	1.02811	0.92455	0.972659	-1.02696	-0.109027	0.000870886	0.000661622	1.02609	0.108365
17000	19902	1	145248	197.17	2.83346	194.333	0.0030209	286386	4115.56	282266	4.38785	381.115	1.43707	98.5614	0.00153215	0.0523322	0.394188	0.0042371	0.010921	1.08097	1.02771	0.925099	0.973042	-1.0274	-0.109045	0.00153215	0.00106362	1.02587	0.10798
17100	19990	1	145485	197.174	2.82886	194.342	0.0032665	286859	4115.56	282738	4.75229	381.425	1.4347	98.5636	0.00165667	0.0525641	0.394591	0.00400524	0.0105188	1.0762	1.02666	0.929198	0.974035	-1.02902	-0.109631	0.00165667	0.00111497	1.02736	0.108514
17200	20067	1	145589	197.175	2.82683	194.346	0.0020365	287066	4115.56	282948	2.96479	381.562	1.43366	98.5653	0.00103279	0.0525543	0.39473	0.00401504	0.01038	1.0764	1.0263	0.929024	0.974377	-1.0294	-0.109511	0.00103279	0.00068083	1.02836	0.108823
17300	20159	1	145727	197.179	2.82416	194.352	0.0026756	287342	4115.56	283223	3.89923	381.742	1.43228	98.5664	0.001357	0.0527028	0.394955	0.00386653	0.0101549	1.07336	1.02571	0.93165	0.974933	-1.03027	-0.109903	0.001357	0.00116999	1.02891	0.108732
17400	20236	1	145882	197.181	2.82115	194.358	0.0025763	287653	4115.56	283534	3.75834	381.946	1.43074	98.568	0.00130655	0.0527071	0.395081	0.00386226	0.0100289	1.07328	1.02538	0.931725	0.975244	-1.03018	-0.109794	0.00130655	0.000996117	1.02887	0.108795
17500	20308	1	146021	197.185	2.81846	194.363	0.0035646	287933	4115.56	283812	5.20518	382.128	1.42935	98.5688	0.00180778	0.0527449	0.395308	0.00382446	0.0098011	1.07251	1.02479	0.932393	0.975806	-1.03106	-0.109817	0.00180778	0.00145604	1.02925	0.108354
17600	20393	1	146108	197.187	2.8168	194.366	0.003785	288105	4115.56	283984	5.53018	382.24	1.42849	98.5696	0.0019195	0.0527545	0.395439	0.00381488	0.0096708	1.07231	1.02446	0.932563	0.976128	-1.03152	-0.109785	0.0019195	0.00162769	1.0296	0.108149
17700	20467	1	146221	197.193	2.81462	194.371	0.0080904	288337	4115.56	284210	11.8299	382.388	1.42734	98.5686	0.00410279	0.0527569	0.395645	0.0038124	0.00946403	1.07226	1.02392	0.932607	0.976638	-1.03245	-0.109729	0.00410279	0.0033322	1.02834	0.106392
17800	20540	1	146319	197.198	2.81273	194.375	0.0103309	288538	4115.56	284407	15.116	382.517	1.42635	98.5684	0.00523883	0.0527859	0.395798	0.00378339	0.00931197	1.07167	1.02353	0.933119	0.977014	-1.03301	-0.109755	0.00523883	0.00382052	1.02777	0.105929
17900	20626	1	146427	197.191	2.81066	194.379	0.0014374	288740	4115.56	284623	2.10469	382.658	1.42535	98.5739	0.000728922	0.0528412	0.395939	0.0037281	0.00917095	1.07055	1.02316	0.934097	0.977362	-1.03333	-0.109805	0.000728922	0.00034781	1.0326	0.109453
18000	20694	1	146557	197.192	2.80817	194.384	0.0001601	288998	4115.56	284882	0.234633	382.827	1.42408	98.5758	8.11884e-05	0.0530031	0.396165	0.00356629	0.00894423	1.06728	1.02258	0.936957	0.977921	-1.03426	-0.110233	8.11884e-05	1.32932e-06	1.03418	0.110229
18100	20775	1	146721	197.195	2.80503	194.39	0.000277	289326	4115.56	285210	0.406397	383.041	1.42246	98.5774	0.000140463	0.0530499	0.396333	0.00351949	0.00877685	1.06634	1.02215	0.937784	0.978335	-1.03446	-0.110262	0.000140463	0.000140463	1.03432	0.110124
18200	20831	1	146804	197.197	2.80343	194.393	0.0007835	289494	4115.56	285378	1.15027	383.151	1.42164	98.578	0.000397337	0.0530661	0.396466	0.00350325	0.0086436	1.06602	1.0218	0.938072	0.978664	-1.03496	-0.110254	0.000397337	0.000397337	1.03456	0.10986
18300	20896	1	146904	197.199	2.80152	194.397	0.0009951	289694	4115.56	285577	1.46194	383.281	1.42066	98.5788	0.00050465	0.0530831	0.396502	0.00348628	0.00860707	1.06568	1.02171	0.938372	0.978754	-1.03453	-0.110234	0.00050465	0.00050465	1.03402	0.109722
18400	20952	1	147036	197.202	2.79901	194.402	0.0010931	289959	4115.56	285842	1.6072	383.453	1.41936	98.5801	0.000554285	0.0531209	0.396709	0.00344848	0.00840049	1.06492	1.02118	0.93904	0.979264	-1.03529	-0.110256	0.000554285	0.00052123	1.03473	0.10973
18500	21030	1	147159	197.205	2.79667	194.407	0.0015134	290205	4115.56	286088	2.22707	383.614	1.41815	98.5811	0.000767412	0.0531082	0.396915	0.00346111	0.00819411	1.06517	1.02064	0.938817	0.979773	-1.03611	-0.11012	0.000767412	0.000531093	1.03534	0.109583
18600	21095	1	147266	197.207	2.79464	194.411	0.001423	290419	4115.56	286302	2.09558	383.753	1.41711	98.5822	0.00072157	0.0531153	0.39701	0.00345402	0.00809916	1.06503	1.0204	0.938942	0.980007	-1.03612	-0.11006	0.00072157	0.000485422	1.0354	0.109577
18700	21186	1	147348	197.208	2.79309	194.414	0.0010828	290582	4115.56	286464	1.59559	383.859	1.41632	98.5831	0.000549102	0.0531657	0.39712	0.00340368	0.00798932	1.06402	1.02012	0.939832	0.980279	-1.03644	-0.11016	0.000549102	0.000313061	1.03589	0.109848
18800	21250	1	147430	197.21	2.79153	194.417	0.0014625	290747	4115.56	286629	2.15622	383.967	1.41551	98.5837	0.000741614	0.0531721	0.397171	0.00339725	0.00793873	1.06389	1.01999	0.939945	0.980403	-1.03626	-0.110119	0.000741614	0.00042156	1.03552	0.109699
18900	21336	1	147537	197.211	2.78952	194.421	0.0001629	290958	4115.56	286842	0.240385	384.105	1.41449	98.5854	8.26185e-05	0.0532254	0.397305	0.00334391	0.00780411	1.06283	1.01964	0.940888	0.980736	-1.0366	-0.110207	8.26185e-05	5.01282e-05	1.03651	0.110157
19000	21410	1	147703	197.214	2.78638	194.427	6.44e-05	291290	4115.56	287174	0.09513	384.321	1.41287	98.5871	3.26582e-05	0.0535308	0.397555	0.0030385	0.00755446	1.05676	1.019	0.946287	0.981352	-1.03747	-0.111077	3.26582e-05	3.26582e-05	1.03743	0.111044
19100	21489	1	147828	197.216	2.78403	194.432	0.0003093	291540	4115.56	287424	0.457312	384.483	1.41166	98.5882	0.000156861	0.0535418	0.397741	0.00302753	0.00736824	1.05655	1.01853	0.946481	0.981812	-1.03811	-0.111018	0.000156861	0.000156861	1.03796	0.110866
19200	21558	1	147929	197.218	2.78211	194.436	0.0003804	291744	4115.56	287628	0.562672	384.616	1.41068	98.5891	0.000192865	0.0535311	0.397908	0.00303823	0.00720114	1.05676	1.0181	0.946292	0.982224	-1.03876	-0.110905	0.000192865	0.000192865	1.03857	0.110713
19300	21647	1	148068	197.22	2.77951	194.441	0	292020	4115.56	287904	0	384.796	1.40934	98.5907	0	0.0534972	0.398073	0.00307216	0.00703684	1.05743	1.01768	0.945692	0.98263	-1.03912	-0.110685	0	0	1.03912	0.110682
19400	21707	1	148163	197.222	2.77772	194.445	0	292211	4115.56	288096	0	384.92	1.40842	98.5916	0	0.053488	0.398145	0.00308136	0.00696419	1.05761	1.01749	0.945529	0.982809	-1.03903	-0.110582	0	0	1.03902	0.110578
19500	21767	1	148204	197.223	2.77695	194.446	0	292293	4115.56	288177	0	384.973	1.40803	98.592	0	0.0534951	0.398215	0.00307425	0.00689486	1.05747	1.01731	0.945655	0.98298	-1.03931	-0.110573	0	0	1.03931	0.110569
19600	21836	1	148319	197.225	2.7748	194.45	0	292523	4115.56	288407	0	385.122	1.40692	98.5931	0	0.0534884	0.398336	0.00308093	0.00677319	1.0576	1.017	0.945537	0.983281	-1.03948	-0.110463	0	0	1.03948	0.110458
19700	21904	1	148391	197.227	2.77346	194.453	0	292666	4115.56	288551	0	385.215	1.40623	98.5938	0	0.0535156	0.398357	0.00305378	0.00675204	1.05706	1.01695	0.946017	0.983333	-1.03914	-0.110497	0	0	1.03914	0.110496
19800	21966	1	148448	197.228	2.77238	194.455	0	292781	4115.56	288666	0	385.29	1.40568	98.5943	0	0.0535512	0.398433	0.00301817	0.00667668	1.05636	1.01676	0.946647	0.983519	-1.03935	-0.110568	0	0	1.03935	0.110565
19900	22032	1	148516	197.229	2.77112	194.458	0	292916	4115.56	288801	0	385.378	1.40503	98.595	0	0.0536029	0.398496	0.00296641	0.00661335	1.05534	1.0166	0.947562	0.983675	-1.03938	-0.110685	0	0	1.03939	0.110681
20000	22092	1	148573	197.23	2.77006	194.46	0	293030	4115.56	288915	0	385.452	1.40448	98.5955	0	0.0536159	0.398548	0.00295341	0.00656182	1.05508	1.01646	0.947791	0.983802	-1.0394	-0.110684	0	0	1.0394	0.110676
20100	22164	1	148645	197.231	2.76872	194.463	0	293174	4115.56	289059	0	385.545	1.40379	98.5962	0	0.0536373	0.398593	0.00293203	0.00651642	1.05466	1.01635	0.948169	0.983914	-1.03926	-0.110698	0	0	1.03925	0.11069
20200	22230	1	148730	197.233	2.76714	194.466	0	293344	4115.56	289228	0	385.655	1.40298	98.597	0	0.0536408	0.398653	0.00292858	0.00645658	1.0546	1.0162	0.94823	0.984062	-1.03914	-0.110644	0	0	1.03913	0.110637
20300	22311	1	148845	197.235	2.76499	194.47	0	293575	4115.56	289460	0	385.805	1.40188	98.5981	0	0.0536254	0.398722	0.00294398	0.00638768	1.0549	1.01602	0.947958	0.984232	-1.03887	-0.110506	0	0	1.03887	0.110498
20400	22363	1	148895	197.236	2.76407	194.472	0	293675	4115.56	289559	0	385.869	1.4014	98.5986	0	0.0536318	0.398819	0.00293757	0.00629027	1.05477	1.01577	0.948071	0.984473	-1.03932	-0.110489	0	0	1.03932	0.110482
20500	22436	1	148964	197.237	2.76278	194.474	0	293813	4115.56	289697	0	385.959	1.40074	98.5993	0	0.0536357	0.398786	0.00293362	0.00632311	1.0547	1.01586	0.948141	0.984392	-1.03855	-0.110449	0	0	1.03854	0.11044
20600	22517	1	149063	197.239	2.76095	194.478	0	294011	4115.56	289896	0	386.087	1.3998	98.6002	0	0.053613	0.398913	0.0029563	0.00619683	1.05514	1.01553	0.94774	0.984703	-1.03888	-0.110299	0	0	1.03888	0.1103
20700	22595	1	149136	197.24	2.7596	194.481	0	294157	4115.56	290041	0	386.181	1.3991	98.6009	0	0.0536453	0.399047	0.00292408	0.00606217	1.05451	1.01519	0.94831	0.985036	-1.03947	-0.110348	0	0	1.03947	0.110349
20800	22655	1	149200	197.242	2.75841	194.483	0	294285	4115.56	290169	0	386.264	1.39849	98.6015	0	0.0537123	0.39906	0.00285701	0.00604926	1.05319	1.01516	0.949495	0.985068	-1.03912	-0.110517	0	0	1.03912	0.110518
20900	22730	1	149266	197.243	2.75719	194.486	0	294417	4115.56	290302	0	386.35	1.39787	98.6021	0	0.053768	0.399183	0.00280132	0.00592689	1.0521	1.01485	0.95048	0.98537	-1.03966	-0.110647	0	0	1.03965	0.110644
21000	22788	1	149318	197.244	2.75623	194.488	0	294521	4115.56	290406	0	386.417	1.39737	98.6026	0	0.053781	0.399202	0.00278839	0.0059072	1.05185	1.0148	0.950708	0.985418	-1.03944	-0.110649	0	0	1.03944	0.110646

## Sheet: EO_CH
DIST	NL	NC	IICnum	Sum_varIIC	Sum_varIICintra	Sum_varIICflux	Sum_varIICconnector	eciic	thetaiicintra	thetaiicflux	thetaiicconnector
100	44	160	4429.23	4974.85	3972.22	914.014	88.6409	66.5525	79.846	18.3727	1.78178
200	133	90	5408.66	7453.33	3972.22	2872.88	608.252	73.5436	53.2946	38.5449	8.16081
300	218	59	6288.55	9634.56	3972.22	4632.66	1029.7	79.3004	41.2289	48.0838	10.6876
400	301	47	7400.97	12167.6	3972.22	6857.49	1337.87	86.0289	32.646	56.3588	10.9954
500	394	34	8946.5	16430.5	3972.22	9948.55	2509.73	94.5859	24.1759	60.5494	15.2749
600	483	21	14478.6	39140.7	3972.22	21012.9	14155.7	120.327	10.1486	53.6854	36.1661
700	573	19	15626	30930.1	3972.22	23307.6	3650.32	125.004	12.8426	75.3557	11.8018
800	668	17	18857.8	38949.2	3972.22	29771.1	5205.89	137.324	10.1985	76.4357	13.3659
900	757	13	20915.2	43138.9	3972.22	33886	5280.69	144.621	9.20799	78.5509	12.2411
1000	856	10	23707.9	53641.6	3972.22	39471.3	10198.1	153.974	7.40511	73.5834	19.0116
1100	958	9	25347.5	53731.9	3972.22	42750.6	7009.18	159.209	7.39267	79.5627	13.0447
1200	1045	8	30035.4	66459.7	3972.22	52126.3	10361.2	173.307	5.97689	78.433	15.5902
1300	1134	8	31270	67661.6	3972.22	54595.6	9093.81	176.833	5.87072	80.6892	13.4401
1400	1237	8	32532.9	67946.6	3972.22	57121.4	6852.94	180.369	5.8461	84.0681	10.0858
1500	1348	8	33831.9	71122.6	3972.22	59719.3	7431.18	183.934	5.58503	83.9666	10.4484
1600	1458	6	44158.6	106411	3972.22	80372.7	22066.1	210.139	3.73291	75.5304	20.7367
1700	1571	6	45813.6	108440	3972.22	83682.7	20785.3	214.041	3.66305	77.1694	19.1675
1800	1682	5	48568.3	105802	3972.22	89192.2	12637.5	220.382	3.7544	84.3011	11.9445
1900	1800	5	49743.3	107904	3972.22	91542.1	12390	223.032	3.68125	84.8364	11.4824
2000	1934	5	50538.7	108549	3972.22	93132.9	11444.1	224.808	3.65938	85.7978	10.5428
2100	2038	4	52271.3	102837	3972.22	96598.2	2266.3	228.629	3.86265	93.9336	2.20379
2200	2159	4	54249	107263	3972.22	100554	2736.84	232.914	3.70327	93.7452	2.55154
2300	2265	3	55991.5	110927	3972.22	104038	2916.6	236.625	3.58093	93.7898	2.62929
2400	2385	3	57620.7	113370	3972.22	107297	2100.38	240.043	3.50378	94.6435	1.85268
2500	2494	3	58564.9	114740	3972.22	109185	1582.74	242.002	3.46193	95.1587	1.37941
2600	2601	3	60889.7	121325	3972.22	113835	3517.98	246.758	3.27403	93.8263	2.89963
2700	2703	3	61507.3	121206	3972.22	115070	2163.77	248.007	3.27725	94.9376	1.7852
2800	2813	3	63376.9	125395	3972.22	118809	2613.65	251.748	3.16776	94.7479	2.08433
2900	2912	3	64583	126966	3972.22	121222	1772.26	254.132	3.12857	95.4756	1.39585
3000	3024	3	65488.1	128148	3972.22	123032	1143.88	255.906	3.09972	96.0077	0.892623
3100	3133	3	66207.9	129172	3972.22	124471	728.75	257.309	3.07513	96.3607	0.564169
3200	3256	3	67792.3	132516	3972.22	127640	903.528	260.37	2.99755	96.3206	0.681826
3300	3350	3	68495.7	133846	3972.22	129047	826.861	261.717	2.96776	96.4145	0.61777
3400	3468	3	69687.5	136575	3972.22	131431	1172.02	263.984	2.90846	96.2334	0.858154
3500	3584	3	70458.4	138064	3972.22	132972	1119.17	265.44	2.8771	96.3123	0.810615
3600	3713	3	71084.2	138910	3972.22	134224	713.565	266.616	2.85957	96.6267	0.51369
3700	3834	3	71957	140620	3972.22	135970	678.269	268.248	2.82479	96.6929	0.482342
3800	3950	3	73094.2	143027	3972.22	138244	810.735	270.359	2.77726	96.6559	0.566841
3900	4048	3	73630.5	143878	3972.22	139317	588.951	271.349	2.76083	96.8298	0.409341
4000	4162	3	74831.1	147030	3972.22	141718	1340.34	273.553	2.70164	96.3868	0.91161
4100	4282	3	75812.1	148443	3972.22	143680	791.407	275.34	2.67592	96.7909	0.533137
4200	4377	3	76754.6	150527	3972.22	145565	990.222	277.046	2.63887	96.7033	0.657836
4300	4471	3	77351.8	151902	3972.22	146759	1170.54	278.122	2.61499	96.6144	0.770587
4400	4569	3	78312.3	153939	3972.22	148680	1286.3	279.843	2.58039	96.584	0.835594
4500	4675	3	79060.6	154860	3972.22	150177	711.349	281.177	2.56504	96.9756	0.459349
4600	4781	3	79841.8	156488	3972.22	151739	776.838	282.563	2.53835	96.9652	0.496419
4700	4890	3	80379.8	157401	3972.22	152815	613.749	283.513	2.52363	97.0864	0.389927
4800	4989	3	81012.7	158574	3972.22	154081	520.502	284.627	2.50497	97.1668	0.32824
4900	5092	3	81573.5	159736	3972.22	155203	560.79	285.611	2.48675	97.1622	0.351074
5000	5181	2	82757	163066	3972.22	157569	1524.23	287.675	2.43596	96.6293	0.934731
5100	5291	2	83559.2	164143	3972.22	159174	997.137	289.066	2.41997	96.9725	0.60748
5200	5395	1	90620.9	190337	3972.22	173297	13067	301.033	2.08695	91.0478	6.86523
5300	5491	1	91300	179623	3972.22	174656	995.011	302.159	2.21143	97.2346	0.553945
5400	5609	1	92176.7	181577	3972.22	176409	1195.4	303.606	2.18763	97.154	0.658343
5500	5698	1	92590.2	181993	3972.22	177236	784.561	304.286	2.18263	97.3863	0.431095
5600	5810	1	93665.5	184394	3972.22	179387	1035.13	306.048	2.15421	97.2844	0.561369
5700	5923	1	94557.1	186186	3972.22	181170	1043.91	307.501	2.13347	97.3058	0.560681
5800	6026	1	95019.6	187085	3972.22	182095	1017.76	308.252	2.12322	97.3328	0.544012
5900	6112	1	95563.8	187974	3972.22	183183	819.111	309.134	2.11317	97.4511	0.435756
6000	6233	1	96949.7	191309	3972.22	185955	1381.69	311.367	2.07634	97.2014	0.722228
6100	6332	1	97665.4	192823	3972.22	187386	1464.14	312.515	2.06004	97.1806	0.759319
6200	6429	1	98453	194085	3972.22	188962	1151.64	313.772	2.04664	97.36	0.593369
6300	6552	1	99101.3	195217	3972.22	190258	986.834	314.804	2.03477	97.4597	0.505506
6400	6663	1	99501.7	195638	3972.22	191059	606.303	315.439	2.0304	97.6597	0.309911
6500	6768	1	99976.4	196380	3972.22	192008	399.539	316.19	2.02272	97.7738	0.203452
6600	6901	1	100612	197725	3972.22	193280	473.301	317.194	2.00896	97.7517	0.239373
6700	7010	1	101060	198575	3972.22	194175	428.214	317.899	2.00036	97.784	0.215643
6800	7112	1	101608	199788	3972.22	195272	543.618	318.761	1.98822	97.7397	0.272097
6900	7232	1	102177	200702	3972.22	196410	319.623	319.652	1.97916	97.8616	0.159252
7000	7341	1	102601	201514	3972.22	197257	284.982	320.313	1.97119	97.8874	0.141421
7100	7443	1	103017	202359	3972.22	198090	296.782	320.963	1.96296	97.8904	0.146662
7200	7555	1	103704	204010	3972.22	199463	575.094	322.031	1.94707	97.771	0.281895
7300	7673	1	104317	204962	3972.22	200690	299.685	322.982	1.93803	97.9158	0.146215
7400	7773	1	104694	205632	3972.22	201443	216.813	323.564	1.93172	97.9628	0.105438
7500	7885	1	105472	207319	3972.22	203000	346.982	324.765	1.91599	97.9166	0.167366
7600	7995	1	106028	208412	3972.22	204112	327.761	325.62	1.90595	97.9368	0.157266
7700	8109	1	106503	209363	3972.22	205062	329.288	326.348	1.89729	97.9454	0.157281
7800	8222	1	106979	210224	3972.22	206014	237.234	327.077	1.88952	97.9976	0.112848
7900	8339	1	107526	211319	3972.22	207107	240.406	327.911	1.87972	98.0065	0.113764
8000	8459	1	108138	212833	3972.22	208332	529.163	328.844	1.86635	97.885	0.248628
8100	8602	1	108531	213455	3972.22	209118	365.329	329.441	1.86092	97.9679	0.17115
8200	8714	1	109229	214956	3972.22	210513	471.053	330.498	1.84792	97.9329	0.219139
8300	8830	1	109755	215892	3972.22	211565	354.975	331.292	1.83991	97.9957	0.164423
8400	8986	1	110327	216909	3972.22	212709	228.01	332.155	1.83128	98.0636	0.105118
8500	9108	1	110882	218134	3972.22	213820	342.191	332.989	1.821	98.0221	0.156872
8600	9237	1	111387	219053	3972.22	214829	251.692	333.747	1.81336	98.0717	0.1149
8700	9371	1	112011	220354	3972.22	216077	305.133	334.68	1.80266	98.0589	0.138474
8800	9506	1	112399	221069	3972.22	216853	243.894	335.259	1.79683	98.0928	0.110325
8900	9618	1	112844	221890	3972.22	217745	173.164	335.923	1.79018	98.1318	0.0780407
9000	9727	1	113240	222700	3972.22	218536	191.487	336.512	1.78367	98.1304	0.0859844
9100	9827	1	113508	223245	3972.22	219072	201.053	336.91	1.77931	98.1306	0.0900593
9200	9936	1	113882	223974	3972.22	219820	182.227	337.464	1.77352	98.1451	0.0813607
9300	10047	1	114241	224719	3972.22	220538	208.387	337.996	1.76764	98.1396	0.0927322
9400	10139	1	114593	225398	3972.22	221241	184.906	338.515	1.76231	98.1556	0.0820353
9500	10244	1	114878	225969	3972.22	221811	185.522	338.936	1.75786	98.16	0.0821007
9600	10353	1	115171	226540	3972.22	222398	169.838	339.369	1.75343	98.1716	0.0749705
9700	10457	1	115435	227015	3972.22	222925	117.74	339.757	1.74976	98.1984	0.0518645
9800	10565	1	115772	227671	3972.22	223599	99.94	340.253	1.74472	98.2114	0.0438966
9900	10662	1	116134	228431	3972.22	224323	135.121	340.784	1.73892	98.2019	0.059152
10000	10763	1	116518	229193	3972.22	225092	128.617	341.348	1.73314	98.2108	0.0561174
10100	10860	1	116788	229724	3972.22	225631	120.668	341.742	1.72913	98.2183	0.0525272
10200	10966	1	117114	230388	3972.22	226283	132.711	342.219	1.72415	98.2183	0.0576031
10300	11063	1	117305	230757	3972.22	226665	119.441	342.498	1.72139	98.2269	0.0517608
10400	11162	1	117543	231211	3972.22	227142	96.4544	342.846	1.71801	98.2403	0.0417171
10500	11255	1	117841	231816	3972.22	227738	105.958	343.28	1.71353	98.2408	0.0457076
10600	11349	1	118110	232329	3972.22	228276	81.0012	343.671	1.70974	98.2554	0.0348649
10700	11442	1	118448	233007	3972.22	228953	82.5457	344.163	1.70476	98.2598	0.0354262
10800	11530	1	118680	233431	3972.22	229416	43.4566	344.5	1.70167	98.2797	0.0186164
10900	11621	1	118897	233854	3972.22	229849	32.4601	344.814	1.69859	98.2875	0.0138805
11000	11698	1	119112	234311	3972.22	230280	58.6511	345.126	1.69528	98.2797	0.0250313
11100	11789	1	119329	234748	3972.22	230714	61.6329	345.441	1.69212	98.2816	0.0262549
11200	11877	1	119688	235469	3972.22	231431	65.3567	345.959	1.68694	98.2853	0.027756
11300	11956	1	119908	235899	3972.22	231873	54.2645	346.278	1.68387	98.2931	0.0230033
11400	12042	1	120229	236514	3972.22	232514	27.5025	346.741	1.67949	98.3089	0.0116283
11500	12121	1	120449	236962	3972.22	232954	35.4308	347.058	1.67632	98.3087	0.0149521
11600	12191	1	120648	237362	3972.22	233352	38.2945	347.344	1.67349	98.3104	0.0161334
11700	12258	1	120943	237957	3972.22	233942	42.253	347.769	1.6693	98.3129	0.0177566
11800	12326	1	121115	238317	3972.22	234286	59.0385	348.016	1.66678	98.3084	0.0247731
11900	12408	1	121444	238983	3972.22	234943	68.2005	348.488	1.66213	98.3093	0.0285378
12000	12499	1	121801	239718	3972.22	235658	88.4934	349	1.65704	98.3061	0.0369156
12100	12569	1	121994	240078	3972.22	236043	62.5523	349.276	1.65456	98.3194	0.026055
12200	12652	1	122290	240667	3972.22	236635	59.7016	349.699	1.65051	98.3247	0.0248067
12300	12749	1	122619	241324	3972.22	237294	57.9293	350.17	1.64601	98.33	0.0240048
12400	12827	1	122800	241683	3972.22	237656	54.8811	350.429	1.64357	98.3337	0.0227079
12500	12921	1	123076	242236	3972.22	238208	55.0274	350.822	1.63982	98.3375	0.0227165
12600	12997	1	123232	242537	3972.22	238519	46.0081	351.044	1.63778	98.3432	0.0189695
12700	13068	1	123437	242942	3972.22	238929	41.0334	351.336	1.63505	98.3481	0.0168902
12800	13160	1	123623	243323	3972.22	239302	48.2451	351.601	1.63249	98.3477	0.0198276
12900	13246	1	123867	243799	3972.22	239790	37.2019	351.948	1.6293	98.3554	0.0152592
13000	13326	1	124118	244283	3972.22	240292	18.8184	352.304	1.62607	98.3662	0.00770351
13100	13412	1	124315	244667	3972.22	240685	9.40363	352.583	1.62353	98.3726	0.00384345
13200	13498	1	124530	245110	3972.22	241116	21.0158	352.889	1.62059	98.3708	0.00857405
13300	13578	1	124677	245394	3972.22	241409	12.4262	353.096	1.61872	98.3762	0.0050638
13400	13676	1	124832	245708	3972.22	241719	16.5313	353.316	1.61664	98.3766	0.00672801
13500	13764	1	125012	246069	3972.22	242079	18.1458	353.57	1.61427	98.3784	0.00737426
13600	13843	1	125186	246410	3972.22	242427	10.155	353.816	1.61204	98.3838	0.00412118
13700	13917	1	125316	246669	3972.22	242687	9.79375	354	1.61035	98.3857	0.0039704
13800	13992	1	125478	246999	3972.22	243011	16.0017	354.228	1.60819	98.3853	0.00647845
13900	14068	1	125665	247398	3972.22	243386	39.5068	354.493	1.6056	98.3784	0.0159689
14000	14149	1	125870	247797	3972.22	243796	28.4651	354.782	1.60301	98.3855	0.0114873
14100	14232	1	126064	248165	3972.22	244184	8.81082	355.055	1.60064	98.3958	0.00355039
14200	14311	1	126348	248732	3972.22	244751	9.04416	355.454	1.59699	98.3994	0.0036361
14300	14391	1	126506	249042	3972.22	245067	3.3044	355.676	1.595	98.4037	0.00132684
14400	14476	1	126670	249381	3972.22	245396	12.4098	355.908	1.59284	98.4022	0.00497625
14500	14566	1	126918	249869	3972.22	245892	4.21752	356.256	1.58972	98.4086	0.00168789
14600	14649	1	127036	250105	3972.22	246128	4.20883	356.422	1.58822	98.4101	0.00168282
14700	14722	1	127162	250356	3972.22	246379	5.0072	356.597	1.58663	98.4114	0.00200003
14800	14813	1	127407	250845	3972.22	246870	2.47231	356.941	1.58354	98.4155	0.000985593
14900	14887	1	127540	251111	3972.22	247135	3.54831	357.127	1.58186	98.4167	0.00141304
15000	14965	1	127681	251391	3972.22	247417	2.41093	357.324	1.5801	98.4189	0.000959034
15100	15041	1	127835	251700	3972.22	247725	2.7205	357.54	1.57816	98.4208	0.00108085
15200	15122	1	128006	252043	3972.22	248067	3.17082	357.779	1.57601	98.4227	0.00125805
15300	15202	1	128128	252284	3972.22	248311	0.405074	357.95	1.57451	98.4253	0.000160563
15400	15272	1	128332	252692	3972.22	248719	0.961577	358.234	1.57196	98.4277	0.000380533
15500	15357	1	128431	252889	3972.22	248917	0.499662	358.372	1.57074	98.4291	0.000197581
15600	15420	1	128524	253077	3972.22	249103	1.90717	358.502	1.56957	98.4297	0.000753592
15700	15485	1	128624	253283	3972.22	249304	6.96499	358.642	1.5683	98.429	0.00274989
15800	15563	1	128792	253628	3972.22	249640	15.8575	358.876	1.56616	98.4276	0.00625227
15900	15631	1	129003	254035	3972.22	250062	0.480197	359.171	1.56365	98.4362	0.000189028
16000	15700	1	129137	254313	3972.22	250330	10.3844	359.357	1.56194	98.434	0.00408331
16100	15769	1	129275	254580	3972.22	250605	3.08521	359.548	1.5603	98.4385	0.00121188
16200	15831	1	129406	254843	3972.22	250867	3.3601	359.73	1.5587	98.44	0.0013185
16300	15881	1	129604	255241	3972.22	251263	5.2101	360.005	1.55627	98.4417	0.00204125
16400	15942	1	129721	255474	3972.22	251497	4.62664	360.168	1.55484	98.4433	0.001811
16500	16004	1	129906	255842	3972.22	251867	2.34181	360.425	1.55261	98.4465	0.000915334
16600	16061	1	129988	256006	3972.22	252031	2.26397	360.538	1.55161	98.4475	0.000884342
16700	16126	1	130140	256310	3972.22	252335	2.5212	360.749	1.54977	98.4492	0.00098365
16800	16205	1	130251	256530	3972.22	252557	0.353087	360.903	1.54844	98.4514	0.00013764
16900	16278	1	130347	256723	3972.22	252750	0.53723	361.036	1.54728	98.4525	0.000209264
17000	16352	1	130444	256917	3972.22	252943	1.20372	361.17	1.54611	98.4534	0.000468524
17100	16429	1	130592	257214	3972.22	253240	1.39332	361.375	1.54433	98.4551	0.000541699
17200	16493	1	130689	257406	3972.22	253433	0.905962	361.509	1.54317	98.4565	0.000351958
17300	16568	1	130771	257571	3972.22	253598	0.481679	361.623	1.54219	98.4576	0.000187008
17400	16637	1	130910	257848	3972.22	253875	0.800451	361.814	1.54053	98.4592	0.000310435
17500	16696	1	131024	258076	3972.22	254103	0.907752	361.972	1.53917	98.4605	0.000351737
17600	16769	1	131099	258226	3972.22	254253	0.753524	362.076	1.53827	98.4614	0.000291808
17700	16828	1	131199	258428	3972.22	254454	1.99143	362.214	1.53707	98.4622	0.000770592
17800	16890	1	131280	258591	3972.22	254615	3.66763	362.325	1.53611	98.4625	0.00141832
17900	16951	1	131361	258751	3972.22	254778	0.98613	362.438	1.53515	98.4645	0.000381112
18000	17006	1	131432	258893	3972.22	254921	0.20675	362.536	1.53431	98.4656	7.98591e-05
18100	17069	1	131567	259161	3972.22	255189	0	362.721	1.53272	98.4673	0
18200	17117	1	131637	259302	3972.22	255330	0	362.818	1.53189	98.4681	0
18300	17170	1	131722	259472	3972.22	255499	0	362.935	1.53089	98.4691	0
18400	17208	1	131830	259688	3972.22	255715	0.0858408	363.084	1.52962	98.4704	3.30554e-05
18500	17267	1	131944	259916	3972.22	255943	0.61423	363.241	1.52827	98.4715	0.000236319
18600	17314	1	132038	260104	3972.22	256131	0.61423	363.37	1.52717	98.4726	0.000236148
18700	17373	1	132097	260221	3972.22	256249	0.61423	363.451	1.52648	98.4733	0.000236041
18800	17424	1	132169	260366	3972.22	256393	0.833313	363.55	1.52563	98.474	0.000320054
18900	17486	1	132249	260526	3972.22	256554	0.0846458	363.661	1.52469	98.4753	3.24903e-05
19000	17537	1	132313	260653	3972.22	256681	0	363.748	1.52395	98.4761	0
19100	17598	1	132421	260871	3972.22	256898	0	363.898	1.52268	98.4773	0
19200	17650	1	132516	261059	3972.22	257087	0	364.027	1.52158	98.4784	0
19300	17723	1	132649	261326	3972.22	257354	0	364.21	1.52003	98.48	0
19400	17774	1	132737	261502	3972.22	257530	0	364.331	1.519	98.481	0
19500	17815	1	132772	261571	3972.22	257599	0	364.379	1.5186	98.4814	0
19600	17865	1	132877	261781	3972.22	257809	0	364.523	1.51738	98.4826	0
19700	17910	1	132933	261895	3972.22	257922	0	364.6	1.51673	98.4833	0
19800	17950	1	132975	261978	3972.22	258006	0	364.657	1.51624	98.4838	0
19900	17995	1	133021	262070	3972.22	258097	0	364.72	1.51571	98.4843	0
20000	18035	1	133068	262164	3972.22	258192	0	364.785	1.51517	98.4848	0
20100	18086	1	133127	262281	3972.22	258309	0	364.865	1.51449	98.4855	0
20200	18134	1	133202	262431	3972.22	258459	0	364.968	1.51362	98.4864	0
20300	18200	1	133310	262647	3972.22	258675	0	365.116	1.51238	98.4876	0
20400	18239	1	133352	262732	3972.22	258760	0	365.174	1.51189	98.4881	0
20500	18290	1	133413	262854	3972.22	258882	0	365.258	1.51119	98.4888	0
20600	18354	1	133508	263044	3972.22	259072	0	365.388	1.5101	98.4899	0
20700	18414	1	133564	263157	3972.22	259184	0	365.465	1.50945	98.4905	0
20800	18462	1	133603	263234	3972.22	259261	0	365.517	1.50901	98.491	0
20900	18521	1	133646	263320	3972.22	259348	0	365.577	1.50851	98.4915	0
21000	18562	1	133689	263406	3972.22	259434	0	365.635	1.50802	98.492	0

## Sheet: EO_FS
DIST	NL	NC	H	IICnum	Sum_varIIC	Sum_varIICintra	Sum_varIICflux	Sum_varIICconnector	eciic	DISTkm	thetaiicintra	thetaiicflux	thetaiicconnector	thetadiicintra	thetadiicflux	thetadiicconnector
100	23	89	26	2865.52	3215.24	2564.29	602.463	48.5012	53.5305	0.1	79.754	18.7377	1.50848	79.754	18.7377	1.50832
200	72	49	103.967	3463.77	4918.04	2564.29	1798.97	554.796	58.8538	0.2	52.1404	36.5789	11.2808	52.1404	36.5789	11.2808
300	114	34	180.617	3931.59	6032.95	2564.29	2734.6	734.071	62.7024	0.3	42.5046	45.3278	12.1677	42.5046	45.3278	12.1676
400	156	26	252.891	4497.62	7158.01	2564.29	3866.67	727.058	67.0643	0.4	35.824	54.0188	10.1573	35.824	54.0188	10.1572
500	203	18	333.519	5623.32	10569	2564.29	6118.08	1886.6	74.9888	0.5	24.2624	57.8872	17.8504	24.2624	57.8872	17.8504
600	252	13	495.767	8365.39	19017.2	2564.29	11602.2	4850.71	91.4625	0.6	13.484	61.009	25.507	13.484	61.009	25.507
700	291	13	542.693	8934.68	16297.1	2564.29	12740.8	992.028	94.5235	0.7	15.7346	78.1783	6.08714	15.7346	78.1783	6.08713
800	340	12	650.89	10092	19152.5	2564.29	15055.4	1532.74	100.459	0.8	13.3888	78.6084	8.00284	13.3888	78.6084	8.00284
900	400	9	761.429	11367.8	22135.1	2564.29	17607	1963.79	106.62	0.9	11.5847	79.5434	8.87186	11.5847	79.5434	8.87186
1000	452	8	827.075	11939.6	22728	2564.29	18750.6	1413.05	109.269	1	11.2825	82.5003	6.21724	11.2825	82.5003	6.21724
1100	506	8	879.425	12492.3	23583.4	2564.29	19856.1	1163.01	111.769	1.1	10.8733	84.1952	4.93148	10.8733	84.1952	4.93148
1200	551	8	913.952	12665.6	23737.2	2564.29	20202.7	970.249	112.542	1.2	10.8028	85.1098	4.08746	10.8028	85.1097	4.08746
1300	591	8	946.602	12835.9	23804.2	2564.29	20543.3	696.623	113.296	1.3	10.7724	86.3011	2.92647	10.7724	86.3011	2.92647
1400	638	8	993.786	13204.6	24079.5	2564.29	21280.7	234.504	114.911	1.4	10.6493	88.3769	0.973874	10.6493	88.3769	0.973873
1500	700	7	1240.73	16855.4	35332.4	2564.29	28582.3	4185.81	129.828	1.5	7.25761	80.8955	11.8469	7.25761	80.8954	11.8469
1600	750	7	1303.57	17671.6	33583.1	2564.29	30214.6	804.212	132.935	1.6	7.63564	89.9697	2.39469	7.63564	89.9697	2.39469
1700	796	7	1345.6	18030.5	33958.6	2564.29	30932.5	461.757	134.278	1.7	7.55122	91.089	1.35977	7.55122	91.089	1.35976
1800	844	6	1429.66	19117.7	36492.3	2564.29	33106.7	821.33	138.267	1.8	7.02691	90.7224	2.25069	7.02691	90.7224	2.25069
1900	875	6	1452.29	19337.4	36937.3	2564.29	33546.2	826.754	139.059	1.9	6.94227	90.8195	2.23827	6.94227	90.8195	2.23826
2000	919	6	1491.96	19631.9	37174.2	2564.29	34135.2	474.756	140.114	2	6.89802	91.8249	1.27711	6.89802	91.8249	1.27711
2100	955	6	1516.94	19755.9	37321.6	2564.29	34383.1	374.129	140.556	2.1	6.87079	92.1268	1.00245	6.87079	92.1268	1.00245
2200	1000	5	1869.29	25442.6	58759.5	2564.29	45756.6	10438.6	159.507	2.2	4.36404	77.8711	17.7649	4.36404	77.8711	17.7649
2300	1043	4	1917.51	26052.5	59944.3	2564.29	46976.4	10403.6	161.408	2.3	4.27778	78.3667	17.3555	4.27778	78.3667	17.3555
2400	1087	4	1983.36	26690.4	57004	2564.29	48252.3	6187.37	163.372	2.4	4.49843	84.6473	10.8543	4.49843	84.6473	10.8543
2500	1134	4	2041.8	27379.7	57801.8	2564.29	49630.8	5606.8	165.468	2.5	4.43634	85.8636	9.70003	4.43634	85.8636	9.70003
2600	1181	4	2105.41	28069.7	59536.2	2564.29	51010.9	5961.06	167.54	2.6	4.3071	85.6804	10.0125	4.3071	85.6804	10.0125
2700	1218	4	2139.15	28365.4	54777.4	2564.29	51602.2	610.85	168.42	2.7	4.68129	94.2036	1.11515	4.68129	94.2036	1.11515
2800	1263	4	2216.83	29538.3	58443.9	2564.29	53948	1931.57	171.867	2.8	4.3876	92.3074	3.305	4.3876	92.3074	3.30499
2900	1301	4	2258.36	30011.7	59460.3	2564.29	54894.8	2001.19	173.239	2.9	4.3126	92.3218	3.3656	4.3126	92.3218	3.3656
3000	1344	3	2322.28	30480.1	59013.4	2564.29	55831.7	617.362	174.586	3	4.34526	94.6086	1.04614	4.34526	94.6086	1.04614
3100	1384	3	2368.17	30755.1	59422.5	2564.29	56381.6	476.563	175.371	3.1	4.31535	94.8827	0.801992	4.31535	94.8827	0.80199
3200	1426	3	2432.82	31427	60906.1	2564.29	57725.5	616.32	177.277	3.2	4.21023	94.7779	1.01192	4.21023	94.7779	1.01192
3300	1469	3	2473.08	31618.6	61127.6	2564.29	58108.7	454.543	177.816	3.3	4.19497	95.0614	0.743597	4.19497	95.0614	0.743596
3400	1512	3	2517.71	31907	61467.8	2564.29	58685.5	217.952	178.625	3.4	4.17176	95.4737	0.35458	4.17176	95.4737	0.354579
3500	1551	3	2545.8	32097.6	61831.5	2564.29	59066.6	200.629	179.158	3.5	4.14721	95.5283	0.324476	4.14721	95.5283	0.324475
3600	1584	3	2587.42	32446.5	62565	2564.29	59764.4	236.338	180.129	3.6	4.09859	95.5237	0.377748	4.09859	95.5237	0.377747
3700	1621	3	2625.64	32911	63709.1	2564.29	60693.4	451.427	181.414	3.7	4.02499	95.2664	0.708576	4.02499	95.2664	0.708574
3800	1655	3	2650.14	33041.8	63663	2564.29	60955.1	143.676	181.774	3.8	4.0279	95.7464	0.225683	4.0279	95.7464	0.225681
3900	1687	3	2677	33337.4	64231.2	2564.29	61546.3	120.641	182.585	3.9	3.99227	95.8199	0.187822	3.99227	95.8199	0.187821
4000	1717	3	2714.95	33823.3	65495.9	2564.29	62517.9	413.636	183.911	4	3.91519	95.4533	0.631545	3.91519	95.4533	0.631544
4100	1745	3	2741.27	34065	65867.3	2564.29	63001.5	301.538	184.567	4.1	3.89311	95.6491	0.457796	3.89311	95.6491	0.457795
4200	1770	3	2761.75	34461.4	66568.7	2564.29	63794.2	210.181	185.638	4.2	3.85209	95.8322	0.315736	3.85209	95.8322	0.315734
4300	1800	3	2796.67	34753.3	67286.3	2564.29	64378	344.085	186.422	4.3	3.811	95.6776	0.511374	3.811	95.6776	0.511373
4400	1835	3	2829.39	35052.7	67875.5	2564.29	64976.8	334.341	187.224	4.4	3.77793	95.7295	0.49258	3.77793	95.7295	0.492579
4500	1867	3	2855.64	35360.3	68273.6	2564.29	65592	117.265	188.043	4.5	3.7559	96.0723	0.171758	3.7559	96.0723	0.171756
4600	1894	3	2876.06	35562.4	68698.6	2564.29	65996.1	138.145	188.58	4.6	3.73266	96.0662	0.201088	3.73266	96.0663	0.201087
4700	1928	3	2900.47	35734.2	68978	2564.29	66339.9	73.7778	189.035	4.7	3.71754	96.1755	0.106959	3.71754	96.1755	0.106957
4800	1957	3	2934.89	36011.2	69614.4	2564.29	66893.8	156.294	189.766	4.8	3.68355	96.0919	0.224514	3.68356	96.0919	0.224512
4900	1989	3	2959.06	36186.8	69884.1	2564.29	67245.1	74.7598	190.228	4.9	3.66934	96.2237	0.106977	3.66934	96.2237	0.106976
5000	2016	2	3005.31	36424.9	70508.2	2564.29	67721.2	222.805	190.853	5	3.63686	96.0471	0.315998	3.63686	96.0471	0.315997
5100	2045	2	3027.06	36547	70655.5	2564.29	67965.3	125.852	191.173	5.1	3.62928	96.1926	0.178121	3.62928	96.1926	0.17812
5200	2083	2	3055.14	36685.7	70847.1	2564.29	68242.7	40.1102	191.535	5.2	3.61946	96.3239	0.0566151	3.61946	96.3239	0.0566139
5300	2113	2	3085.89	36851.5	71245.5	2564.29	68574.4	106.749	191.967	5.3	3.59923	96.2509	0.149832	3.59923	96.2509	0.149831
5400	2145	2	3114.47	37009.5	71580.6	2564.29	68890.4	125.938	192.378	5.4	3.58237	96.2417	0.175938	3.58237	96.2417	0.175937
5500	2175	2	3139.39	37098.5	71761.2	2564.29	69068.4	128.531	192.61	5.5	3.57336	96.2475	0.179109	3.57336	96.2475	0.179108
5600	2215	2	3168.3	37268.5	72035.6	2564.29	69408.5	62.8844	193.051	5.6	3.55974	96.353	0.0872962	3.55974	96.353	0.0872949
5700	2252	2	3192.55	37413	72296.7	2564.29	69697.4	35.0302	193.424	5.7	3.54689	96.4047	0.0484533	3.54689	96.4047	0.0484521
5800	2285	2	3227.39	37822	73404	2564.29	70515.5	324.241	194.479	5.8	3.49338	96.0649	0.441721	3.49338	96.0649	0.44172
5900	2320	2	3253.47	37959.5	73604.4	2564.29	70790.3	249.768	194.832	5.9	3.48388	96.1768	0.339338	3.48388	96.1768	0.339337
6000	2374	1	3763.45	42087.4	89312.1	2564.29	79046.2	7701.61	205.152	6	2.87115	88.5056	8.62326	2.87115	88.5056	8.62326
6100	2418	1	3817.02	42329.1	82281.5	2564.29	79529.6	187.602	205.74	6.1	3.11648	96.6555	0.228	3.11648	96.6555	0.228
6200	2458	1	3843.85	42541.8	82666.2	2564.29	79955	146.862	206.257	6.2	3.10198	96.7204	0.177657	3.10198	96.7204	0.177657
6300	2508	1	3906.69	42859.7	83393.8	2564.29	80590.8	238.697	207.026	6.3	3.07491	96.6389	0.286228	3.07491	96.6389	0.286228
6400	2551	1	3982.55	43330.6	84587.7	2564.29	81532.6	490.83	208.16	6.4	3.03151	96.3882	0.580262	3.03151	96.3882	0.580262
6500	2594	1	4044.57	43652.3	85008.7	2564.29	82176	268.456	208.931	6.5	3.0165	96.6677	0.315798	3.0165	96.6677	0.315798
6600	2648	1	4089.34	43842.9	85261.1	2564.29	82557.2	139.568	209.387	6.6	3.00757	96.8287	0.163695	3.00757	96.8287	0.163695
6700	2689	1	4135.64	44162.6	86021.6	2564.29	83196.7	260.574	210.149	6.7	2.98098	96.7161	0.302917	2.98098	96.7161	0.302917
6800	2723	1	4172.21	44277.4	86225	2564.29	83426.2	234.509	210.422	6.8	2.97395	96.7541	0.271973	2.97395	96.7541	0.271973
6900	2775	1	4218.16	44600.2	86759.5	2564.29	84071.8	123.377	211.188	6.9	2.95563	96.9022	0.142206	2.95563	96.9022	0.142206
7000	2807	1	4245.93	44670.4	86899.4	2564.29	84212.1	123.012	211.354	7	2.95086	96.9076	0.141557	2.95086	96.9076	0.141557
7100	2851	1	4280.74	44859.9	87288.1	2564.29	84591.3	132.556	211.802	7.1	2.93772	96.9104	0.151861	2.93772	96.9104	0.151861
7200	2893	1	4311.62	44984.4	87465.1	2564.29	84840.2	60.5984	212.095	7.2	2.93178	96.9989	0.0692829	2.93178	96.9989	0.0692829
7300	2919	1	4325.95	45024.7	87516.1	2564.29	84920.9	30.8573	212.19	7.3	2.93007	97.0347	0.035259	2.93007	97.0347	0.035259
7400	2953	1	4346.61	45125.5	87727.6	2564.29	85122.5	40.89	212.428	7.4	2.92301	97.0304	0.0466102	2.92301	97.0304	0.0466102
7500	2989	1	4374.13	45313	88161.8	2564.29	85497.4	100.094	212.868	7.5	2.90861	96.9779	0.113534	2.90861	96.9778	0.113534
7600	3023	1	4393.13	45396.6	88282.2	2564.29	85664.7	53.2596	213.065	7.6	2.90465	97.035	0.0603288	2.90465	97.035	0.0603288
7700	3058	1	4413.63	45460.5	88417.1	2564.29	85792.5	60.2882	213.215	7.7	2.90021	97.0316	0.0681862	2.90021	97.0316	0.0681862
7800	3094	1	4438.56	45656.6	88837.8	2564.29	86184.6	88.9359	213.674	7.8	2.88648	97.0134	0.10011	2.88648	97.0134	0.10011
7900	3120	1	4453.55	45725.2	89005.3	2564.29	86321.9	119.153	213.835	7.9	2.88105	96.9851	0.133872	2.88105	96.9851	0.133872
8000	3158	1	4484.22	45890.6	89357.3	2564.29	86652.7	140.288	214.221	8	2.8697	96.9733	0.156997	2.8697	96.9733	0.156997
8100	3196	1	4514.78	46006.2	89545.6	2564.29	86883.8	97.568	214.49	8.1	2.86366	97.0274	0.108959	2.86366	97.0274	0.108959
8200	3228	1	4538.76	46109.6	89736.6	2564.29	87090.6	81.734	214.731	8.2	2.85757	97.0513	0.0910821	2.85757	97.0514	0.0910821
8300	3274	1	4574.38	46302.9	90161.7	2564.29	87477.2	120.23	215.181	8.3	2.8441	97.0226	0.133349	2.8441	97.0226	0.133349
8400	3311	1	4594.14	46415.4	90360.9	2564.29	87702.2	94.4183	215.442	8.4	2.83782	97.0577	0.10449	2.83783	97.0577	0.10449
8500	3344	1	4620.35	46545.4	90550	2564.29	87962.2	23.4756	215.744	8.5	2.8319	97.1422	0.0259256	2.8319	97.1422	0.0259255
8600	3385	1	4644.98	46761.9	91009.2	2564.29	88395.3	49.6322	216.245	8.6	2.81761	97.1279	0.0545354	2.81761	97.1278	0.0545353
8700	3436	1	4675.98	46909.4	91315.8	2564.29	88690.1	61.4054	216.586	8.7	2.80815	97.1246	0.0672451	2.80815	97.1246	0.0672451
8800	3479	1	4700.73	47047.5	91612.8	2564.29	88966.5	81.9829	216.904	8.8	2.79905	97.1115	0.0894885	2.79905	97.1115	0.0894885
8900	3517	1	4726.49	47244.4	92004.2	2564.29	89360.3	79.6478	217.358	8.9	2.78714	97.1263	0.0865697	2.78714	97.1263	0.0865697
9000	3550	1	4745.49	47297	92098.4	2564.29	89465.5	68.6539	217.479	9	2.78429	97.1412	0.074544	2.78429	97.1412	0.074544
9100	3588	1	4770.29	47404.9	92329.3	2564.29	89681.2	83.8312	217.727	9.1	2.77733	97.1319	0.0907959	2.77733	97.1319	0.0907959
9200	3635	1	4796.47	47538.4	92585.8	2564.29	89948.3	73.2067	218.033	9.2	2.76963	97.1513	0.0790691	2.76963	97.1513	0.0790691
9300	3682	1	4823.43	47622.8	92741.7	2564.29	90116.9	60.4826	218.226	9.3	2.76498	97.1698	0.0652162	2.76498	97.1698	0.0652162
9400	3708	1	4839.48	47684.8	92846.9	2564.29	90241.1	41.5221	218.369	9.4	2.76184	97.1934	0.044721	2.76184	97.1934	0.044721
9500	3754	1	4866.14	47843.3	93155.9	2564.29	90558	33.5322	218.731	9.5	2.75268	97.2113	0.0359959	2.75268	97.2113	0.0359958
9600	3792	1	4898.07	48085.5	93650.7	2564.29	91042.4	44.0394	219.284	9.6	2.73814	97.2148	0.0470251	2.73814	97.2148	0.0470251
9700	3825	1	4915.82	48144.3	93754.5	2564.29	91160.1	30.0849	219.418	9.7	2.73511	97.2328	0.0320891	2.73511	97.2328	0.0320891
9800	3864	1	4943.15	48436	94309	2564.29	91743.4	1.35722	220.082	9.8	2.71902	97.2795	0.00143911	2.71902	97.2795	0.00143912
9900	3899	1	4966.73	48536.4	94539.1	2564.29	91944.1	30.6538	220.31	9.9	2.71241	97.2552	0.0324245	2.71241	97.2552	0.0324245
10000	3933	1	4987.07	48698.9	94870	2564.29	92269.3	36.3634	220.678	10	2.70295	97.2587	0.0383298	2.70295	97.2587	0.0383298
10100	3969	1	5006.82	48813.9	95087.9	2564.29	92499.2	24.3777	220.939	10.1	2.69675	97.2776	0.025637	2.69675	97.2776	0.025637
10200	3999	1	5024.32	48883	95205.1	2564.29	92637.4	3.36165	221.095	10.2	2.69343	97.303	0.00353095	2.69343	97.303	0.00353094
10300	4035	1	5047.15	48938.3	95324.4	2564.29	92748	12.0937	221.22	10.3	2.69006	97.2973	0.0126869	2.69006	97.2973	0.0126868
10400	4065	1	5067.48	49032.7	95526.4	2564.29	92936.9	25.2184	221.433	10.4	2.68437	97.2892	0.0263994	2.68437	97.2892	0.0263995
10500	4099	1	5089.32	49133.6	95731	2564.29	93138.6	28.092	221.661	10.5	2.67864	97.292	0.0293448	2.67864	97.292	0.0293448
10600	4131	1	5106.98	49220.4	95898.4	2564.29	93312.3	21.812	221.857	10.6	2.67396	97.3033	0.0227449	2.67396	97.3033	0.0227449
10700	4157	1	5122.48	49386.9	96262.9	2564.29	93645.3	53.3254	222.232	10.7	2.66383	97.2808	0.0553955	2.66384	97.2808	0.0553955
10800	4189	1	5140.82	49541.5	96561.8	2564.29	93954.4	43.0389	222.579	10.8	2.65559	97.2998	0.0445714	2.65559	97.2998	0.0445713
10900	4217	1	5156.32	49616.4	96688.4	2564.29	94104.1	19.9608	222.747	10.9	2.65211	97.3272	0.0206445	2.65211	97.3272	0.0206445
11000	4237	1	5166.98	49666.4	96788	2564.29	94204.3	19.393	222.86	11	2.64938	97.3306	0.0200366	2.64938	97.3306	0.0200366
11100	4264	1	5181.32	49767	96981.3	2564.29	94405.4	11.5727	223.085	11.1	2.6441	97.344	0.0119329	2.6441	97.344	0.0119329
11200	4305	1	5210.49	49952.2	97365.9	2564.29	94775.8	25.7942	223.5	11.2	2.63366	97.3398	0.026492	2.63366	97.3399	0.026492
11300	4327	1	5221.82	50006.8	97470.7	2564.29	94885	21.4452	223.622	11.3	2.63083	97.3472	0.0220017	2.63083	97.3472	0.0220017
11400	4354	1	5235.82	50160.2	97764.8	2564.29	95191.9	8.63865	223.965	11.4	2.62291	97.3683	0.00883616	2.62291	97.3682	0.00883615
11500	4384	1	5251.82	50275.3	97993.3	2564.29	95422.1	6.93225	224.222	11.5	2.6168	97.3761	0.00707421	2.6168	97.3761	0.00707417
11600	4401	1	5261.82	50349.6	98137.1	2564.29	95570.6	2.20342	224.387	11.6	2.61296	97.3848	0.00224524	2.61296	97.3848	0.00224523
11700	4429	1	5278.82	50440.4	98322.2	2564.29	95752.2	5.71168	224.589	11.7	2.60804	97.3861	0.00580915	2.60804	97.3861	0.00580913
11800	4449	1	5291.65	50475.7	98399.5	2564.29	95822.7	12.4676	224.668	11.8	2.60599	97.3813	0.0126704	2.60599	97.3813	0.0126704
11900	4481	1	5309.82	50609.8	98662.3	2564.29	96091	7.01208	224.966	11.9	2.59905	97.3938	0.00710715	2.59905	97.3938	0.00710716
12000	4512	1	5326.99	50773.6	99011.2	2564.29	96418.7	28.2102	225.33	12	2.58989	97.3816	0.0284919	2.58989	97.3816	0.0284919
12100	4538	1	5341.49	50862.6	99187.8	2564.29	96596.7	26.7722	225.527	12.1	2.58528	97.3877	0.0269915	2.58528	97.3877	0.0269915
12200	4564	1	5355.32	51039.4	99567.8	2564.29	96950.2	53.3596	225.919	12.2	2.57542	97.371	0.0535912	2.57542	97.371	0.0535912
12300	4590	1	5368.32	51135.1	99721.8	2564.29	97141.7	15.7949	226.131	12.3	2.57144	97.4127	0.015839	2.57144	97.4127	0.015839
12400	4616	1	5381.99	51204.5	99856.2	2564.29	97280.4	11.5502	226.284	12.4	2.56798	97.4205	0.0115668	2.56798	97.4205	0.0115668
12500	4643	1	5396.15	51307.3	100079	2564.29	97486	29.1055	226.511	12.5	2.56225	97.4087	0.0290823	2.56225	97.4087	0.0290824
12600	4664	1	5408.32	51372.3	100204	2564.29	97616	24.0158	226.655	12.6	2.55906	97.417	0.0239668	2.55906	97.417	0.0239668
12700	4694	1	5423.99	51452.2	100360	2564.29	97775.8	20.3717	226.831	12.7	2.55508	97.4246	0.0202985	2.55508	97.4246	0.0202986
12800	4730	1	5443.32	51521.5	100500	2564.29	97914.4	21.2216	226.983	12.8	2.55153	97.4273	0.0211161	2.55153	97.4274	0.0211161
12900	4756	1	5456.82	51559	100574	2564.29	97989.5	20.0371	227.066	12.9	2.54965	97.4304	0.0199228	2.54965	97.4304	0.0199228
13000	4788	1	5473.82	51706.6	100875	2564.29	98284.6	25.7823	227.391	13	2.54205	97.4324	0.0255587	2.54205	97.4324	0.0255587
13100	4830	1	5495.65	51818.7	101074	2564.29	98508.9	0.727515	227.637	13.1	2.53704	97.4622	0.000719785	2.53704	97.4622	0.000719805
13200	4870	1	5517.65	51907.6	101252	2564.29	98686.7	1.05779	227.832	13.2	2.53258	97.4664	0.00104471	2.53258	97.4664	0.00104469
13300	4907	1	5537.48	51967	101371	2564.29	98805.5	1.3426	227.963	13.3	2.5296	97.4691	0.00132444	2.5296	97.4691	0.00132446
13400	4949	1	5558.48	52043.2	101522	2564.29	98957.8	0	228.13	13.4	2.52584	97.4742	0	2.52584	97.4742	0
13500	4981	1	5575.15	52116	101671	2564.29	99103.4	3.5931	228.289	13.5	2.52213	97.4743	0.00353404	2.52213	97.4743	0.00353402
13600	5018	1	5593.65	52174.1	101784	2564.29	99219.7	0	228.417	13.6	2.51934	97.4807	0	2.51934	97.4807	0
13700	5051	1	5610.15	52239.6	101915	2564.29	99350.7	0	228.56	13.7	2.5161	97.4839	0	2.5161	97.4839	0
13800	5074	1	5622.98	52271.3	101983	2564.29	99414.1	4.17272	228.629	13.8	2.51444	97.4815	0.0040916	2.51444	97.4815	0.00409165
13900	5097	1	5635.15	52310.3	102060	2564.29	99491.9	4.09976	228.714	13.9	2.51252	97.4835	0.004017	2.51252	97.4835	0.004017
14000	5127	1	5650.15	52420.5	102277	2564.29	99712.4	0	228.955	14	2.5072	97.4928	0	2.5072	97.4928	0
14100	5144	1	5659.98	52437.9	102313	2564.29	99747.2	1.23418	228.993	14.1	2.50632	97.4925	0.00120628	2.50632	97.4925	0.00120628
14200	5171	1	5673.48	52537.4	102511	2564.29	99946.2	0	229.21	14.2	2.50148	97.4985	0	2.50148	97.4985	0
14300	5194	1	5684.98	52586.7	102609	2564.29	100045	0	229.318	14.3	2.49908	97.5009	0	2.49908	97.5009	0
14400	5209	1	5692.48	52632.7	102701	2564.29	100137	0	229.418	14.4	2.49684	97.5032	0	2.49685	97.5032	0
14500	5229	1	5703.15	52662.1	102761	2564.29	100196	0.621585	229.482	14.5	2.4954	97.504	0.000604887	2.4954	97.504	0.000604873
14600	5248	1	5713.32	52682.7	102802	2564.29	100237	0.503164	229.527	14.6	2.4944	97.5051	0.000489452	2.4944	97.5051	0.00048946
14700	5260	1	5719.32	52691.3	102819	2564.29	100254	0.503164	229.546	14.7	2.49398	97.5055	0.00048937	2.49399	97.5055	0.000489355
14800	5288	1	5733.98	52754.4	102946	2564.29	100380	1.0538	229.683	14.8	2.49091	97.5081	0.00102364	2.49091	97.5081	0.00102367
14900	5306	1	5746.82	52781.1	103007	2564.29	100434	8.61325	229.741	14.9	2.48944	97.5022	0.00836185	2.48944	97.5022	0.00836184
15000	5323	1	5759.49	52812.8	103070	2564.29	100497	8.90101	229.81	15	2.4879	97.5035	0.00863587	2.4879	97.5035	0.00863588
15100	5337	1	5766.82	52834.1	103105	2564.29	100540	0.628631	229.857	15.1	2.48707	97.5123	0.000609702	2.48707	97.5123	0.000609692
15200	5351	1	5777.66	52859.3	103154	2564.29	100590	0	229.911	15.2	2.48587	97.5141	0	2.48587	97.5141	0
15300	5367	1	5786.16	52885.3	103207	2564.29	100642	0.996465	229.968	15.3	2.4846	97.5144	0.000965498	2.4846	97.5144	0.000965498
15400	5376	1	5791.5	52890.9	103218	2564.29	100653	0.731734	229.98	15.4	2.48433	97.515	0.000708919	2.48433	97.515	0.00070893
15500	5393	1	5800.5	52905.2	103247	2564.29	100682	0.977729	230.011	15.5	2.48364	97.5154	0.000946979	2.48364	97.5154	0.000946991
15600	5399	1	5803.5	52916.3	103269	2564.29	100704	0.977729	230.035	15.6	2.48311	97.5159	0.000946776	2.48311	97.5159	0.000946781
15700	5413	1	5810.66	52934.3	103305	2564.29	100740	0.319264	230.075	15.7	2.48226	97.5174	0.000309051	2.48226	97.5174	0.000309034
15800	5418	1	5813.16	52942.8	103322	2564.29	100757	0.319264	230.093	15.8	2.48185	97.5178	0.000309	2.48185	97.5178	0.000308982
15900	5433	1	5821	52978.8	103396	2564.29	100829	2.199	230.171	15.9	2.48007	97.5178	0.00212678	2.48007	97.5178	0.00212678
16000	5439	1	5824	52995.7	103429	2564.29	100863	2.199	230.208	16	2.47926	97.5186	0.00212609	2.47926	97.5186	0.00212609
16100	5451	1	5830.16	53051.9	103540	2564.29	100975	0.0975917	230.33	16.1	2.47662	97.5233	9.42555e-05	2.47662	97.5233	9.42784e-05
16200	5464	1	5836.66	53102.8	103641	2564.29	101077	0.0975917	230.441	16.2	2.47419	97.5257	9.41628e-05	2.47419	97.5257	9.41737e-05
16300	5471	1	5840.16	53149.5	103735	2564.29	101170	0	230.542	16.3	2.47196	97.528	0	2.47196	97.528	0
16400	5488	1	5848.83	53172.6	103782	2564.29	101217	0.843869	230.592	16.4	2.47085	97.5283	0.00081312	2.47085	97.5283	0.0008131
16500	5503	1	5859.5	53204.8	103845	2564.29	101281	0	230.662	16.5	2.46933	97.5307	0	2.46933	97.5307	0
16600	5517	1	5866.5	53230	103896	2564.29	101331	0	230.716	16.6	2.46813	97.5319	0	2.46813	97.5319	0
16700	5532	1	5874	53257.5	103951	2564.29	101386	0	230.776	16.7	2.46683	97.5332	0	2.46683	97.5332	0
16800	5544	1	5880	53282.3	104000	2564.29	101436	0	230.83	16.8	2.46565	97.5343	0	2.46565	97.5343	0
16900	5557	1	5886.5	53291.6	104019	2564.29	101455	0	230.85	16.9	2.46521	97.5348	0	2.46521	97.5348	0
17000	5566	1	5891	53307.3	104050	2564.29	101486	0	230.884	17	2.46447	97.5355	0	2.46447	97.5355	0
17100	5577	1	5896.5	53323.1	104082	2564.29	101518	0	230.918	17.1	2.46372	97.5363	0	2.46372	97.5363	0
17200	5585	1	5900.5	53337	104110	2564.29	101546	0	230.948	17.2	2.46306	97.5369	0	2.46306	97.5369	0
17300	5597	1	5906.5	53347.7	104131	2564.29	101567	0	230.971	17.3	2.46255	97.5374	0	2.46255	97.5374	0
17400	5611	1	5913.5	53382.4	104201	2564.29	101636	0	231.046	17.4	2.46091	97.5391	0	2.46091	97.5391	0
17500	5618	1	5917	53393	104222	2564.29	101657	0	231.069	17.5	2.46041	97.5396	0	2.46041	97.5396	0
17600	5630	1	5923	53401.6	104239	2564.29	101675	0	231.088	17.6	2.46001	97.54	0	2.46001	97.54	0
17700	5636	1	5926	53406.2	104248	2564.29	101684	0	231.098	17.7	2.45979	97.5402	0	2.45979	97.5402	0
17800	5648	1	5932	53415.3	104266	2564.29	101702	0	231.118	17.8	2.45936	97.5406	0	2.45936	97.5406	0
17900	5658	1	5937	53429.7	104295	2564.29	101731	0	231.149	17.9	2.45868	97.5413	0	2.45868	97.5413	0
18000	5664	1	5940	53437	104310	2564.29	101745	0	231.164	18	2.45834	97.5417	0	2.45834	97.5417	0
18100	5673	1	5944.5	53467.1	104370	2564.29	101806	0	231.23	18.1	2.45692	97.5431	0	2.45692	97.5431	0
18200	5682	1	5949	53474	104384	2564.29	101819	0	231.244	18.2	2.45659	97.5434	0	2.4566	97.5434	0
18300	5691	1	5953.5	53503.9	104444	2564.29	101879	0	231.309	18.3	2.45519	97.5448	0	2.45519	97.5448	0
18400	5699	1	5957.5	53515.4	104466	2564.29	101902	0	231.334	18.4	2.45465	97.5454	0	2.45465	97.5454	0
18500	5709	1	5962.5	53523.5	104483	2564.29	101918	0	231.351	18.5	2.45427	97.5457	0	2.45427	97.5457	0
18600	5726	1	5971	53545.5	104527	2564.29	101963	0	231.399	18.6	2.45323	97.5468	0	2.45323	97.5468	0
18700	5739	1	5977.5	53555.6	104547	2564.29	101983	0	231.421	18.7	2.45276	97.5472	0	2.45276	97.5472	0
18800	5748	1	5982	53576.6	104589	2564.29	102025	0	231.466	18.8	2.45177	97.5482	0	2.45177	97.5482	0
18900	5760	1	5988	53591.3	104618	2564.29	102054	0	231.498	18.9	2.45109	97.5489	0	2.45109	97.5489	0
19000	5771	1	5993.5	53607.2	104650	2564.29	102086	0	231.532	19	2.45034	97.5497	0	2.45034	97.5497	0
19100	5786	1	6001	53619.4	104674	2564.29	102110	0	231.559	19.1	2.44977	97.5502	0	2.44977	97.5502	0
19200	5794	1	6005	53626.5	104689	2564.29	102124	0	231.574	19.2	2.44944	97.5506	0	2.44944	97.5506	0
19300	5806	1	6011	53647.3	104730	2564.29	102166	0	231.619	19.3	2.44846	97.5515	0	2.44846	97.5515	0
19400	5816	1	6016	53669.1	104774	2564.29	102210	0	231.666	19.4	2.44745	97.5526	0	2.44745	97.5526	0
19500	5823	1	6019.5	53671.5	104779	2564.29	102214	0	231.671	19.5	2.44734	97.5527	0	2.44733	97.5527	0
19600	5835	1	6025.5	53691.4	104819	2564.29	102254	0	231.714	19.6	2.4464	97.5536	0	2.4464	97.5536	0
19700	5845	1	6030.5	53713.6	104863	2564.29	102299	0	231.762	19.7	2.44537	97.5546	0	2.44537	97.5546	0
19800	5852	1	6034	53721	104878	2564.29	102313	0	231.778	19.8	2.44502	97.555	0	2.44502	97.555	0
19900	5860	1	6038	53734.1	104904	2564.29	102340	0	231.806	19.9	2.44441	97.5556	0	2.44441	97.5556	0
20000	5871	1	6043.5	53745.5	104927	2564.29	102362	0	231.831	20	2.44388	97.5561	0	2.44388	97.5561	0
20100	5879	1	6047.5	53763.4	104963	2564.29	102398	0	231.869	20.1	2.44305	97.557	0	2.44305	97.557	0
20200	5888	1	6052	53783.4	105003	2564.29	102438	0	231.913	20.2	2.44212	97.5579	0	2.44212	97.5579	0
20300	5900	1	6058	53812.9	105061	2564.29	102497	0	231.976	20.3	2.44075	97.5593	0	2.44075	97.5593	0
20400	5904	1	6060	53813.4	105063	2564.29	102498	0	231.977	20.4	2.44072	97.5593	0	2.44072	97.5593	0
20500	5912	1	6064	53844.3	105124	2564.29	102560	0	232.044	20.5	2.43929	97.5607	0	2.43929	97.5607	0
20600	5922	1	6069	53857.5	105151	2564.29	102586	0	232.072	20.6	2.43868	97.5613	0	2.43868	97.5613	0
20700	5926	1	6071	53859.6	105155	2564.29	102591	0	232.077	20.7	2.43858	97.5614	0	2.43858	97.5614	0
20800	5935	1	6075.5	53880.5	105197	2564.29	102632	0	232.122	20.8	2.43761	97.5624	0	2.43761	97.5624	0
20900	5942	1	6079	53882.4	105200	2564.29	102636	0	232.126	20.9	2.43752	97.5625	0	2.43752	97.5625	0
21000	5948	1	6082	53897.6	105231	2564.29	102667	0	232.159	21	2.43682	97.5632	0	2.43682	97.5632	0

## Sheet: EP_ALL
DIST	NL	NC	IICnum	Sum_varIIC	Sum_varIICintra	Sum_varIICflux	Sum_varIICconnector	eciic	thetaiicintra	thetaiicflux	thetaiicconnector	dECIICch	dECIICfs	da_ecch	da_ecfs	propda_ecch	propda_ecfs	propec_dach	propec_dafs	diff__fs_thetaintra	diff__ch_thetaintra	diff__fs_thetaconnector	diff__ch_thetaconnector	diff__fs_thetaflux	diff__ch_thetaflux
100	17	70	9642.95	10309.9	9022.56	1240.78	46.5974	98.1985	87.5133	12.0348	0.451966	0.0331932	0.168649	0.0456356	0.162432	2.37485	1.96313	0.421079	0.509389	-5.87137	-4.84911	0.290313	0.300813	5.58111	4.54831
200	32	59	9854.83	10755.3	9022.56	1664.55	68.2029	99.2715	83.8894	15.4766	0.634133	0.0326049	0.173628	0.046224	0.157453	2.4177	1.90684	0.413616	0.524427	-7.47622	-4.32038	0.160769	0.255722	7.3155	4.06467
300	49	48	10868.8	13587.9	9022.56	3692.45	872.877	104.253	66.4015	27.1746	6.42394	0.0222846	0.114312	0.0565442	0.216769	3.53737	2.89628	0.282696	0.34527	15.2521	-0.467012	-9.33518	-0.0380742	-5.91687	0.505099
400	78	36	13259.4	19351.4	9022.56	8473.77	1855.04	115.15	46.6249	43.789	9.58611	0.0726943	0.147006	0.00613451	0.184075	1.08439	2.25216	0.922179	0.444018	1.79763	-10.5087	-0.975686	2.85582	-0.821923	7.65293
500	100	31	13720.1	19975.3	9022.56	9395.18	1557.55	117.133	45.1686	47.034	7.79741	0.0261119	0.142037	0.0527169	0.189044	3.01889	2.33096	0.331248	0.429009	3.04908	-0.0509933	-2.25808	-1.56018	-0.790968	1.61119
600	119	25	14099.6	19944.8	9022.56	10154	768.296	118.742	45.2375	50.9104	3.85211	0.0289923	0.147122	0.0498366	0.183959	2.71896	2.25038	0.367788	0.444369	1.37726	-0.910548	-0.353525	-0.651722	-1.02372	1.56228
700	140	23	16720.3	28548	9022.56	15395.5	4129.93	129.307	31.6049	53.9286	14.4666	0.038229	0.159997	0.0405999	0.171084	2.06202	2.06929	0.484962	0.483257	-0.674005	0.574624	0.418113	-5.75654	0.255909	5.18192
800	165	20	18305.1	30994.2	9022.56	18565.1	3406.55	135.296	29.1104	59.8987	10.9909	0.0310932	0.176841	0.0477357	0.15424	2.53525	1.8722	0.394439	0.534131	-4.56506	0.786353	6.9913	-4.95368	-2.42623	4.16733
900	190	16	20112.3	36561.6	9022.56	22179.4	5359.59	141.818	24.6777	60.6632	14.6591	0.0389596	0.17001	0.0398693	0.161071	2.02335	1.94743	0.49423	0.513498	-2.14777	0.0287485	3.22131	-4.27466	-1.07354	4.24591
1000	217	16	21076.6	36866.3	9022.56	24108	3735.68	145.178	24.4737	65.3932	10.133	0.0310999	0.17004	0.047729	0.161042	2.5347	1.94708	0.394524	0.513589	-2.05597	-0.608874	3.18163	-0.365168	-1.12565	0.974041
1100	233	16	21189.6	36811.6	9022.56	24334	3455.03	145.566	24.5101	66.1042	9.3857	0.0287836	0.167186	0.0500452	0.163895	2.73867	1.98032	0.36514	0.504969	-1.80112	-0.548689	3.12501	-0.0329536	-1.32388	0.581655
1200	260	14	25283.3	49175.6	9022.56	32521.5	7631.57	159.007	18.3476	66.1334	15.519	0.0335695	0.199407	0.0452593	0.131674	2.34823	1.66033	0.425853	0.602289	-4.49377	-0.720377	7.59488	0.413042	-3.1011	0.307339
1300	286	10	28506.2	56376.6	9022.56	38967.4	8386.65	168.838	16.0041	69.1198	14.8761	0.0325454	0.244001	0.0462835	0.0870796	2.42212	1.35688	0.412861	0.736984	-6.70897	-0.384091	7.04782	-0.557376	-0.338836	0.941477
1400	306	10	29033.8	57127.5	9022.56	40022.5	8082.43	170.393	15.7937	70.0582	14.1481	0.0363036	0.248309	0.0425253	0.0827724	2.17138	1.33335	0.460537	0.749993	-6.74923	-0.558328	6.42013	-0.403182	0.329102	0.961511
1500	321	10	29775.5	57992.6	9022.56	41505.9	7464.19	172.556	15.5581	71.5709	12.8709	0.0360508	0.248233	0.0427781	0.0828483	2.18661	1.33375	0.45733	0.749764	-7.05253	-0.494045	8.38573	-0.640773	-1.33321	1.13482
1600	347	9	41380.6	101277	9022.56	64716	27538.5	203.422	8.90879	63.9	27.1912	0.0308665	0.357483	0.0479624	-0.0264018	2.55387	0.926145	0.391563	1.07974	-14.0361	-0.19993	25.9369	-0.181104	-11.9008	0.381033
1700	384	7	45939	114366	9022.56	73833	31510.1	214.334	7.88922	64.5587	27.5521	0.0762551	0.386668	0.00257368	-0.0555868	1.03375	0.856241	0.967351	1.16789	-14.677	-1.20569	26.0561	0.77218	-11.3791	0.433503
1800	412	5	46760.3	116553	9022.56	75475.5	32054.5	216.241	7.74119	64.7566	27.5022	0.0811462	0.292071	-0.00231737	0.0390102	0.971442	1.13356	1.0294	0.882173	-4.18459	-1.31094	2.34222	0.961755	1.84237	0.349171
1900	461	5	48398.3	102632	9022.56	78751.4	14857.6	219.996	8.79121	76.7322	14.4766	0.0816319	0.29925	-0.00280307	0.0318312	0.965662	1.10637	1.03556	0.903857	-4.65709	-0.432508	0.254972	-7.81824	4.40211	8.25074
2000	497	5	50702.3	108638	9022.56	83359.5	16255.9	225.172	8.30516	76.7315	14.9634	0.0824751	0.24907	-0.0036463	0.0820114	0.955789	1.32927	1.04626	0.752292	-1.2206	-0.375811	-10.0089	-8.16635	11.2295	8.54218
2100	539	5	51209.1	108120	9022.56	84373.1	14724	226.294	8.34498	78.0368	13.6182	0.0460547	0.251991	0.0327741	0.0790901	1.71163	1.31386	0.584237	0.761116	-1.17729	0.86168	-11.1996	-13.3492	12.3769	12.4875
2200	575	5	52279.2	111925	9022.56	86513.2	16389.5	228.646	8.06123	77.2955	14.6433	0.0457708	0.258005	0.033058	0.0730757	1.72225	1.28323	0.580635	0.779281	-2.05091	0.755469	-5.1085	-12.3664	7.15941	11.611
2300	616	5	53248.6	113164	9022.56	88452.1	15689.7	230.757	7.97297	78.1625	13.8645	0.0433054	0.255623	0.0355234	0.075458	1.8203	1.29519	0.54936	0.772086	-1.95308	0.6736	-5.13818	-11.2986	7.09125	10.625
2400	660	5	54096.6	115156	9022.56	90148.1	15985.3	232.587	7.83507	78.2835	13.8814	0.0428104	0.258378	0.0360185	0.0727033	1.84135	1.28138	0.54308	0.780406	-2.59147	0.456122	-0.232979	-9.05614	2.82444	8.60001
2500	698	5	55135.6	103296	9022.56	92226.1	2047.02	234.81	8.73469	89.2836	1.98171	0.0426816	0.261302	0.0361472	0.0697793	1.8469	1.26704	0.541447	0.789238	-2.98395	0.634087	-0.27873	-11.6135	3.26268	10.9794
2600	726	5	55607.1	104549	9022.56	93169.2	2357.15	235.812	8.62999	89.1154	2.25459	0.0435456	0.25535	0.0352833	0.0757306	1.81026	1.29658	0.552407	0.771263	-2.61324	0.58362	-1.35934	-11.287	3.97259	10.7034
2700	754	5	59460.1	113932	9022.56	100875	4033.9	243.845	7.91927	88.5401	3.54063	0.0417584	0.275592	0.0370705	0.0554892	1.88774	1.20135	0.529735	0.8324	-3.31926	-0.373738	1.1718	-0.212298	2.14746	0.586031
2800	780	5	59994.1	114197	9022.56	101943	3231.92	244.937	7.90084	89.269	2.83011	0.0418195	0.264657	0.0370094	0.0664242	1.88498	1.25098	0.53051	0.799372	-2.7367	-0.375083	-0.671681	-0.197827	3.40837	0.572899
2900	822	5	60693.2	114959	9022.56	103341	2595.15	246.36	7.8485	89.894	2.25746	0.0417849	0.260651	0.0370439	0.0704299	1.88654	1.27021	0.530071	0.787273	-2.61386	-0.374506	-0.44098	-0.164201	3.05485	0.538706
3000	854	5	61744.5	117341	9022.56	105444	2875.01	248.484	7.68915	89.8607	2.45012	0.0453162	0.26297	0.0335126	0.0681113	1.73953	1.25901	0.574868	0.794276	-2.65896	-0.458611	-0.143674	0.166803	2.80264	0.291817
3100	888	5	62206.8	118016	9022.56	106368	2624.82	249.413	7.64521	90.1307	2.22413	0.044259	0.264265	0.0345698	0.066816	1.78108	1.25284	0.561457	0.798188	-2.72279	-0.420333	0.243922	-0.0266338	2.47888	0.446979
3200	918	5	62619	119274	9022.56	107193	3058.86	250.238	7.56454	89.8709	2.56455	0.0454905	0.26479	0.0333383	0.066291	1.73286	1.25035	0.57708	0.799774	-2.73295	-0.462871	0.476577	0.276555	2.25637	0.186306
3300	945	5	64054.1	122519	9022.56	110063	3433.03	253.089	7.36422	89.8337	2.80205	0.0439042	0.26421	0.0349246	0.0668716	1.79547	1.2531	0.556956	0.798021	-2.5633	-0.359488	-0.24428	-0.504791	2.80756	0.864277
3400	974	4	64394.4	121737	9022.56	110744	1970.4	253.761	7.41154	90.9699	1.61858	0.0437094	0.26309	0.0351194	0.0679914	1.80348	1.25843	0.554485	0.794638	-2.50516	-0.361721	-0.639341	-0.466725	3.1445	0.828437
3500	997	4	65837.8	124990	9022.56	113630	2337.4	256.589	7.2186	90.9113	1.87006	0.0435618	0.262091	0.035267	0.0689899	1.80958	1.26323	0.552613	0.791622	-2.46507	-0.349365	-0.0367604	-0.462318	2.50184	0.811688
3600	1025	4	66416.1	125489	9022.56	114787	1679.56	257.713	7.18991	91.4717	1.33841	0.0438245	0.264165	0.0350043	0.0669159	1.79874	1.25331	0.555945	0.797887	-2.51248	-0.356051	-0.0418144	-0.41441	2.55428	0.770457
3700	1058	4	66763.3	125921	9022.56	115482	1416.67	258.386	7.16526	91.7097	1.12505	0.0436188	0.26543	0.0352101	0.0656509	1.80722	1.24734	0.553335	0.801707	-2.54121	-0.354867	-0.0212441	-0.367201	2.56245	0.722075
3800	1083	4	67003.8	126236	9022.56	115962	1250.71	258.851	7.14739	91.8618	0.99077	0.0436929	0.26602	0.0351359	0.0650607	1.80416	1.24457	0.554276	0.80349	-2.59526	-0.357456	0.429686	-0.337119	2.16557	0.694563
3900	1118	4	67769.9	127259	9022.56	117495	741.788	260.327	7.08991	92.3272	0.582896	0.043424	0.2691	0.0354048	0.0619814	1.81533	1.23033	0.550865	0.812791	-2.63969	-0.372114	0.211966	-0.0407676	2.42773	0.412889
4000	1149	4	68475.5	128993	9022.56	118906	1064.14	261.678	6.99463	92.1804	0.824964	0.0436514	0.264098	0.0351774	0.066983	1.80587	1.25363	0.55375	0.797684	-2.33765	-0.371222	-1.06684	-0.0321334	3.40448	0.403361
4100	1180	4	70701.6	133910	9022.56	123358	1529.72	265.898	6.73776	92.1199	1.14235	0.0431665	0.27039	0.0356624	0.0606912	1.82616	1.22446	0.547597	0.816688	-2.50931	-0.352321	-0.0559549	0.0136578	2.56527	0.338659
4200	1199	4	71528.6	135522	9022.56	125012	1487.59	267.448	6.65762	92.2447	1.09767	0.0429266	0.268117	0.0359023	0.0629644	1.83636	1.23484	0.544554	0.809822	-2.45928	-0.341795	0.427316	-0.0186584	2.03197	0.360451
4300	1230	4	72019.4	136416	9022.56	125994	1399.44	268.364	6.61402	92.3601	1.02587	0.0427652	0.267325	0.0360636	0.0637562	1.84329	1.2385	0.542507	0.80743	-2.42044	-0.336283	0.428861	-0.0272099	1.99157	0.363493
4400	1258	4	72651.4	137141	9022.56	127258	860.803	269.539	6.57903	92.7933	0.627676	0.0426546	0.269188	0.0361742	0.0618928	1.84807	1.22992	0.541105	0.813059	-2.43699	-0.33116	0.222927	-0.0478901	2.21407	0.379055
4500	1289	4	73074.9	137985	9022.56	128105	857.811	270.324	6.53879	92.8395	0.621669	0.0435163	0.270718	0.0353126	0.0603632	1.81148	1.22297	0.552035	0.817679	-2.46766	-0.347161	0.287343	0.0231835	2.18032	0.323968
4600	1322	4	73528.1	138555	9022.56	129011	521.382	271.161	6.51189	93.1118	0.376299	0.0430452	0.272221	0.0357837	0.0588598	1.83131	1.21622	0.546059	0.822219	-2.47818	-0.336926	0.0838528	0.00221451	2.39431	0.334703
4700	1352	4	73986.4	139396	9022.56	129928	445.716	272.004	6.4726	93.2076	0.319748	0.0432948	0.271997	0.035534	0.0590837	1.82075	1.21722	0.549226	0.821543	-2.46446	-0.3392	0.179858	0.0117609	2.28459	0.327432
4800	1382	4	74306.8	139937	9022.56	130568	346.33	272.593	6.44757	93.3049	0.24749	0.0432149	0.27186	0.035614	0.0592215	1.82411	1.21784	0.548212	0.821127	-2.44858	-0.337039	0.160518	0.0185695	2.28805	0.318472
4900	1414	4	74985.6	141159	9022.56	131926	210.856	273.835	6.39175	93.4589	0.149375	0.0437871	0.271994	0.0350418	0.0590869	1.80028	1.21724	0.55547	0.821534	-2.42309	-0.342504	0.0938669	0.0184841	2.32922	0.324028
5000	1440	4	75382.5	141957	9022.56	132720	214.818	274.559	6.35582	93.4929	0.151325	0.0431545	0.271815	0.0356744	0.059266	1.82667	1.21804	0.547445	0.820993	-2.40466	-0.328768	0.105272	-0.0150714	2.2994	0.343832
5100	1461	4	75731.7	142635	9022.56	133418	194.025	275.194	6.32563	93.5383	0.13603	0.0430808	0.27214	0.0357481	0.0589411	1.82979	1.21658	0.54651	0.821974	-2.40034	-0.327826	0.100721	0.0121523	2.29963	0.315669
5200	1489	4	76167.8	143409	9022.56	134291	95.398	275.985	6.29151	93.642	0.0665218	0.0429963	0.272086	0.0358325	0.0589956	1.83339	1.21683	0.545439	0.821809	-2.3813	-0.324503	0.0605453	0.0093711	2.32075	0.31512
5300	1517	4	77249.9	145652	9022.56	136455	174.685	277.939	6.1946	93.6855	0.119934	0.0425279	0.269986	0.036301	0.0610948	1.85358	1.22629	0.539496	0.815469	-2.28702	-0.311966	0.0419005	0.00236015	2.24512	0.309605
5400	1547	4	77777.1	146607	9022.56	137509	75.7297	278.885	6.15423	93.7941	0.0516548	0.0425343	0.268869	0.0362945	0.0622126	1.8533	1.23139	0.539578	0.812093	-2.24233	-0.309993	0.0350402	0.00398889	2.2073	0.306018
5500	1576	4	78131.8	147374	9022.56	138218	132.954	279.521	6.12222	93.7876	0.0902153	0.0429078	0.269322	0.035921	0.0617586	1.83717	1.22931	0.544316	0.813464	-2.24548	-0.315071	0.087833	0.0262875	2.15766	0.288784
5600	1603	4	78617.3	148504	9022.56	139190	292.302	280.388	6.07561	93.7276	0.19683	0.0444847	0.270257	0.0343441	0.0608236	1.77204	1.22506	0.56432	0.816288	-2.25908	-0.34116	0.193054	0.122088	2.06604	0.219073
5700	1635	4	78973.3	149256	9022.56	139902	331.832	281.022	6.04502	93.7326	0.222324	0.043666	0.269017	0.0351628	0.0620638	1.80527	1.23071	0.553934	0.812542	-2.19675	-0.317597	-0.0452545	-0.0366739	2.242	0.354272
5800	1656	4	79482.8	150013	9022.56	140921	70.1571	281.927	6.01451	93.9387	0.0467673	0.0457071	0.269482	0.0331218	0.0615994	1.72465	1.22858	0.579827	0.813945	-2.20335	-0.347248	0.0467673	0.00334938	2.15659	0.343907
5900	1678	4	80463.1	152030	9022.56	142881	126.186	283.66	5.93473	93.9823	0.0830012	0.044012	0.267957	0.0348168	0.063124	1.79107	1.23558	0.558324	0.80934	-2.13842	-0.321067	0.0830012	0.0404418	2.05541	0.280624
6000	1701	4	80775.3	152650	9022.56	143505	122.44	284.21	5.9106	94.0092	0.0802095	0.0440838	0.267293	0.034745	0.0637884	1.78816	1.23865	0.559234	0.807333	-2.11024	-0.318847	0.0445383	0.0110804	2.06569	0.307775
6100	1725	4	81254.4	153736	9022.56	144464	249.834	285.052	5.86886	93.9686	0.162509	0.0440474	0.268427	0.0347814	0.062654	1.78964	1.23341	0.558773	0.810759	-2.13048	-0.315344	0.162509	0.000800729	1.96796	0.314543
6200	1748	4	81563.4	154374	9022.56	145082	269.543	285.593	5.84462	93.9808	0.174604	0.0441818	0.267826	0.0346471	0.0632555	1.78419	1.23618	0.560477	0.808943	-2.10788	-0.315812	0.174604	0.000906581	1.93327	0.314906
6300	1772	4	82133.6	155414	9022.56	146222	168.989	286.59	5.80551	94.0858	0.108735	0.0441415	0.270027	0.0346873	0.0610542	1.78582	1.2261	0.559967	0.815591	-2.13888	-0.313178	0.108735	0.00351014	2.03014	0.30967
6400	1793	4	82217.2	155564	9022.56	146389	152.506	286.735	5.79989	94.1021	0.0980342	0.0439276	0.269429	0.0349013	0.0616526	1.79452	1.22883	0.557253	0.813784	-2.12176	-0.309953	0.0980342	0.00353991	2.02372	0.306419
6500	1821	4	82465	156007	9022.56	146885	99.6226	287.167	5.78343	94.1527	0.0638577	0.044006	0.269881	0.0348229	0.0612005	1.79132	1.22677	0.558247	0.81515	-2.12309	-0.310152	0.0638577	0.00476398	2.05923	0.305381
6600	1852	4	82820.2	156770	9022.56	147595	152.676	287.785	5.75526	94.1474	0.0973881	0.0443282	0.270207	0.0345007	0.0608742	1.7783	1.22529	0.562334	0.816135	-2.12173	-0.314102	0.0904797	0.0245685	2.03126	0.289541
6700	1886	4	83037.2	157193	9022.56	148029	141.608	288.162	5.73978	94.1701	0.0900855	0.0446213	0.270553	0.0342075	0.0605283	1.76662	1.22372	0.566053	0.81718	-2.12318	-0.316558	0.0849123	0.0148383	2.03827	0.301716
6800	1915	4	83562.3	158198	9022.56	149079	96.2223	289.071	5.70332	94.2359	0.0608239	0.0443016	0.271508	0.0345272	0.0595731	1.77937	1.21942	0.561998	0.820065	-2.12887	-0.309272	0.0608239	6.43177e-05	2.06805	0.309207
6900	1941	4	83887.7	158864	9022.56	149730	111.623	289.634	5.67941	94.2503	0.0702629	0.0438853	0.272254	0.0349435	0.0588275	1.79625	1.21608	0.556717	0.822317	-2.1372	-0.303068	0.069233	0.0115878	2.06797	0.291486
7000	1962	4	84025.2	159130	9022.56	150005	101.738	289.871	5.66994	94.2661	0.0639339	0.0440691	0.272506	0.0347598	0.0585755	1.78876	1.21495	0.559048	0.823078	-2.13845	-0.304221	0.0596618	-0.000889862	2.07879	0.305106
7100	1986	4	84192	159400	9022.56	150339	39.0293	290.158	5.66031	94.3152	0.0244851	0.0441746	0.272863	0.0346542	0.0582183	1.78448	1.21336	0.560387	0.824157	-2.14	-0.305156	0.0244851	0.000643312	2.1155	0.3045
7200	2010	4	84346.3	159707	9022.56	150647	36.7726	290.424	5.64945	94.3275	0.0230251	0.0442957	0.272715	0.0345331	0.0583658	1.7796	1.21402	0.561923	0.823711	-2.13207	-0.306059	0.0230251	-0.0006416	2.10904	0.306695
7300	2028	3	86861	167106	9022.56	155677	2407	294.722	5.39929	93.1603	1.4404	0.0577015	0.282921	0.0211273	0.04816	1.36615	1.17022	0.731985	0.854537	-2.37203	-0.548982	1.4293	1.41432	0.942734	-0.865342
7400	2048	3	86974.9	167414	9022.56	155905	2487.2	294.915	5.38936	93.125	1.48565	0.0577659	0.283242	0.0210629	0.0478393	1.36463	1.1689	0.732802	0.855506	-2.37849	-0.552187	1.47456	1.47074	0.90393	-0.918562
7500	2069	3	87241.8	168042	9022.56	156438	2580.52	295.367	5.36924	93.0951	1.53564	0.0581001	0.284223	0.0207287	0.0468584	1.35678	1.16486	0.737042	0.858469	-2.39588	-0.554995	1.52455	1.4785	0.871326	-0.923508
7600	2101	3	87517.5	168632	9022.56	156990	2619.45	295.834	5.35044	93.0962	1.55335	0.0579597	0.285019	0.0208691	0.0460619	1.36006	1.16161	0.73526	0.860874	-2.40777	-0.553587	1.55335	1.52035	0.854401	-0.966763
7700	2132	3	87741.8	169137	9022.56	157439	2675.47	296.212	5.33448	93.0837	1.58184	0.0582982	0.285818	0.0205307	0.0452635	1.35217	1.15837	0.739554	0.863286	-2.42102	-0.556765	1.58184	1.52702	0.839166	-0.97024
7800	2151	3	87835.8	169307	9022.56	157626	2658.08	296.371	5.32911	93.1009	1.56997	0.0582437	0.286067	0.0205852	0.0450143	1.35343	1.15736	0.738863	0.864038	-2.42328	-0.554916	1.56997	1.51809	0.853298	-0.963155
7900	2181	3	88467.5	170596	9022.56	158890	2683.74	297.435	5.28884	93.138	1.57315	0.058328	0.288266	0.0205009	0.0428155	1.35148	1.14853	0.739932	0.87068	-2.45522	-0.551965	1.57315	1.52373	0.882051	-0.971778
8000	2213	3	89020.4	171671	9022.56	159996	2652.42	298.363	5.25573	93.1992	1.54507	0.0580193	0.290442	0.0208095	0.0406389	1.35866	1.13992	0.736017	0.877254	-2.48745	-0.544141	1.54507	1.52112	0.942374	-0.976984
8100	2246	3	89443.4	170045	9022.56	160842	180.792	299.071	5.30598	94.5877	0.10632	0.0598004	0.29181	0.0190284	0.0392714	1.3182	1.13458	0.758611	0.881384	-2.42985	-0.48841	0.10632	0.0888037	2.32351	0.399589
8200	2270	3	89562.8	170263	9022.56	161080	160.111	299.27	5.29919	94.6068	0.0940373	0.0598044	0.291681	0.0190245	0.0393997	1.31811	1.13508	0.758661	0.880997	-2.42253	-0.487089	0.0940373	0.0765456	2.32848	0.410542
8300	2301	3	89791.8	170711	9022.56	161539	150.1	299.653	5.28527	94.6268	0.0879261	0.0596717	0.292437	0.0191571	0.0386444	1.32104	1.13215	0.756978	0.883278	-2.43294	-0.483736	0.0879261	0.0716783	2.345	0.41205
8400	2319	3	90500.5	172371	9022.56	162956	392.337	300.833	5.23439	94.538	0.227612	0.0595676	0.292017	0.0192612	0.0390638	1.32335	1.13377	0.755658	0.882012	-2.40901	-0.478368	0.227612	0.086296	2.18139	0.392072
8500	2349	3	90614.2	172507	9022.56	163183	301.504	301.022	5.23025	94.595	0.174778	0.0599025	0.292398	0.0189264	0.0386832	1.31595	1.1323	0.759905	0.883161	-2.41167	-0.479866	0.174778	0.0445433	2.23689	0.435331
8600	2380	3	90814.5	172825	9022.56	163584	218.73	301.354	5.22062	94.6528	0.126561	0.0596879	0.292596	0.0191409	0.0384852	1.32068	1.13153	0.757184	0.883759	-2.40774	-0.474617	0.126561	0.0172587	2.28118	0.457361
8700	2405	3	90956.1	173139	9022.56	163867	249.858	301.589	5.21115	94.6446	0.14431	0.0596641	0.292961	0.0191647	0.0381204	1.32121	1.13012	0.756882	0.884861	-2.4129	-0.473298	0.14431	0.0153039	2.26859	0.458006
8800	2426	3	91025.4	173072	9022.56	164006	43.3166	301.704	5.21319	94.7618	0.0250281	0.0596911	0.293175	0.0191377	0.0379064	1.32061	1.1293	0.757224	0.885507	-2.40957	-0.47293	0.0250281	-0.000120155	2.38455	0.473064
8900	2443	3	91126.6	173270	9022.56	164208	39.8673	301.872	5.20721	94.7698	0.0230087	0.0597491	0.29341	0.0190798	0.0376709	1.31933	1.12839	0.757959	0.886219	-2.41191	-0.472984	0.0230087	-0.00211332	2.38891	0.475111
9000	2472	3	91397.9	173776	9022.56	164751	2.71019	302.321	5.19206	94.8064	0.00155959	0.0600372	0.294224	0.0187916	0.0368568	1.313	1.12527	0.761615	0.888678	-2.42159	-0.475408	0.00155959	0.00155951	2.42002	0.473843
9100	2486	3	91424.5	173829	9022.56	164804	2.71019	302.365	5.19047	94.808	0.00155911	0.0599585	0.294246	0.0188703	0.0368352	1.31472	1.12519	0.760616	0.888743	-2.42129	-0.474251	0.00155911	0.00155904	2.41972	0.472688
9200	2507	3	91709.5	174396	9022.56	165374	0.000279	302.836	5.17359	94.8264	1.5998e-07	0.0598263	0.29427	0.0190025	0.0368113	1.31763	1.12509	0.75894	0.888815	-2.41328	-0.47086	1.5998e-07	8.62835e-08	2.41327	0.470859
9300	2532	3	91886.6	174751	9022.56	165728	0.000279	303.128	5.16311	94.8369	1.59656e-07	0.0600401	0.294387	0.0187887	0.0366939	1.31294	1.12465	0.761651	0.889169	-2.41075	-0.472562	1.59656e-07	8.6074e-08	2.41073	0.472563
9400	2551	3	92137.6	175253	9022.56	166230	0.000279	303.542	5.14831	94.8517	1.59199e-07	0.0599895	0.293905	0.0188394	0.0371761	1.31404	1.12649	0.761009	0.887713	-2.39226	-0.470496	1.59199e-07	8.58367e-08	2.39225	0.470503
9500	2571	2	93974.6	181595	9022.56	169904	2668.28	306.553	4.96851	93.5621	1.46936	0.0632001	0.300817	0.0156287	0.0302639	1.24729	1.10061	0.801739	0.908591	-2.57153	-0.530581	1.46936	0.680551	1.10216	-0.149972
9600	2591	2	94193.7	182036	9022.56	170342	2671.33	306.91	4.95646	93.5761	1.46747	0.0631255	0.301328	0.0157033	0.0297529	1.24876	1.09874	0.800792	0.910134	-2.57655	-0.528261	1.46747	0.679698	1.10906	-0.151447
9700	2605	2	94238.7	182127	9022.56	170432	2672.55	306.983	4.95398	93.5786	1.46741	0.0631767	0.301346	0.0156521	0.0297347	1.24775	1.09867	0.801442	0.910189	-2.57558	-0.528629	1.46741	0.679939	1.10816	-0.151326
9800	2628	2	95006.8	183729	9022.56	171969	2737.74	308.232	4.9108	93.5991	1.4901	0.0642563	0.301067	0.0145725	0.0300143	1.22679	1.09969	0.815137	0.909345	-2.54693	-0.537809	1.4901	0.693804	1.05682	-0.156014
9900	2642	2	95054.5	183825	9022.56	172064	2738.16	308.309	4.90824	93.6022	1.48955	0.0633667	0.30122	0.0154621	0.029861	1.24401	1.09913	0.803852	0.909808	-2.54898	-0.526373	1.48955	0.689494	1.05943	-0.163135
10000	2658	2	95317.6	183281	9022.56	172590	1668.56	308.736	4.92279	94.1668	0.910382	0.0636618	0.30125	0.015167	0.0298311	1.23824	1.09902	0.807595	0.909898	-2.513	-0.510369	0.910382	0.30729	1.60261	0.203079
10100	2672	2	95338.9	183324	9022.56	172633	1668.56	308.77	4.92165	94.1682	0.910171	0.0633405	0.301328	0.0154884	0.029753	1.24453	1.09874	0.803519	0.910134	-2.51414	-0.506334	0.910171	0.307653	1.60397	0.198687
10200	2690	2	95450	183569	9022.56	172855	1691.58	308.95	4.91507	94.1634	0.921493	0.0635535	0.301728	0.0152753	0.0293535	1.24035	1.09728	0.806222	0.91134	-2.52055	-0.508872	0.921493	0.319424	1.59906	0.189461
10300	2710	2	95548.7	183770	9022.56	173052	1695.19	309.11	4.9097	94.1679	0.922451	0.0635513	0.301708	0.0152776	0.0293728	1.2404	1.09735	0.806193	0.911282	-2.51724	-0.508269	0.922451	0.319589	1.59479	0.188689
10400	2722	2	95606.7	183887	9022.56	173168	1696.47	309.203	4.90657	94.1709	0.92256	0.0636004	0.30179	0.0152284	0.029291	1.23944	1.09706	0.806817	0.911529	-2.5174	-0.508523	0.92256	0.31948	1.59482	0.189048
10500	2727	2	96050.8	184806	9022.56	174057	1726.95	309.921	4.88218	94.1834	0.934469	0.0633058	0.300327	0.015523	0.0307539	1.24521	1.1024	0.80308	0.907111	-2.4718	-0.502441	0.934469	0.322052	1.53732	0.180396
10600	2736	2	96074.4	183280	9022.56	174104	154.213	309.959	4.92281	94.9931	0.0841405	0.063321	0.300352	0.0155078	0.0307287	1.24491	1.10231	0.803272	0.907187	-2.42979	-0.489788	0.0841405	0.0107168	2.34565	0.47908
10700	2750	2	96102.1	183314	9022.56	174159	132.382	310.003	4.92191	95.0059	0.0722162	0.063338	0.300437	0.0154908	0.0306437	1.24457	1.102	0.803488	0.907444	-2.43034	-0.489246	0.0722162	-0.00132033	2.35812	0.490572
10800	2764	2	96216.9	183550	9022.56	174389	138.424	310.188	4.91559	95.009	0.0754152	0.0632971	0.300382	0.0155318	0.0306991	1.24538	1.1022	0.802968	0.907276	-2.42599	-0.488214	0.0754152	0.000996948	2.35057	0.487222
10900	2773	2	96249.2	183612	9022.56	174453	136.338	310.241	4.91392	95.0118	0.0742534	0.0633573	0.300498	0.0154715	0.0305826	1.24419	1.10177	0.803733	0.907628	-2.42764	-0.488926	0.0742534	0.00385063	2.35338	0.48508
11000	2779	2	96290.8	183704	9022.56	174536	144.758	310.308	4.91147	95.0097	0.0787997	0.0634388	0.300645	0.01539	0.0304359	1.2426	1.10124	0.804767	0.908071	-2.43	-0.489919	0.0787997	0.00860974	2.35119	0.481316
11100	2785	2	96311.6	183745	9022.56	174578	144.022	310.341	4.91038	95.0113	0.0783813	0.0633897	0.300718	0.0154391	0.0303627	1.24356	1.10097	0.804143	0.908292	-2.43103	-0.489198	0.0783813	0.0084504	2.35265	0.480753
11200	2802	2	96562.5	184138	9022.56	175080	35.9165	310.745	4.89988	95.0806	0.0195052	0.0645407	0.301624	0.0142881	0.0294576	1.22138	1.09766	0.818745	0.911026	-2.44145	-0.502441	0.0195052	0.0153745	2.42193	0.487068
11300	2811	2	96589.5	184194	9022.56	175134	37.538	310.789	4.8984	95.0812	0.0203796	0.0646637	0.301721	0.0141652	0.0293597	1.21906	1.09731	0.820305	0.911322	-2.44293	-0.503826	0.0203796	0.0162533	2.42253	0.487569
11400	2819	2	96719.2	184469	9022.56	175393	53.3206	310.997	4.89109	95.08	0.0289049	0.0647697	0.30219	0.0140591	0.0288914	1.21706	1.09561	0.82165	0.912736	-2.45024	-0.504756	0.0289049	0.0241977	2.42131	0.480549
11500	2829	2	96846.5	184709	9022.56	175648	38.84	311.202	4.88473	95.0942	0.0210276	0.0650859	0.302579	0.0137429	0.0285025	1.21115	1.0942	0.825661	0.913911	-2.45501	-0.507498	0.0210276	0.0166231	2.43398	0.490876
11600	2837	2	97028.4	185062	9022.56	176012	28.245	311.494	4.87541	95.1093	0.0152624	0.0650093	0.303106	0.0138196	0.0279754	1.21258	1.0923	0.824689	0.915503	-2.46147	-0.505239	0.0152624	0.0108674	2.44621	0.494378
11700	2850	2	97287.6	185761	9022.56	176530	208.696	311.91	4.85707	95.0306	0.112347	0.0661897	0.304014	0.0126391	0.0270667	1.19095	1.08903	0.839663	0.918247	-2.47935	-0.52278	0.112347	0.107952	2.36699	0.414832
11800	2859	2	97323.1	185824	9022.56	176601	199.876	311.966	4.85544	95.037	0.107562	0.0662463	0.304027	0.0125826	0.0270538	1.18994	1.08898	0.840381	0.918286	-2.4784	-0.522939	0.107562	0.101585	2.37083	0.421354
11900	2866	2	97366.3	185902	9022.56	176687	192.31	312.036	4.85339	95.0432	0.103447	0.0663645	0.304182	0.0124643	0.0268995	1.18782	1.08843	0.841881	0.918753	-2.48045	-0.524023	0.103447	0.0994072	2.377	0.424616
12000	2878	2	97543	186274	9022.56	177041	210.934	312.319	4.84369	95.0431	0.113238	0.0664844	0.30476	0.0123445	0.026321	1.18567	1.08637	0.843402	0.9205	-2.48897	-0.524919	0.113238	0.109475	2.37573	0.415437
12100	2893	2	97650.5	186486	9022.56	177256	207.171	312.491	4.83821	95.0507	0.111092	0.0664996	0.305063	0.0123293	0.0260182	1.1854	1.08529	0.843595	0.921415	-2.49264	-0.524477	0.111092	0.109457	2.38154	0.415011
12200	2902	2	97697.2	186563	9022.56	177349	191.157	312.566	4.8362	95.0613	0.102462	0.0666079	0.305223	0.0122209	0.0258582	1.18348	1.08472	0.844969	0.921898	-2.49451	-0.525094	0.102462	0.100827	2.39204	0.424259
12300	2913	2	97949.7	187067	9022.56	177854	190.513	312.969	4.82316	95.075	0.101842	0.0665018	0.306119	0.0123271	0.0249623	1.18536	1.08154	0.843622	0.924604	-2.50755	-0.522221	0.101842	0.0988737	2.4057	0.42334
12400	2925	2	97989.7	187139	9022.56	177934	181.741	313.033	4.82132	95.0816	0.0971159	0.0664857	0.306261	0.0123431	0.0248205	1.18565	1.08104	0.843419	0.925032	-2.50938	-0.521724	0.0971159	0.0971159	2.41226	0.424599
12500	2933	2	98430.5	188007	9022.56	178816	168.33	313.736	4.79906	95.1114	0.0895342	0.0662631	0.307816	0.0125657	0.0232655	1.18963	1.07558	0.840595	0.929729	-2.53165	-0.516117	0.0895342	0.0895342	2.44211	0.42658
12600	2941	2	98454.5	188055	9022.56	178864	168.33	313.775	4.79784	95.1127	0.0895114	0.0663163	0.3079	0.0125125	0.0231812	1.18868	1.07529	0.84127	0.929983	-2.53287	-0.516616	0.0895114	0.0895114	2.44336	0.427101
12700	2951	2	98679.4	188345	9022.56	179314	8.83143	314.133	4.79044	95.2049	0.00468896	0.0670474	0.308689	0.0117815	0.022392	1.17572	1.07254	0.850544	0.932367	-2.54027	-0.52001	0.00468896	0.00468896	2.53557	0.515315
12800	2965	2	98829.1	188644	9022.56	179613	8.51693	314.371	4.78284	95.2126	0.00451481	0.0668819	0.309213	0.0119469	0.021868	1.17863	1.07072	0.848444	0.93395	-2.54786	-0.517154	0.00451481	0.00451481	2.54335	0.512635
12900	2975	2	98859	188706	9022.56	179673	10.5454	314.418	4.78128	95.2131	0.00558826	0.0668999	0.309317	0.0119289	0.0217638	1.17831	1.07036	0.848673	0.934264	-2.54943	-0.517249	0.00558826	0.00558826	2.54384	0.511655
13000	2989	2	98964.9	188907	9022.56	179885	0.140672	314.587	4.77618	95.2238	7.44662e-05	0.0670391	0.309552	0.0117897	0.0215286	1.17586	1.06955	0.850439	0.934975	-2.55146	-0.518039	7.44662e-05	7.44662e-05	2.55139	0.517963
13100	3002	2	99073.1	189136	9022.56	180101	12.5072	314.759	4.7704	95.223	0.00661277	0.0672282	0.30993	0.0116006	0.0211514	1.17256	1.06825	0.852838	0.936114	-2.55724	-0.519639	0.00661277	6.17389e-05	2.55062	0.519574
13200	3015	2	99191.6	189373	9022.56	180338	12.5072	314.947	4.76443	95.229	0.0066045	0.0672608	0.310342	0.011568	0.0207393	1.17199	1.06683	0.853251	0.937359	-2.5632	-0.519347	0.0066045	8.02685e-05	2.5566	0.519261
13300	3032	2	99488.3	189967	9022.56	180932	12.8726	315.418	4.74954	95.2437	0.00677622	0.0673944	0.311371	0.0114345	0.01971	1.16967	1.0633	0.854946	0.940468	-2.5781	-0.519231	0.00677622	9.79425e-05	2.57132	0.519126
13400	3040	2	99519	190028	9022.56	180993	12.3665	315.466	4.74802	95.2455	0.00650773	0.0673857	0.311477	0.0114431	0.0196039	1.16982	1.06294	0.854836	0.940788	-2.57962	-0.518953	0.00650773	0.00010418	2.57311	0.518841
13500	3051	2	99589.7	190169	9022.56	181134	12.3843	315.578	4.74449	95.249	0.00651225	0.0673676	0.311722	0.0114613	0.0193593	1.17013	1.0621	0.854606	0.941527	-2.58315	-0.518333	0.00651225	0.000113754	2.57663	0.518213
13600	3058	2	99748.3	190486	9022.56	181451	12.3665	315.829	4.73659	95.2569	0.00649206	0.0675849	0.312269	0.011244	0.0188122	1.16637	1.06024	0.857362	0.943179	-2.59105	-0.520004	0.00649206	0.000101132	2.58455	0.519896
13700	3067	2	99767.1	190513	9022.56	181489	1.59688	315.859	4.73592	95.2632	0.0008382	0.0673407	0.312334	0.0114882	0.0187472	1.1706	1.06002	0.854265	0.943376	-2.59172	-0.51702	0.0008382	-6.61321e-05	2.59087	0.51708
13800	3074	2	99781.5	190545	9022.56	181518	4.11675	315.882	4.73514	95.2627	0.00216052	0.0673698	0.312384	0.011459	0.0186975	1.17009	1.05985	0.854634	0.943526	-2.5925	-0.517346	0.00216052	0.00125627	2.59033	0.516084
13900	3089	2	99820.4	190621	9022.56	181596	2.95074	315.944	4.73324	95.2652	0.00154796	0.0673704	0.312517	0.0114585	0.0185636	1.17008	1.0594	0.854641	0.94393	-2.5944	-0.517149	0.00154796	0.00154796	2.59285	0.515595
14000	3100	2	99921	190835	9022.56	181797	15.6004	316.103	4.72794	95.2639	0.0081748	0.0674048	0.312863	0.011424	0.0182176	1.16948	1.05823	0.855078	0.944975	-2.5997	-0.517298	0.0081748	0.0081748	2.59152	0.509118
14100	3117	2	99949.7	190890	9022.56	181854	12.7629	316.148	4.72658	95.2667	0.00668602	0.0674595	0.312962	0.0113693	0.0181189	1.16854	1.05789	0.855772	0.945273	-2.60105	-0.517712	0.00668602	0.00668602	2.59436	0.511013
14200	3126	2	100010	190997	9022.56	181975	0.256542	316.243	4.72392	95.2759	0.000134317	0.0674569	0.313169	0.0113719	0.0179123	1.16858	1.0572	0.855739	0.945898	-2.60372	-0.517029	0.000134317	0.000134317	2.60357	0.516888
14300	3132	2	100019	191016	9022.56	181994	0.256542	316.258	4.72345	95.2764	0.000134303	0.0674552	0.313201	0.0113736	0.0178797	1.16861	1.05709	0.855718	0.945996	-2.60419	-0.516955	0.000134303	0.000134303	2.60404	0.516815
14400	3138	2	100035	191048	9022.56	182025	0.448535	316.283	4.72268	95.2771	0.000234777	0.0674456	0.313255	0.0113832	0.0178264	1.16878	1.05691	0.855595	0.946157	-2.60496	-0.516758	0.000234777	0.000234777	2.60472	0.516516
14500	3151	2	100077	191132	9022.56	182110	0.205265	316.35	4.72058	95.2793	0.000107394	0.0675966	0.313401	0.0112322	0.0176803	1.16617	1.05641	0.857511	0.946598	-2.60706	-0.518296	0.000107394	0.000107394	2.60694	0.51818
14600	3161	2	100112	191201	9022.56	182178	0.205265	316.404	4.71889	95.281	0.000107355	0.0676291	0.313518	0.0111997	0.0175628	1.1656	1.05602	0.857924	0.946953	-2.60875	-0.518485	0.000107355	0.000107355	2.60863	0.518369
14700	3169	2	100181	191339	9022.56	182317	0.214763	316.514	4.71547	95.2844	0.000112242	0.0676008	0.313755	0.0112281	0.0173257	1.16609	1.05522	0.857564	0.947669	-2.61217	-0.517757	0.000112242	0.000112242	2.61204	0.517638
14800	3172	2	100191	191360	9022.56	182337	0.214763	316.53	4.71497	95.2849	0.00011223	0.067648	0.31379	0.0111808	0.0172909	1.16528	1.0551	0.858163	0.947774	-2.61267	-0.518257	0.00011223	0.00011223	2.61255	0.518144
14900	3180	2	100238	191454	9022.56	182431	0.0174526	316.604	4.71266	95.2873	9.11583e-06	0.0676504	0.313951	0.0111784	0.0171297	1.16524	1.05456	0.858194	0.948261	-2.61498	-0.518013	9.11583e-06	9.11583e-06	2.61497	0.51801
15000	3190	2	100266	191510	9022.56	182487	1.56e-05	316.648	4.71128	95.2887	8.1458e-09	0.067768	0.314047	0.0110609	0.0170339	1.16322	1.05424	0.859685	0.948551	-2.61636	-0.519241	8.1458e-09	8.1458e-09	2.61636	0.519245
15100	3199	2	100343	191663	9022.56	182641	1.56e-05	316.77	4.7075	95.2925	8.13927e-09	0.0680801	0.31431	0.0107487	0.0167711	1.15788	1.05336	0.863645	0.949344	-2.62014	-0.522488	8.13927e-09	8.13927e-09	2.62013	0.522487
15200	3208	2	100439	191855	9022.56	182833	1.56e-05	316.921	4.7028	95.2972	8.13113e-09	0.0684323	0.314637	0.0103966	0.0164438	1.15193	1.05226	0.868112	0.950333	-2.62484	-0.526098	8.13113e-09	8.13113e-09	2.62484	0.526095
15300	3212	2	100451	191880	9022.56	182857	1.56e-05	316.94	4.7022	95.2978	8.1301e-09	0.0684297	0.314679	0.0103991	0.0164022	1.15197	1.05212	0.86808	0.950459	-2.62544	-0.525997	8.1301e-09	8.1301e-09	2.62543	0.525995
15400	3217	2	100453	191883	9022.56	182860	1.56e-05	316.942	4.70212	95.2979	8.12997e-09	0.0684366	0.314684	0.0103922	0.0163971	1.15185	1.05211	0.868167	0.950474	-2.62551	-0.52607	8.12997e-09	8.12997e-09	2.62551	0.526068
15500	3225	2	100567	192112	9022.56	183090	1.56e-05	317.124	4.6965	95.3035	8.12025e-09	0.068969	0.315076	0.00985983	0.0160055	1.14296	1.0508	0.874921	0.951657	-2.63114	-0.531696	8.12025e-09	8.12025e-09	2.63113	0.531694
15600	3226	2	100572	192122	9022.56	183100	1.56e-05	317.132	4.69626	95.3037	8.11983e-09	0.0689921	0.315093	0.00983672	0.0159885	1.14258	1.05074	0.875214	0.951708	-2.63138	-0.53194	8.11983e-09	8.11983e-09	2.63137	0.531938
15700	3231	2	100575	192128	9022.56	183105	1.56e-05	317.136	4.69613	95.3039	8.1196e-09	0.0690004	0.315102	0.00982839	0.0159794	1.14244	1.05071	0.87532	0.951736	-2.63151	-0.532023	8.1196e-09	8.1196e-09	2.6315	0.532021
15800	3237	2	100696	192370	9022.56	183347	1.56e-05	317.327	4.69021	95.3098	8.10937e-09	0.0695607	0.315514	0.00926812	0.0155672	1.13324	1.04934	0.882427	0.952981	-2.63743	-0.537938	8.10937e-09	8.10937e-09	2.63742	0.537937
15900	3243	2	100770	192518	9022.56	183495	1.56e-05	317.443	4.6866	95.3134	8.10314e-09	0.0695162	0.315765	0.00931266	0.0153157	1.13396	1.0485	0.881862	0.95374	-2.64104	-0.536978	8.10314e-09	8.10314e-09	2.64102	0.536972
16000	3247	2	101134	193246	9022.56	184224	1.56e-05	318.016	4.66894	95.3311	8.0726e-09	0.0692775	0.316998	0.00955132	0.0140831	1.13787	1.04443	0.878835	0.957463	-2.65869	-0.532046	8.0726e-09	8.0726e-09	2.65869	0.532045
16100	3248	2	101135	193248	9022.56	184225	1.56e-05	318.018	4.6689	95.3311	8.07253e-09	0.0692818	0.317001	0.00954707	0.0140799	1.1378	1.04442	0.878889	0.957473	-2.65874	-0.532091	8.07253e-09	8.07253e-09	2.65873	0.532089
16200	3248	2	101135	193248	9022.56	184225	1.56e-05	318.018	4.6689	95.3311	8.07253e-09	0.0692818	0.317001	0.00954707	0.0140799	1.1378	1.04442	0.878889	0.957473	-2.65874	-0.532091	8.07253e-09	8.07253e-09	2.65873	0.532089
16300	3251	2	101173	193323	9022.56	184300	1.56e-05	318.077	4.66709	95.3329	8.0694e-09	0.0694541	0.317128	0.00937471	0.0139535	1.13498	1.044	0.881075	0.957855	-2.66055	-0.533901	8.0694e-09	8.0694e-09	2.66054	0.533899
16400	3255	2	101220	193417	9022.56	184394	1.56e-05	318.151	4.66482	95.3352	8.06547e-09	0.0696396	0.317286	0.00918924	0.0137948	1.13195	1.04348	0.883428	0.958334	-2.66282	-0.535809	8.06547e-09	8.06547e-09	2.66281	0.535802
16500	3257	2	101239	193455	9022.56	184432	1.56e-05	318.18	4.66391	95.3361	8.0639e-09	0.0696261	0.31735	0.00920273	0.0137311	1.13217	1.04327	0.883257	0.958527	-2.66373	-0.535541	8.0639e-09	8.0639e-09	2.66372	0.535533
16600	3261	2	101406	193789	9022.56	184766	1.56e-05	318.443	4.65587	95.3441	8.05e-09	0.0700647	0.317913	0.0087641	0.0131686	1.12509	1.04142	0.888821	0.960226	-2.67177	-0.539724	8.05e-09	8.05e-09	2.67176	0.539721
16700	3265	2	101409	193796	9022.56	184774	1.57e-05	318.448	4.65569	95.3443	8.1013e-09	0.0700813	0.317925	0.00874755	0.0131564	1.12482	1.04138	0.889031	0.960262	-2.67194	-0.539897	8.1013e-09	8.1013e-09	2.67194	0.539894
16800	3268	2	101415	193807	9022.56	184784	1.57e-05	318.457	4.65544	95.3446	8.10086e-09	0.0701054	0.317942	0.00872342	0.0131387	1.12443	1.04132	0.889337	0.960316	-2.6722	-0.54015	8.10086e-09	8.10086e-09	2.67219	0.540148
16900	3269	2	101462	193901	9022.56	184878	1.57e-05	318.531	4.65318	95.3468	8.09692e-09	0.0703214	0.318101	0.00850748	0.0129803	1.12098	1.04081	0.892077	0.960794	-2.67446	-0.542412	8.09692e-09	8.09692e-09	2.67445	0.54241
17000	3269	2	101462	193901	9022.56	184878	1.57e-05	318.531	4.65318	95.3468	8.09692e-09	0.0703214	0.318101	0.00850748	0.0129803	1.12098	1.04081	0.892077	0.960794	-2.67446	-0.542412	8.09692e-09	8.09692e-09	2.67445	0.54241
17100	3270	2	101470	193918	9022.56	184896	1.57e-05	318.544	4.65277	95.3472	8.0962e-09	0.0703152	0.31813	0.00851366	0.0129515	1.12108	1.04071	0.891998	0.960881	-2.67487	-0.542289	8.0962e-09	8.0962e-09	2.67486	0.542287
17200	3270	2	101470	193918	9022.56	184896	1.57e-05	318.544	4.65277	95.3472	8.0962e-09	0.0703152	0.31813	0.00851366	0.0129515	1.12108	1.04071	0.891998	0.960881	-2.67487	-0.542289	8.0962e-09	8.0962e-09	2.67486	0.542287
17300	3270	2	101470	193918	9022.56	184896	1.57e-05	318.544	4.65277	95.3472	8.0962e-09	0.0703152	0.31813	0.00851366	0.0129515	1.12108	1.04071	0.891998	0.960881	-2.67487	-0.542289	8.0962e-09	8.0962e-09	2.67486	0.542287
17400	3273	2	101489	193955	9022.56	184932	1.56e-05	318.573	4.65189	95.3481	8.04312e-09	0.070399	0.318191	0.00842978	0.0128899	1.11974	1.04051	0.893062	0.961067	-2.67575	-0.543168	8.04312e-09	8.04312e-09	2.67574	0.543166
17500	3274	2	101490	193956	9022.56	184934	1.56e-05	318.574	4.65185	95.3482	8.04304e-09	0.0703984	0.318194	0.00843041	0.012887	1.11975	1.0405	0.893054	0.961076	-2.67579	-0.543155	8.04304e-09	8.04304e-09	2.67578	0.543153
17600	3275	2	101501	193979	9022.56	184957	1.56e-05	318.592	4.6513	95.3487	8.0421e-09	0.0703902	0.318232	0.00843861	0.0128488	1.11988	1.04038	0.89295	0.961191	-2.67634	-0.542992	8.0421e-09	8.0421e-09	2.67633	0.54299
17700	3276	2	101510	194001	9022.56	184974	4.21871	318.606	4.65078	95.347	0.00217458	0.0704306	0.318262	0.00839825	0.0128192	1.11924	1.04028	0.893462	0.961281	-2.67686	-0.543516	0.00217458	0.00217458	2.67468	0.541339
17800	3276	2	101510	194001	9022.56	184974	4.21871	318.606	4.65078	95.347	0.00217458	0.0704306	0.318262	0.00839825	0.0128192	1.11924	1.04028	0.893462	0.961281	-2.67686	-0.543516	0.00217458	0.00217458	2.67468	0.541339
17900	3276	2	101510	194001	9022.56	184974	4.21871	318.606	4.65078	95.347	0.00217458	0.0704306	0.318262	0.00839825	0.0128192	1.11924	1.04028	0.893462	0.961281	-2.67686	-0.543516	0.00217458	0.00217458	2.67468	0.541339
18000	3277	2	101510	194001	9022.56	184975	4.21871	318.606	4.65077	95.3471	0.00217458	0.0704313	0.318262	0.00839755	0.0128187	1.11923	1.04028	0.893471	0.961282	-2.67687	-0.543523	0.00217458	0.00217458	2.67469	0.541346
18100	3278	2	101519	194015	9022.56	184993	1.56e-05	318.62	4.65044	95.3496	8.04061e-09	0.0704248	0.318293	0.008404	0.0127886	1.11933	1.04018	0.893389	0.961373	-2.6772	-0.543293	8.04061e-09	8.04061e-09	2.67719	0.543292
18200	3281	2	101535	194052	9022.56	185025	4.21871	318.646	4.64956	95.3483	0.00217401	0.0704355	0.318347	0.00839328	0.0127339	1.11916	1.04	0.893525	0.961538	-2.67808	-0.543425	0.00217401	0.00217401	2.6759	0.54125
18300	3281	2	101535	194052	9022.56	185025	4.21871	318.646	4.64956	95.3483	0.00217401	0.0704355	0.318347	0.00839328	0.0127339	1.11916	1.04	0.893525	0.961538	-2.67808	-0.543425	0.00217401	0.00217401	2.6759	0.54125
18400	3283	2	101595	194168	9022.56	185145	1.56e-05	318.74	4.64678	95.3532	8.03429e-09	0.0707104	0.318549	0.00811838	0.0125324	1.11481	1.03934	0.897013	0.962147	-2.68085	-0.546201	8.03429e-09	8.03429e-09	2.68085	0.5462
18500	3283	2	101595	194168	9022.56	185145	1.56e-05	318.74	4.64678	95.3532	8.03429e-09	0.0707104	0.318549	0.00811838	0.0125324	1.11481	1.03934	0.897013	0.962147	-2.68085	-0.546201	8.03429e-09	8.03429e-09	2.68085	0.5462
18600	3285	2	101597	194171	9022.56	185148	1.56e-05	318.742	4.64671	95.3533	8.03416e-09	0.0707177	0.318554	0.00811111	0.012527	1.1147	1.03932	0.897105	0.962163	-2.68093	-0.546277	8.03416e-09	8.03416e-09	2.68092	0.546276
18700	3286	2	101600	194177	9022.56	185154	1.56e-05	318.747	4.64656	95.3534	8.03391e-09	0.0707155	0.318564	0.00811331	0.0125168	1.11473	1.03929	0.897077	0.962194	-2.68108	-0.546233	8.03391e-09	8.03391e-09	2.68107	0.546232
18800	3289	2	101631	194246	9022.56	185218	6.13578	318.797	4.6449	95.3519	0.00315876	0.0708137	0.31867	0.00801515	0.0124107	1.11319	1.03895	0.898322	0.962515	-2.68274	-0.547347	0.00315876	0.00315876	2.67957	0.544187
18900	3290	2	101638	194259	9022.56	185230	6.13578	318.807	4.6446	95.3522	0.00315855	0.0708091	0.318692	0.00801973	0.0123895	1.11326	1.03888	0.898264	0.962579	-2.68304	-0.547256	0.00315855	0.00315855	2.67988	0.544096
19000	3290	2	101638	194259	9022.56	185230	6.13578	318.807	4.6446	95.3522	0.00315855	0.0708091	0.318692	0.00801973	0.0123895	1.11326	1.03888	0.898264	0.962579	-2.68304	-0.547256	0.00315855	0.00315855	2.67988	0.544096
19100	3292	2	101658	194294	9022.56	185272	1.56e-05	318.839	4.64376	95.3562	8.02905e-09	0.0708009	0.318761	0.00802795	0.0123202	1.11339	1.03865	0.89816	0.962788	-2.68388	-0.54689	8.02905e-09	8.02905e-09	2.68388	0.546889
19200	3296	2	101673	194323	9022.56	185300	1.56e-05	318.861	4.64308	95.3569	8.02789e-09	0.0708036	0.318808	0.00802519	0.012273	1.11334	1.0385	0.898195	0.962931	-2.68456	-0.546839	8.02789e-09	8.02789e-09	2.68455	0.546839
19300	3298	2	101676	194329	9022.56	185307	1.56e-05	318.867	4.64292	95.3571	8.0276e-09	0.0708036	0.31882	0.00802526	0.0122614	1.11335	1.03846	0.898194	0.962965	-2.68472	-0.546818	8.0276e-09	8.0276e-09	2.68471	0.546818
19400	3300	2	101677	194331	9022.56	185308	1.56e-05	318.868	4.64288	95.3571	8.02754e-09	0.0708069	0.318822	0.00802192	0.012259	1.11329	1.03845	0.898236	0.962973	-2.68476	-0.546853	8.02754e-09	8.02754e-09	2.68475	0.546852
19500	3303	2	101684	194346	9022.56	185323	0.542255	318.88	4.64251	95.3572	0.000279014	0.0708082	0.318847	0.00802058	0.0122339	1.11327	1.03837	0.898253	0.963049	-2.68513	-0.546838	0.000279014	0.000279014	2.68484	0.546558
19600	3307	2	101698	194373	9022.56	185350	1.57e-05	318.901	4.64189	95.3581	8.07727e-09	0.0708693	0.318892	0.00795957	0.0121891	1.11231	1.03822	0.899027	0.963184	-2.68575	-0.547463	8.07727e-09	8.07727e-09	2.68574	0.547462
19700	3310	2	101730	194437	9022.56	185415	1.56e-05	318.951	4.64034	95.3597	8.02316e-09	0.070871	0.319	0.00795788	0.012081	1.11229	1.03787	0.899049	0.96351	-2.68729	-0.547292	8.02316e-09	8.02316e-09	2.68729	0.54729
19800	3311	2	101739	194456	9022.56	185433	1.56e-05	318.966	4.6399	95.3601	8.02238e-09	0.0708642	0.319031	0.00796466	0.0120497	1.11239	1.03777	0.898963	0.963605	-2.68774	-0.547157	8.02238e-09	8.02238e-09	2.68773	0.547155
19900	3317	2	101742	194462	9022.56	185439	1.56e-05	318.97	4.63976	95.3602	8.02214e-09	0.070865	0.319041	0.00796382	0.0120399	1.11238	1.03774	0.898973	0.963634	-2.68788	-0.547149	8.02214e-09	8.02214e-09	2.68787	0.547147
20000	3320	2	101764	194505	9022.56	185482	1.57e-05	319.004	4.63873	95.3613	8.07178e-09	0.0708495	0.319113	0.00797934	0.0119678	1.11262	1.0375	0.898776	0.963852	-2.68891	-0.54684	8.07178e-09	8.07178e-09	2.6889	0.546838
20100	3324	2	101768	194513	9022.56	185491	1.56e-05	319.011	4.63853	95.3615	8.02002e-09	0.0708563	0.319127	0.00797248	0.0119537	1.11252	1.03746	0.898863	0.963895	-2.68911	-0.546895	8.02002e-09	8.02002e-09	2.6891	0.546894
20200	3328	2	101857	194691	9022.56	185669	1.56e-05	319.15	4.63429	95.3657	8.01269e-09	0.0712455	0.319425	0.00758329	0.0116565	1.10644	1.03649	0.9038	0.964793	-2.69334	-0.550939	8.01269e-09	8.01269e-09	2.69334	0.550938
20300	3332	2	101862	194701	9022.56	185678	1.56e-05	319.158	4.63406	95.3659	8.01229e-09	0.0712235	0.319441	0.00760534	0.0116403	1.10678	1.03644	0.903521	0.964841	-2.69358	-0.550651	8.01229e-09	8.01229e-09	2.69357	0.550651
20400	3333	2	101871	194719	9022.56	185697	1.56e-05	319.172	4.63362	95.3664	8.01154e-09	0.0712655	0.319472	0.00756333	0.0116095	1.10613	1.03634	0.904054	0.964934	-2.69401	-0.55109	8.01154e-09	8.01154e-09	2.69401	0.551091
20500	3335	2	101872	194722	9022.56	185699	1.56e-05	319.174	4.63357	95.3664	8.01144e-09	0.0712693	0.319475	0.00755951	0.0116056	1.10607	1.03633	0.904102	0.964946	-2.69407	-0.551128	8.01144e-09	8.01144e-09	2.69406	0.551128
20600	3338	2	101894	194765	9022.56	185742	1.56e-05	319.208	4.63254	95.3675	8.00967e-09	0.0712557	0.319547	0.00757309	0.0115337	1.10628	1.03609	0.90393	0.965163	-2.69509	-0.550841	8.00967e-09	8.00967e-09	2.69509	0.550841
20700	3343	2	101898	194774	9022.56	185751	1.56e-05	319.215	4.63232	95.3677	8.00929e-09	0.0712647	0.319563	0.00756409	0.0115182	1.10614	1.03604	0.904044	0.96521	-2.69532	-0.550919	8.00929e-09	8.00929e-09	2.69531	0.550919
20800	3349	1	102014	195102	9022.56	185982	97.0514	319.396	4.62454	95.3257	0.049744	0.0717738	0.319948	0.00705502	0.0111335	1.0983	1.0348	0.910502	0.966372	-2.7031	-0.558511	0.049744	0.049744	2.65334	0.508762
20900	3350	1	102032	195138	9022.56	186018	97.0514	319.424	4.62369	95.3266	0.0497348	0.0718559	0.320008	0.00697291	0.0110733	1.09704	1.0346	0.911544	0.966554	-2.70395	-0.559366	0.0497348	0.0497348	2.65421	0.509627
21000	3353	1	102036	195051	9022.56	186026	2.67054	319.43	4.62573	95.3729	0.00136915	0.0718742	0.320021	0.0069546	0.0110599	1.09676	1.03456	0.911776	0.966595	-2.70191	-0.55732	0.00136915	0.00136915	2.70053	0.555946

## Sheet: EP_CH
DIST	NL	NC	IICnum	Sum_varIIC	Sum_varIICintra	Sum_varIICflux	Sum_varIICconnector	eciic	thetaiicintra	thetaiicflux	thetaiicconnector
100	15	58	9013.41	9378.65	8662.34	702.133	14.1762	94.939	92.3624	7.48651	0.151154
200	29	47	9222.68	9820.17	8662.34	1120.67	37.1606	96.0348	88.2097	11.4119	0.378411
300	49	34	10389.8	12954.3	8662.34	3454.84	837.108	101.93	66.8685	26.6695	6.46201
400	72	27	11401.7	15161.5	8662.34	5478.78	1020.42	106.779	57.1337	36.1361	6.73029
500	90	22	13013	19156.2	8662.34	8701.27	1792.56	114.074	45.2196	45.4228	9.35759
600	108	17	13293.9	18770.8	8662.34	9263.01	845.402	115.299	46.1481	49.3481	4.50383
700	120	14	15466.4	27915.8	8662.34	13608	5645.46	124.364	31.0302	48.7466	20.2232
800	146	11	17184.5	30583	8662.34	17044.3	4876.33	131.09	28.3241	55.7313	15.9446
900	164	8	18575.7	35142.8	8662.34	19826.6	6653.86	136.293	24.649	56.4173	18.9338
1000	191	8	19786	34535.2	8662.34	22247.3	3625.58	140.663	25.0826	64.4192	10.4982
1100	209	8	19987.3	34568.1	8662.34	22649.9	3255.85	141.376	25.0588	65.5226	9.41865
1200	230	6	23614.3	45428.7	8662.34	29903.9	6862.45	153.669	19.068	65.8261	15.106
1300	249	4	26680.9	52857.3	8662.34	36037.2	8157.73	163.343	16.3882	68.1783	15.4335
1400	265	4	26964	52974	8662.34	36603.3	7708.38	164.207	16.3521	69.0967	14.5512
1500	279	4	27667.3	53963.7	8662.34	38010	7291.42	166.335	16.0522	70.4361	13.5117
1600	301	3	38865.4	95099.5	8662.34	60406.2	26031	197.143	9.10872	63.5189	27.3723
1700	331	3	39200	95243.9	8662.34	61075.3	25506.2	197.99	9.09491	64.1252	26.7799
1800	352	3	39479.4	95693.9	8662.34	61634	25397.6	198.694	9.05213	64.4075	26.5404
1900	389	3	40819.1	93913.8	8662.34	64313.5	20938	202.037	9.22372	68.4814	22.2949
2000	425	3	42683.8	99785.4	8662.34	68043	23080.1	206.601	8.68097	68.1893	23.1297
2100	455	2	46600.9	115756	8662.34	75877	31216.3	215.872	7.4833	65.5493	26.9674
2200	485	2	47603	118569	8662.34	77881.2	32025	218.181	7.30576	65.6845	27.0097
2300	522	2	48736.6	118673	8662.34	80148.4	29861.8	220.764	7.29937	67.5375	25.1632
2400	561	2	49564	117393	8662.34	81803.2	26927	222.63	7.37895	69.6835	22.9376
2500	593	2	50529.5	106935	8662.34	83734.3	14537.9	224.788	8.1006	78.3042	13.5952
2600	614	2	50869.7	107655	8662.34	84414.7	14578.3	225.543	8.04637	78.412	13.5416
2700	643	2	54597.9	104454	8662.34	91871.1	3920.07	233.662	8.29301	87.9541	3.75293
2800	661	2	55081.1	104669	8662.34	92837.6	3169.32	234.694	8.27592	88.6961	3.02794
2900	698	2	55727	105343	8662.34	94129.4	2551.04	236.066	8.22301	89.3553	2.42166
3000	721	2	56275.2	106316	8662.34	95225.8	2427.52	237.224	8.14776	89.5689	2.28332
3100	744	2	56822.2	107399	8662.34	96319.7	2417.3	238.374	8.06554	89.6837	2.25076
3200	763	2	57051.5	107910	8662.34	96778.3	2468.97	238.855	8.02741	89.6846	2.288
3300	787	2	58553.1	112153	8662.34	99781.6	3708.7	241.978	7.72371	88.9694	3.30684
3400	811	2	58888.2	111438	8662.34	100452	2323.81	242.669	7.77326	90.1414	2.0853
3500	829	2	60226.7	114461	8662.34	103129	2669.66	245.411	7.56797	90.0997	2.33238
3600	847	2	60722.3	114794	8662.34	104120	2012.14	246.419	7.54596	90.7012	1.75282
3700	865	2	61066.1	115189	8662.34	104807	1718.9	247.116	7.52013	90.9876	1.49225
3800	887	2	61276.5	115423	8662.34	105228	1532.69	247.541	7.50484	91.1673	1.32789
3900	909	2	62012	116086	8662.34	106699	723.984	249.022	7.46203	91.9143	0.623664
4000	933	2	62627.9	117601	8662.34	107931	1007.96	250.256	7.36585	91.777	0.857098
4100	958	2	64729.5	122176	8662.34	112134	1378.98	254.42	7.09008	91.7812	1.12869
4200	976	2	65519.4	123758	8662.34	113714	1381.55	255.968	6.99942	91.8843	1.11633
4300	999	2	65991.3	124633	8662.34	114658	1312.48	256.888	6.9503	91.9966	1.05308
4400	1017	2	66585.8	125356	8662.34	115847	846.864	258.042	6.91019	92.4142	0.675567
4500	1036	2	66853.4	125797	8662.34	116382	752.879	258.56	6.88595	92.5156	0.598486
4600	1063	2	67334.3	126479	8662.34	117344	473.14	259.489	6.84882	92.7771	0.374085
4700	1080	2	67718.7	127167	8662.34	118113	391.657	260.228	6.8118	92.8802	0.307987
4800	1103	2	68023.2	127676	8662.34	118722	292.277	260.813	6.78461	92.9865	0.22892
4900	1129	2	68562.5	128631	8662.34	119800	168.366	261.844	6.73425	93.1348	0.13089
5000	1150	2	69016.7	129587	8662.34	120709	215.628	262.71	6.68459	93.149	0.166397
5100	1166	2	69347.1	130193	8662.34	121369	161.28	263.338	6.65346	93.2227	0.123877
5200	1187	2	69758.8	130930	8662.34	122193	74.8275	264.119	6.61601	93.3268	0.0571507
5300	1207	2	70819	133132	8662.34	124313	156.528	266.118	6.50657	93.3759	0.117573
5400	1229	2	71301.4	134004	8662.34	125278	63.8744	267.023	6.46422	93.4881	0.0476659
5500	1251	2	71570.7	134565	8662.34	125817	86.0245	267.527	6.43729	93.4988	0.0639278
5600	1269	2	71778.4	134995	8662.34	126232	100.899	267.915	6.41677	93.5085	0.0747423
5700	1293	2	72227	136144	8662.34	127129	352.611	268.751	6.36262	93.3784	0.258998
5800	1308	2	72383	136163	8662.34	127441	59.119	269.041	6.36175	93.5948	0.0434179
5900	1325	2	73536.3	138469	8662.34	129748	58.9315	271.176	6.2558	93.7016	0.0425593
6000	1342	2	73810.5	139055	8662.34	130296	96.1274	271.681	6.22945	93.7014	0.0691291
6100	1362	2	74254	140072	8662.34	131183	226.508	272.496	6.1842	93.6541	0.161708
6200	1380	2	74515.3	140613	8662.34	131706	244.24	272.975	6.16043	93.6659	0.173697
6300	1394	2	75042.7	141572	8662.34	132761	148.969	273.939	6.11869	93.7761	0.105225
6400	1413	2	75152.6	141777	8662.34	132981	133.971	274.14	6.10984	93.7957	0.0944943
6500	1436	2	75366.8	142155	8662.34	133409	84.0049	274.53	6.09358	93.8473	0.0590937
6600	1461	2	75640.4	142722	8662.34	133956	103.93	275.028	6.06937	93.8578	0.0728195
6700	1487	2	75792.1	143029	8662.34	134259	107.626	275.304	6.05634	93.8684	0.0752472
6800	1509	2	76322.4	144070	8662.34	135320	87.5363	276.265	6.01259	93.9266	0.0607596
6900	1532	2	76686.4	144795	8662.34	136048	84.9589	276.923	5.98247	93.9588	0.0586752
7000	1549	2	76782.5	144997	8662.34	136240	93.9924	277.097	5.97417	93.961	0.0648238
7100	1569	2	76917.9	145208	8662.34	136511	34.6202	277.341	5.96547	94.0107	0.0238418
7200	1586	2	77039.4	145451	8662.34	136754	34.4234	277.56	5.95551	94.0208	0.0236667
7300	1600	2	77126.1	145628	8662.34	136928	37.9894	277.716	5.94827	94.0256	0.0260866
7400	1617	2	77216.7	145793	8662.34	137109	21.7386	277.879	5.94154	94.0435	0.0149106
7500	1633	2	77398.7	146219	8662.34	137473	83.5494	278.206	5.92424	94.0186	0.05714
7600	1659	2	77666.6	146719	8662.34	138008	48.4227	278.687	5.90403	94.063	0.0330037
7700	1682	2	77809.6	147038	8662.34	138295	80.6124	278.944	5.89125	94.0539	0.0548243
7800	1699	2	77902	147218	8662.34	138479	76.3874	279.109	5.88402	94.0641	0.0518872
7900	1722	2	78448.2	148307	8662.34	139572	73.2906	280.086	5.8408	94.1098	0.049418
8000	1750	2	78990.3	149354	8662.34	140656	35.7614	281.052	5.79987	94.1762	0.023944
8100	1779	2	79065.8	149495	8662.34	140807	26.186	281.186	5.79439	94.1881	0.0175163
8200	1801	2	79170.6	149705	8662.34	141017	26.186	281.373	5.78627	94.1962	0.0174917
8300	1829	2	79395.5	150153	8662.34	141466	24.3966	281.772	5.76901	94.2147	0.0162478
8400	1841	2	80039.8	151632	8662.34	142755	214.28	282.913	5.71276	94.1459	0.141316
8500	1865	2	80083.3	151702	8662.34	142842	197.568	282.99	5.71011	94.1597	0.130234
8600	1891	2	80297	152098	8662.34	143269	166.247	283.367	5.69524	94.1955	0.109302
8700	1912	2	80426.2	152387	8662.34	143528	196.589	283.595	5.68445	94.1865	0.129007
8800	1929	2	80482.9	152342	8662.34	143641	38.3113	283.695	5.68612	94.2887	0.0251483
8900	1942	2	80562.4	152501	8662.34	143800	38.3113	283.835	5.68019	94.2947	0.025122
9000	1965	2	80752.8	152843	8662.34	144181	0.0001131	284.17	5.66747	94.3325	7.39974e-08
9100	1978	2	80789.8	152917	8662.34	144255	0.0001131	284.236	5.66472	94.3353	7.39615e-08
9200	1992	2	81064.5	153467	8662.34	144804	0.0001131	284.718	5.64445	94.3556	7.36968e-08
9300	2008	2	81184	153706	8662.34	145043	0.0001131	284.928	5.63567	94.3643	7.35822e-08
9400	2023	2	81414.6	154167	8662.34	145505	0.0001131	285.332	5.61881	94.3812	7.33621e-08
9500	2041	1	82471.5	157523	8662.34	147618	1242.56	287.179	5.49909	93.7121	0.788808
9600	2057	1	82677	157936	8662.34	148029	1244.17	287.536	5.48472	93.7275	0.787772
9700	2069	1	82707.4	157997	8662.34	148090	1244.17	287.589	5.48261	93.7299	0.787469
9800	2085	1	83189.5	158983	8662.34	149054	1265.96	288.426	5.44861	93.7551	0.796291
9900	2098	1	83389.5	159392	8662.34	149454	1275.23	288.772	5.43462	93.7653	0.800057
10000	2108	1	83567.7	159435	8662.34	149811	961.538	289.081	5.43316	93.9637	0.603093
10100	2124	1	83643.8	159587	8662.34	149963	961.538	289.212	5.42798	93.9695	0.602518
10200	2134	1	83703.2	159706	8662.34	150082	961.538	289.315	5.42394	93.974	0.602069
10300	2151	1	83790.2	159882	8662.34	150256	963.866	289.465	5.41797	93.9792	0.602862
10400	2156	1	83832.2	159967	8662.34	150340	964.728	289.538	5.41509	93.9818	0.60308
10500	2162	1	84274.6	160872	8662.34	151224	985.207	290.301	5.38462	94.003	0.612417
10600	2169	1	84292.6	160040	8662.34	151260	117.508	290.332	5.4126	94.514	0.0734238
10700	2180	1	84313.8	160083	8662.34	151303	117.719	290.368	5.41116	94.5153	0.0735365
10800	2190	1	84421.9	160301	8662.34	151519	119.293	290.554	5.40381	94.5218	0.0744182
10900	2196	1	84439.4	160329	8662.34	151554	112.876	290.585	5.40284	94.5268	0.0704028
11000	2201	1	84461.2	160373	8662.34	151598	112.565	290.622	5.40139	94.5284	0.07019
11100	2206	1	84488.3	160426	8662.34	151652	112.188	290.669	5.39957	94.5305	0.0699309
11200	2213	1	84500.3	160345	8662.34	151676	6.62328	290.689	5.40232	94.5936	0.00413065
11300	2215	1	84501.7	160348	8662.34	151679	6.61637	290.692	5.40222	94.5937	0.00412626
11400	2218	1	84596	160537	8662.34	151867	7.55686	290.854	5.39585	94.5995	0.00470723
11500	2226	1	84650.1	160645	8662.34	151975	7.07565	290.947	5.39223	94.6034	0.00440453
11600	2229	1	84822.9	160991	8662.34	152321	7.07565	291.244	5.38065	94.615	0.00439507
11700	2234	1	84835	161015	8662.34	152345	7.07565	291.264	5.37985	94.6158	0.00439441
11800	2238	1	84855.6	161059	8662.34	152387	9.62617	291.3	5.37838	94.6156	0.00597682
11900	2243	1	84871.8	161088	8662.34	152419	6.50718	291.328	5.37741	94.6186	0.00403952
12000	2255	1	85003.9	161352	8662.34	152683	6.07183	291.554	5.36861	94.6276	0.00376311
12100	2265	1	85094.9	161530	8662.34	152865	2.64188	291.71	5.36268	94.6357	0.00163554
12200	2267	1	85115.8	161572	8662.34	152907	2.64188	291.746	5.36129	94.6371	0.00163511
12300	2274	1	85355.2	162053	8662.34	153386	4.81024	292.156	5.34538	94.6517	0.00296832
12400	2283	1	85393	162124	8662.34	153461	0	292.221	5.34305	94.657	0
12500	2288	1	85818.1	162974	8662.34	154311	0	292.947	5.31518	94.6848	0
12600	2293	1	85829.2	162996	8662.34	154334	0	292.966	5.31445	94.6856	0
12700	2299	1	85890.6	163119	8662.34	154456	0	293.071	5.31045	94.6896	0
12800	2312	1	86051.5	163441	8662.34	154778	0	293.345	5.3	94.7	0
12900	2319	1	86074.1	163486	8662.34	154824	0	293.384	5.29853	94.7015	0
13000	2327	1	86140.7	163619	8662.34	154957	0	293.497	5.29422	94.7058	0
13100	2336	1	86199.9	163748	8662.34	155075	10.7272	293.598	5.29004	94.7034	0.00655103
13200	2347	1	86296.9	163942	8662.34	155269	10.696	293.763	5.28378	94.7097	0.00652423
13300	2360	1	86530.3	164409	8662.34	155736	10.9797	294.16	5.26877	94.7246	0.00667828
13400	2366	1	86558.6	164465	8662.34	155793	10.5316	294.208	5.26697	94.7266	0.00640355
13500	2373	1	86623.5	164595	8662.34	155922	10.5316	294.319	5.26282	94.7308	0.0063985
13600	2377	1	86720.9	164790	8662.34	156117	10.5316	294.484	5.25659	94.737	0.00639093
13700	2385	1	86782.8	164905	8662.34	156241	1.49129	294.589	5.25294	94.7462	0.000904332
13800	2389	1	86789.9	164919	8662.34	156255	1.49129	294.601	5.25249	94.7466	0.000904254
13900	2401	1	86823.6	164985	8662.34	156323	0	294.658	5.25039	94.7496	0
14000	2408	1	86904.6	165147	8662.34	156485	0	294.796	5.24524	94.7548	0
14100	2416	1	86919.4	165176	8662.34	156514	0	294.821	5.2443	94.7557	0
14200	2419	1	86972.2	165282	8662.34	156620	0	294.911	5.24095	94.7591	0
14300	2421	1	86980.8	165299	8662.34	156637	0	294.925	5.2404	94.7596	0
14400	2427	1	86996.1	165330	8662.34	156667	0	294.951	5.23943	94.7606	0
14500	2433	1	87004.9	165347	8662.34	156685	0	294.966	5.23887	94.7611	0
14600	2437	1	87028.6	165395	8662.34	156733	0	295.006	5.23737	94.7626	0
14700	2441	1	87094.1	165526	8662.34	156863	0	295.117	5.23323	94.7668	0
14800	2441	1	87094.1	165526	8662.34	156863	0	295.117	5.23323	94.7668	0
14900	2446	1	87134.6	165607	8662.34	156944	0	295.186	5.23067	94.7693	0
15000	2448	1	87136.9	165611	8662.34	156949	0	295.19	5.23052	94.7695	0
15100	2452	1	87145.3	165628	8662.34	156966	0	295.204	5.22999	94.77	0
15200	2455	1	87162.7	165663	8662.34	157001	0	295.233	5.22889	94.7711	0
15300	2457	1	87173.7	165685	8662.34	157023	0	295.252	5.2282	94.7718	0
15400	2457	1	87173.7	165685	8662.34	157023	0	295.252	5.2282	94.7718	0
15500	2457	1	87173.7	165685	8662.34	157023	0	295.252	5.2282	94.7718	0
15600	2457	1	87173.7	165685	8662.34	157023	0	295.252	5.2282	94.7718	0
15700	2459	1	87174.5	165687	8662.34	157024	0	295.253	5.22815	94.7719	0
15800	2459	1	87174.5	165687	8662.34	157024	0	295.253	5.22815	94.7719	0
15900	2462	1	87246.9	165832	8662.34	157169	0	295.376	5.22358	94.7764	0
16000	2464	1	87607.1	166552	8662.34	157889	0	295.985	5.20099	94.799	0
16100	2464	1	87607.1	166552	8662.34	157889	0	295.985	5.20099	94.799	0
16200	2464	1	87607.1	166552	8662.34	157889	0	295.985	5.20099	94.799	0
16300	2464	1	87607.1	166552	8662.34	157889	0	295.985	5.20099	94.799	0
16400	2465	1	87612.9	166563	8662.34	157901	0	295.995	5.20063	94.7994	0
16500	2467	1	87631.8	166601	8662.34	157939	0	296.027	5.19945	94.8006	0
16600	2469	1	87693.6	166725	8662.34	158063	0	296.131	5.19559	94.8044	0
16700	2469	1	87693.6	166725	8662.34	158063	0	296.131	5.19559	94.8044	0
16800	2469	1	87693.6	166725	8662.34	158063	0	296.131	5.19559	94.8044	0
16900	2469	1	87693.6	166725	8662.34	158063	0	296.131	5.19559	94.8044	0
17000	2469	1	87693.6	166725	8662.34	158063	0	296.131	5.19559	94.8044	0
17100	2470	1	87702.2	166742	8662.34	158080	0	296.146	5.19506	94.8049	0
17200	2470	1	87702.2	166742	8662.34	158080	0	296.146	5.19506	94.8049	0
17300	2470	1	87702.2	166742	8662.34	158080	0	296.146	5.19506	94.8049	0
17400	2470	1	87702.2	166742	8662.34	158080	0	296.146	5.19506	94.8049	0
17500	2471	1	87703.1	166744	8662.34	158081	0	296.147	5.195	94.805	0
17600	2472	1	87714.5	166767	8662.34	158104	0	296.166	5.19429	94.8057	0
17700	2472	1	87714.5	166767	8662.34	158104	0	296.166	5.19429	94.8057	0
17800	2472	1	87714.5	166767	8662.34	158104	0	296.166	5.19429	94.8057	0
17900	2472	1	87714.5	166767	8662.34	158104	0	296.166	5.19429	94.8057	0
18000	2472	1	87714.5	166767	8662.34	158104	0	296.166	5.19429	94.8057	0
18100	2473	1	87723.4	166785	8662.34	158122	0	296.181	5.19373	94.8063	0
18200	2475	1	87735.5	166809	8662.34	158146	0	296.202	5.19298	94.807	0
18300	2475	1	87735.5	166809	8662.34	158146	0	296.202	5.19298	94.807	0
18400	2475	1	87735.5	166809	8662.34	158146	0	296.202	5.19298	94.807	0
18500	2475	1	87735.5	166809	8662.34	158146	0	296.202	5.19298	94.807	0
18600	2475	1	87735.5	166809	8662.34	158146	0	296.202	5.19298	94.807	0
18700	2476	1	87738.5	166815	8662.34	158152	0	296.207	5.19279	94.8072	0
18800	2477	1	87747.3	166832	8662.34	158170	0	296.222	5.19225	94.8078	0
18900	2478	1	87753.6	166845	8662.34	158183	0	296.232	5.19185	94.8081	0
19000	2478	1	87753.6	166845	8662.34	158183	0	296.232	5.19185	94.8081	0
19100	2479	1	87773	166884	8662.34	158221	0	296.265	5.19065	94.8094	0
19200	2482	1	87784.7	166907	8662.34	158245	0	296.285	5.18992	94.8101	0
19300	2483	1	87787.7	166913	8662.34	158251	0	296.29	5.18974	94.8103	0
19400	2483	1	87787.7	166913	8662.34	158251	0	296.29	5.18974	94.8103	0
19500	2484	1	87793.9	166925	8662.34	158263	0	296.3	5.18935	94.8107	0
19600	2484	1	87793.9	166925	8662.34	158263	0	296.3	5.18935	94.8107	0
19700	2487	1	87821.4	166981	8662.34	158318	0	296.347	5.18764	94.8124	0
19800	2488	1	87830.8	166999	8662.34	158337	0	296.363	5.18705	94.8129	0
19900	2491	1	87833.2	167004	8662.34	158342	0	296.367	5.18691	94.8131	0
20000	2493	1	87854.7	167047	8662.34	158385	0	296.403	5.18557	94.8144	0
20100	2494	1	87857.1	167052	8662.34	158389	0	296.407	5.18542	94.8146	0
20200	2495	1	87860.2	167058	8662.34	158396	0	296.412	5.18523	94.8148	0
20300	2497	1	87868.5	167075	8662.34	158412	0	296.426	5.18471	94.8153	0
20400	2497	1	87868.5	167075	8662.34	158412	0	296.426	5.18471	94.8153	0
20500	2498	1	87868.8	167075	8662.34	158413	0	296.427	5.1847	94.8153	0
20600	2500	1	87889.9	167118	8662.34	158455	0	296.462	5.18338	94.8166	0
20700	2501	1	87892.2	167122	8662.34	158460	0	296.466	5.18324	94.8168	0
20800	2502	1	87895.3	167128	8662.34	158466	0	296.471	5.18305	94.8169	0
20900	2502	1	87895.3	167128	8662.34	158466	0	296.471	5.18305	94.8169	0
21000	2502	1	87895.3	167128	8662.34	158466	0	296.471	5.18305	94.8169	0

## Sheet: EP_FS
DIST	NL	NC	IICnum	Sum_varIIC	Sum_varIICintra	Sum_varIICflux	Sum_varIICconnector	eciic	thetaiicintra	thetaiicflux	thetaiicconnector
100	9	41	6664.67	6898.42	6442.06	445.204	11.1515	81.6374	93.3847	6.45372	0.161653
200	21	31	6729.78	7050.87	6442.06	575.427	33.3762	82.0352	91.3656	8.16108	0.473363
300	38	20	8525.93	12594.6	6442.06	4167.74	1984.8	92.336	51.1494	33.0915	15.7591
400	58	15	9647.55	14370.9	6442.06	6410.97	1517.82	98.2219	44.8273	44.6109	10.5618
500	71	11	10099.4	15294.7	6442.06	7314.7	1537.96	100.496	42.1195	47.825	10.0555
600	85	11	10256	14687.7	6442.06	7627.93	617.71	101.272	43.8603	51.9341	4.20563
700	97	9	11797.9	19957.5	6442.06	10711.7	2803.73	108.618	32.2789	53.6727	14.0485
800	113	8	12403.4	19129.8	6442.06	11922.7	765.119	111.371	33.6755	62.3249	3.99961
900	126	6	13855	24014.7	6442.06	14825.9	2746.75	117.707	26.8255	61.7367	11.4378
1000	144	6	14518.3	24282.4	6442.06	16152.4	1687.97	120.492	26.5297	66.5189	6.95142
1100	157	6	14696.7	24484.1	6442.06	16509.2	1532.87	121.23	26.3112	67.4281	6.26069
1200	173	5	16205.3	28203.5	6442.06	19526.5	2234.88	127.3	22.8414	69.2345	7.92413
1300	182	5	16292.3	28362.8	6442.06	19700.4	2220.33	127.641	22.7131	69.4586	7.82831
1400	194	5	16405.3	28576.8	6442.06	19926.4	2208.4	128.083	22.543	69.7291	7.72792
1500	205	5	16827.7	28491.3	6442.06	20771.3	1277.89	129.722	22.6106	72.9042	4.4852
1600	220	5	17083.1	28076.2	6442.06	21282	352.184	130.702	22.9449	75.8007	1.25438
1700	235	4	17281.2	28547.4	6442.06	21678.2	427.077	131.458	22.5662	75.9377	1.49603
1800	255	2	23434.6	54017.9	6442.06	33985	13590.9	153.084	11.9258	62.9143	25.1599
1900	276	2	23766	47902.5	6442.06	34647.9	6812.52	154.162	13.4483	72.3301	14.2217
2000	300	1	28590.8	67627.8	6442.06	44297.6	16888.2	169.088	9.52576	65.502	24.9723
2100	320	1	28652.4	67652.6	6442.06	44420.6	16789.9	169.27	9.52227	65.6599	24.8178
2200	335	1	28782.6	63706.3	6442.06	44681.1	12583.1	169.654	10.1121	70.1361	19.7518
2300	353	1	29504.9	64900.6	6442.06	46125.7	12332.9	171.77	9.92605	71.0713	19.0027
2400	371	1	29753.3	61785.2	6442.06	46622.5	8720.63	172.492	10.4265	75.459	14.1144
2500	388	1	30086.1	54972.8	6442.06	47288.1	1242.63	173.454	11.7186	86.0209	2.26044
2600	410	1	30834.3	57297.3	6442.06	48784.5	2070.69	175.597	11.2432	85.1428	3.61394
2700	426	1	31202.7	57321.2	6442.06	49521.3	1357.85	176.643	11.2385	86.3926	2.36883
2800	432	1	32440.6	60559.7	6442.06	51997	2120.68	180.113	10.6375	85.8607	3.50179
2900	448	1	33177.1	61573.7	6442.06	53470.1	1661.53	182.146	10.4624	86.8392	2.69844
3000	460	1	33540.4	62253.6	6442.06	54196.8	1614.73	183.141	10.3481	87.0581	2.59379
3100	470	1	33672.9	62134.1	6442.06	54461.7	1230.38	183.502	10.368	87.6518	1.9802
3200	480	1	33847.7	62559.6	6442.06	54811.3	1306.23	183.977	10.2975	87.6145	2.08798
3300	486	1	34678.1	64891	6442.06	56472.1	1976.79	186.221	9.92752	87.0262	3.04633
3400	497	1	34968.5	64961.8	6442.06	57052.9	1466.78	186.999	9.9167	87.8254	2.25792
3500	507	1	35849.3	66525	6442.06	58814.4	1268.51	189.339	9.68367	88.4095	1.90682
3600	514	1	35961.2	66396.7	6442.06	59038.2	916.421	189.634	9.70239	88.9174	1.38022
3700	524	1	36025	66368.8	6442.06	59165.9	760.78	189.803	9.70647	89.1472	1.14629
3800	532	1	36096.7	66122.3	6442.06	59309.2	371.002	189.991	9.74265	89.6963	0.561084
3900	543	1	36203.7	66211	6442.06	59523.3	245.596	190.273	9.7296	89.8995	0.37093
4000	555	1	37083	69029.9	6442.06	61281.9	1305.91	192.57	9.33228	88.7759	1.8918
4100	571	1	37636.6	69666	6442.06	62389.2	834.809	194.002	9.24707	89.5546	1.1983
4200	581	1	38314.5	70660.6	6442.06	63744.9	473.679	195.741	9.11691	90.2127	0.670357
4300	591	1	38660.9	71305.5	6442.06	64437.7	425.699	196.624	9.03446	90.3685	0.597007
4400	602	1	38802.1	71451.3	6442.06	64720.1	289.199	196.982	9.01602	90.5792	0.404749
4500	613	1	38865.1	71527.2	6442.06	64846	239.134	197.142	9.00646	90.6592	0.334326
4600	628	1	38945	71657.6	6442.06	65005.9	209.56	197.345	8.99007	90.7175	0.292446
4700	641	1	39211.9	72082.6	6442.06	65539.7	100.837	198.02	8.93706	90.9231	0.139891
4800	656	1	39396.6	72414.1	6442.06	65909.1	62.9796	198.486	8.89614	91.0169	0.0869715
4900	675	1	39741.8	73082.1	6442.06	66599.4	40.5661	199.353	8.81484	91.1297	0.0555076
5000	690	1	39971.8	73535.5	6442.06	67059.5	33.8655	199.93	8.76049	91.1935	0.0460533
5100	702	1	40121.1	73826.3	6442.06	67358.2	26.0673	200.303	8.72598	91.2387	0.0353089
5200	718	1	40358.3	74278.9	6442.06	67832.4	4.43932	200.894	8.67281	91.3212	0.00597656
5300	734	1	41168	75953.2	6442.06	69451.9	59.2686	202.899	8.48163	91.4403	0.078033
5400	755	1	41576	76722.7	6442.06	70267.9	12.7471	203.902	8.39656	91.5868	0.0166146
5500	770	1	41713.7	76987.2	6442.06	70543.3	1.83403	204.239	8.3677	91.6299	0.00238226
5600	785	1	41865.6	77292.1	6442.06	70847.1	2.91893	204.611	8.3347	91.6615	0.0037765
5700	802	1	42198.3	78163.6	6442.06	71512.4	209.149	205.422	8.24177	91.4906	0.267578
5800	816	1	42416.6	78391.1	6442.06	71949	0	205.953	8.21785	91.7821	0
5900	832	1	43119.1	79796.1	6442.06	73354.1	0	207.651	8.07315	91.9269	0
6000	848	1	43365	80316.6	6442.06	73845.9	28.6499	208.243	8.02083	91.9435	0.0356712
6100	862	1	43487.3	80532.5	6442.06	74090.5	0	208.536	7.99933	92.0007	0
6200	880	1	43724.4	81006.8	6442.06	74564.7	0	209.104	7.9525	92.0475	0
6300	891	1	43765.8	81089.5	6442.06	74647.4	0	209.203	7.94439	92.0556	0
6400	904	1	43882.1	81322.2	6442.06	74880.2	0	209.481	7.92165	92.0784	0
6500	918	1	43960	81477.9	6442.06	75035.8	0	209.666	7.90652	92.0935	0
6600	933	1	44109.9	81783.3	6442.06	75335.6	5.64987	210.023	7.87699	92.1161	0.00690834
6700	952	1	44183.5	81929.2	6442.06	75482.9	4.2383	210.199	7.86296	92.1319	0.00517313
6800	966	1	44346.6	82251.1	6442.06	75809	0	210.586	7.8322	92.1678	0
6900	977	1	44428.2	82415.1	6442.06	75972.2	0.848823	210.78	7.81661	92.1824	0.00102994
7000	989	1	44470.2	82501.8	6442.06	76056.2	3.52461	210.879	7.80839	92.1873	0.00427216
7100	1001	1	44514.7	82587.3	6442.06	76145.3	0	210.985	7.80031	92.1997	0
7200	1015	1	44614.4	82786.7	6442.06	76344.6	0	211.221	7.78152	92.2185	0
7300	1025	1	44664.1	82895.3	6442.06	76444.1	9.20194	211.339	7.77132	92.2176	0.0111007
7400	1032	1	44682.7	82932.5	6442.06	76481.2	9.20194	211.383	7.76784	92.2211	0.0110957
7500	1040	1	44697.2	82961.5	6442.06	76510.3	9.20194	211.417	7.76512	92.2238	0.0110918
7600	1053	1	44738.8	83035.4	6442.06	76593.4	0	211.515	7.75821	92.2418	0
7700	1063	1	44753.3	83064.5	6442.06	76622.4	0	211.55	7.7555	92.2445	0
7800	1075	1	44770	83097.9	6442.06	76655.8	0	211.589	7.75238	92.2476	0
7900	1085	1	44814.6	83187.2	6442.06	76745.1	0	211.695	7.74406	92.256	0
8000	1095	1	44819.3	83196.6	6442.06	76754.5	0	211.706	7.74318	92.2568	0
8100	1105	1	44858.9	83275.7	6442.06	76833.6	0	211.799	7.73583	92.2642	0
8200	1115	1	44935	83427.9	6442.06	76985.9	0	211.979	7.72171	92.2783	0
8300	1127	1	44953.9	83465.8	6442.06	77023.7	0	212.023	7.71821	92.2818	0
8400	1135	1	45362.4	84282.8	6442.06	77840.7	0	212.985	7.64339	92.3566	0
8500	1145	1	45370.6	84299.1	6442.06	77857	0	213.004	7.64191	92.3581	0
8600	1149	1	45445.5	84448.8	6442.06	78006.8	0	213.179	7.62836	92.3716	0
8700	1154	1	45469.4	84496.7	6442.06	78054.6	0	213.235	7.62405	92.376	0
8800	1160	1	45476.5	84510.9	6442.06	78068.9	0	213.252	7.62276	92.3772	0
8900	1165	1	45496.7	84551.3	6442.06	78109.3	0	213.3	7.61912	92.3809	0
9000	1170	1	45527.1	84612.1	6442.06	78170	0	213.371	7.61365	92.3864	0
9100	1173	1	45537.5	84633	6442.06	78190.9	0	213.395	7.61176	92.3882	0
9200	1177	1	45676.4	84910.7	6442.06	78468.7	0	213.72	7.58687	92.4131	0
9300	1180	1	45749.3	85056.6	6442.06	78614.6	0	213.891	7.57385	92.4262	0
9400	1183	1	45937.1	85432.1	6442.06	78990	0	214.329	7.54057	92.4594	0
9500	1185	1	45940.1	85438.1	6442.06	78996.1	0	214.336	7.54004	92.46	0
9600	1187	1	45979.9	85517.8	6442.06	79075.8	0	214.429	7.53301	92.467	0
9700	1189	1	45999.5	85556.9	6442.06	79114.9	0	214.475	7.52957	92.4704	0
9800	1193	1	46411.6	86381.1	6442.06	79939	0	215.433	7.45773	92.5423	0
9900	1194	1	46414.5	86386.9	6442.06	79944.8	0	215.44	7.45723	92.5428	0
10000	1196	1	46539	86635.9	6442.06	80193.8	0	215.729	7.43579	92.5642	0
10100	1196	1	46539	86635.9	6442.06	80193.8	0	215.729	7.43579	92.5642	0
10200	1197	1	46540	86637.8	6442.06	80195.8	0	215.731	7.43562	92.5644	0
10300	1200	1	46590.6	86739.2	6442.06	80297.2	0	215.849	7.42693	92.5731	0
10400	1201	1	46608	86773.9	6442.06	80331.9	0	215.889	7.42396	92.5761	0
10500	1203	1	47020.9	87599.8	6442.06	81157.7	0	216.843	7.35398	92.646	0
10600	1206	1	47029.1	87616.1	6442.06	81174	0	216.862	7.35261	92.6474	0
10700	1209	1	47031.2	87620.3	6442.06	81178.3	0	216.867	7.35225	92.6478	0
10800	1211	1	47094.8	87747.6	6442.06	81305.6	0	217.013	7.34158	92.6584	0
10900	1212	1	47095	87747.9	6442.06	81305.8	0	217.014	7.34156	92.6585	0
11000	1213	1	47095.5	87749	6442.06	81307	0	217.015	7.34147	92.6586	0
11100	1214	1	47095.9	87749.7	6442.06	81307.6	0	217.016	7.34141	92.6586	0
11200	1215	1	47096.4	87750.7	6442.06	81308.7	0	217.017	7.34133	92.6587	0
11300	1215	1	47096.4	87750.7	6442.06	81308.7	0	217.017	7.34133	92.6587	0
11400	1215	1	47096.4	87750.7	6442.06	81308.7	0	217.017	7.34133	92.6587	0
11500	1217	1	47105.8	87769.6	6442.06	81327.5	0	217.039	7.33975	92.6603	0
11600	1218	1	47123	87803.9	6442.06	81361.8	0	217.078	7.33688	92.6631	0
11700	1219	1	47125.7	87809.4	6442.06	81367.4	0	217.085	7.33642	92.6636	0
11800	1221	1	47141.2	87840.3	6442.06	81398.2	0	217.12	7.33384	92.6662	0
11900	1221	1	47141.2	87840.3	6442.06	81398.2	0	217.12	7.33384	92.6662	0
12000	1222	1	47148.2	87854.4	6442.06	81412.3	0	217.136	7.33266	92.6673	0
12100	1223	1	47159.1	87876.1	6442.06	81434	0	217.161	7.33085	92.6692	0
12200	1224	1	47159.9	87877.8	6442.06	81435.8	0	217.163	7.33071	92.6693	0
12300	1224	1	47159.9	87877.8	6442.06	81435.8	0	217.163	7.33071	92.6693	0
12400	1224	1	47159.9	87877.8	6442.06	81435.8	0	217.163	7.33071	92.6693	0
12500	1224	1	47159.9	87877.8	6442.06	81435.8	0	217.163	7.33071	92.6693	0
12600	1224	1	47159.9	87877.8	6442.06	81435.8	0	217.163	7.33071	92.6693	0
12700	1224	1	47159.9	87877.8	6442.06	81435.8	0	217.163	7.33071	92.6693	0
12800	1224	1	47159.9	87877.8	6442.06	81435.8	0	217.163	7.33071	92.6693	0
12900	1224	1	47159.9	87877.8	6442.06	81435.8	0	217.163	7.33071	92.6693	0
13000	1225	1	47178.3	87914.6	6442.06	81472.6	0	217.206	7.32764	92.6724	0
13100	1225	1	47178.3	87914.6	6442.06	81472.6	0	217.206	7.32764	92.6724	0
13200	1225	1	47178.3	87914.6	6442.06	81472.6	0	217.206	7.32764	92.6724	0
13300	1225	1	47178.3	87914.6	6442.06	81472.6	0	217.206	7.32764	92.6724	0
13400	1225	1	47178.3	87914.6	6442.06	81472.6	0	217.206	7.32764	92.6724	0
13500	1225	1	47178.3	87914.6	6442.06	81472.6	0	217.206	7.32764	92.6724	0
13600	1225	1	47178.3	87914.6	6442.06	81472.6	0	217.206	7.32764	92.6724	0
13700	1225	1	47178.3	87914.6	6442.06	81472.6	0	217.206	7.32764	92.6724	0
13800	1225	1	47178.3	87914.6	6442.06	81472.6	0	217.206	7.32764	92.6724	0
13900	1225	1	47178.3	87914.6	6442.06	81472.6	0	217.206	7.32764	92.6724	0
14000	1225	1	47178.3	87914.6	6442.06	81472.6	0	217.206	7.32764	92.6724	0
14100	1225	1	47178.3	87914.6	6442.06	81472.6	0	217.206	7.32764	92.6724	0
14200	1225	1	47178.3	87914.6	6442.06	81472.6	0	217.206	7.32764	92.6724	0
14300	1225	1	47178.3	87914.6	6442.06	81472.6	0	217.206	7.32764	92.6724	0
14400	1225	1	47178.3	87914.6	6442.06	81472.6	0	217.206	7.32764	92.6724	0
14500	1225	1	47178.3	87914.6	6442.06	81472.6	0	217.206	7.32764	92.6724	0
14600	1225	1	47178.3	87914.6	6442.06	81472.6	0	217.206	7.32764	92.6724	0
14700	1225	1	47178.3	87914.6	6442.06	81472.6	0	217.206	7.32764	92.6724	0
14800	1225	1	47178.3	87914.6	6442.06	81472.6	0	217.206	7.32764	92.6724	0
14900	1225	1	47178.3	87914.6	6442.06	81472.6	0	217.206	7.32764	92.6724	0
15000	1225	1	47178.3	87914.6	6442.06	81472.6	0	217.206	7.32764	92.6724	0
15100	1225	1	47178.3	87914.6	6442.06	81472.6	0	217.206	7.32764	92.6724	0
15200	1225	1	47178.3	87914.6	6442.06	81472.6	0	217.206	7.32764	92.6724	0
15300	1225	1	47178.3	87914.6	6442.06	81472.6	0	217.206	7.32764	92.6724	0
15400	1225	1	47178.3	87914.6	6442.06	81472.6	0	217.206	7.32764	92.6724	0
15500	1225	1	47178.3	87914.6	6442.06	81472.6	0	217.206	7.32764	92.6724	0
15600	1225	1	47178.3	87914.6	6442.06	81472.6	0	217.206	7.32764	92.6724	0
15700	1225	1	47178.3	87914.6	6442.06	81472.6	0	217.206	7.32764	92.6724	0
15800	1225	1	47178.3	87914.6	6442.06	81472.6	0	217.206	7.32764	92.6724	0
15900	1225	1	47178.3	87914.6	6442.06	81472.6	0	217.206	7.32764	92.6724	0
16000	1225	1	47178.3	87914.6	6442.06	81472.6	0	217.206	7.32764	92.6724	0
16100	1225	1	47178.3	87914.6	6442.06	81472.6	0	217.206	7.32764	92.6724	0
16200	1225	1	47178.3	87914.6	6442.06	81472.6	0	217.206	7.32764	92.6724	0
16300	1225	1	47178.3	87914.6	6442.06	81472.6	0	217.206	7.32764	92.6724	0
16400	1225	1	47178.3	87914.6	6442.06	81472.6	0	217.206	7.32764	92.6724	0
16500	1225	1	47178.3	87914.6	6442.06	81472.6	0	217.206	7.32764	92.6724	0
16600	1225	1	47178.3	87914.6	6442.06	81472.6	0	217.206	7.32764	92.6724	0
16700	1225	1	47178.3	87914.6	6442.06	81472.6	0	217.206	7.32764	92.6724	0
16800	1225	1	47178.3	87914.6	6442.06	81472.6	0	217.206	7.32764	92.6724	0
16900	1225	1	47178.3	87914.6	6442.06	81472.6	0	217.206	7.32764	92.6724	0
17000	1225	1	47178.3	87914.6	6442.06	81472.6	0	217.206	7.32764	92.6724	0
17100	1225	1	47178.3	87914.6	6442.06	81472.6	0	217.206	7.32764	92.6724	0
17200	1225	1	47178.3	87914.6	6442.06	81472.6	0	217.206	7.32764	92.6724	0
17300	1225	1	47178.3	87914.6	6442.06	81472.6	0	217.206	7.32764	92.6724	0
17400	1225	1	47178.3	87914.6	6442.06	81472.6	0	217.206	7.32764	92.6724	0
17500	1225	1	47178.3	87914.6	6442.06	81472.6	0	217.206	7.32764	92.6724	0
17600	1225	1	47178.3	87914.6	6442.06	81472.6	0	217.206	7.32764	92.6724	0
17700	1225	1	47178.3	87914.6	6442.06	81472.6	0	217.206	7.32764	92.6724	0
17800	1225	1	47178.3	87914.6	6442.06	81472.6	0	217.206	7.32764	92.6724	0
17900	1225	1	47178.3	87914.6	6442.06	81472.6	0	217.206	7.32764	92.6724	0
18000	1225	1	47178.3	87914.6	6442.06	81472.6	0	217.206	7.32764	92.6724	0
18100	1225	1	47178.3	87914.6	6442.06	81472.6	0	217.206	7.32764	92.6724	0
18200	1225	1	47178.3	87914.6	6442.06	81472.6	0	217.206	7.32764	92.6724	0
18300	1225	1	47178.3	87914.6	6442.06	81472.6	0	217.206	7.32764	92.6724	0
18400	1225	1	47178.3	87914.6	6442.06	81472.6	0	217.206	7.32764	92.6724	0
18500	1225	1	47178.3	87914.6	6442.06	81472.6	0	217.206	7.32764	92.6724	0
18600	1225	1	47178.3	87914.6	6442.06	81472.6	0	217.206	7.32764	92.6724	0
18700	1225	1	47178.3	87914.6	6442.06	81472.6	0	217.206	7.32764	92.6724	0
18800	1225	1	47178.3	87914.6	6442.06	81472.6	0	217.206	7.32764	92.6724	0
18900	1225	1	47178.3	87914.6	6442.06	81472.6	0	217.206	7.32764	92.6724	0
19000	1225	1	47178.3	87914.6	6442.06	81472.6	0	217.206	7.32764	92.6724	0
19100	1225	1	47178.3	87914.6	6442.06	81472.6	0	217.206	7.32764	92.6724	0
19200	1225	1	47178.3	87914.6	6442.06	81472.6	0	217.206	7.32764	92.6724	0
19300	1225	1	47178.3	87914.6	6442.06	81472.6	0	217.206	7.32764	92.6724	0
19400	1225	1	47178.3	87914.6	6442.06	81472.6	0	217.206	7.32764	92.6724	0
19500	1225	1	47178.3	87914.6	6442.06	81472.6	0	217.206	7.32764	92.6724	0
19600	1225	1	47178.3	87914.6	6442.06	81472.6	0	217.206	7.32764	92.6724	0
19700	1225	1	47178.3	87914.6	6442.06	81472.6	0	217.206	7.32764	92.6724	0
19800	1225	1	47178.3	87914.6	6442.06	81472.6	0	217.206	7.32764	92.6724	0
19900	1225	1	47178.3	87914.6	6442.06	81472.6	0	217.206	7.32764	92.6724	0
20000	1225	1	47178.3	87914.6	6442.06	81472.6	0	217.206	7.32764	92.6724	0
20100	1225	1	47178.3	87914.6	6442.06	81472.6	0	217.206	7.32764	92.6724	0
20200	1225	1	47178.3	87914.6	6442.06	81472.6	0	217.206	7.32764	92.6724	0
20300	1225	1	47178.3	87914.6	6442.06	81472.6	0	217.206	7.32764	92.6724	0
20400	1225	1	47178.3	87914.6	6442.06	81472.6	0	217.206	7.32764	92.6724	0
20500	1225	1	47178.3	87914.6	6442.06	81472.6	0	217.206	7.32764	92.6724	0
20600	1225	1	47178.3	87914.6	6442.06	81472.6	0	217.206	7.32764	92.6724	0
20700	1225	1	47178.3	87914.6	6442.06	81472.6	0	217.206	7.32764	92.6724	0
20800	1225	1	47178.3	87914.6	6442.06	81472.6	0	217.206	7.32764	92.6724	0
20900	1225	1	47178.3	87914.6	6442.06	81472.6	0	217.206	7.32764	92.6724	0
21000	1225	1	47178.3	87914.6	6442.06	81472.6	0	217.206	7.32764	92.6724	0
